# Supplementary material for: Selection signatures in tropical cattle are enriched for promoter and coding regions and reveal missense mutations in the damage response gene HELB
Source: Genet Sel Evol. 2020 May 27;52:27. doi: 10.1186/s12711-020-00546-6 (PMC7251699; doi:10.1186/s12711-020-00546-6)
Supplement: Supplementary file 2 — Additional file 2: Table S1. Taurine versus indicine FST and nucleotide diversity genome-wide in 20-kb overlapping windows with a 10 kb step size. [file 12711_2020_546_MOESM2_ESM.xlsx]

## Sheet: Table S1
Table S1 : Taurine versus Indicine Fst and Nucleotide diversity in 20KB windows with 10KB overlap genome-wide.
Reg_id	chr	start	end	Fst	pi
Chr10_1_20000	Chr10	1	20000	0.159841	-1.45567
Chr10_10001_30000	Chr10	10001	30000	0.174143	-1.44535
Chr10_20001_40000	Chr10	20001	40000	0.177988	-1.33628
Chr10_30001_50000	Chr10	30001	50000	0.165119	-1.19185
Chr10_40001_60000	Chr10	40001	60000	0.157806	-1.14655
Chr10_50001_70000	Chr10	50001	70000	0.172018	-1.34604
Chr10_60001_80000	Chr10	60001	80000	0.17727	-1.395
Chr10_70001_90000	Chr10	70001	90000	0.160957	-1.01155
Chr10_80001_100000	Chr10	80001	100000	0.17226	-1.15604
Chr10_90001_110000	Chr10	90001	110000	0.201923	-1.74909
Chr10_100001_120000	Chr10	100001	120000	0.122606	-0.645489
Chr10_110001_130000	Chr10	110001	130000	0.164063	-0.789952
Chr10_120001_140000	Chr10	120001	140000	0.165358	-0.94506
Chr10_130001_150000	Chr10	130001	150000	0.17198	-1.02239
Chr10_140001_160000	Chr10	140001	160000	0.158503	-0.650724
Chr10_150001_170000	Chr10	150001	170000	0.16238	-1.38683
Chr10_160001_180000	Chr10	160001	180000	0.183609	-2.10981
Chr10_170001_190000	Chr10	170001	190000	0.151871	-1.28235
Chr10_180001_200000	Chr10	180001	200000	0.0712523	-0.310143
Chr10_190001_210000	Chr10	190001	210000	0.045351	-0.127081
Chr10_200001_220000	Chr10	200001	220000	0.0417135	-0.036526
Chr10_210001_230000	Chr10	210001	230000	0.0470082	-0.0816688
Chr10_220001_240000	Chr10	220001	240000	0.0471408	-0.243743
Chr10_230001_250000	Chr10	230001	250000	0.0465255	-0.237062
Chr10_240001_260000	Chr10	240001	260000	0.0625659	-0.226209
Chr10_250001_270000	Chr10	250001	270000	0.0958575	-0.441996
Chr10_260001_280000	Chr10	260001	280000	0.0957098	-0.475878
Chr10_270001_290000	Chr10	270001	290000	0.0824917	-0.337121
Chr10_280001_300000	Chr10	280001	300000	0.0763218	-0.178142
Chr10_290001_310000	Chr10	290001	310000	0.0775307	-0.0693241
Chr10_300001_320000	Chr10	300001	320000	0.146361	-0.508079
Chr10_310001_330000	Chr10	310001	330000	0.173716	-0.447735
Chr10_320001_340000	Chr10	320001	340000	0.162097	0.0599096
Chr10_330001_350000	Chr10	330001	350000	0.242122	-0.735153
Chr10_340001_360000	Chr10	340001	360000	0.360969	-1.81297
Chr10_350001_370000	Chr10	350001	370000	0.413362	-2.6812
Chr10_360001_380000	Chr10	360001	380000	0.396842	-2.35816
Chr10_370001_390000	Chr10	370001	390000	0.329078	-1.07212
Chr10_380001_400000	Chr10	380001	400000	0.313016	-0.194955
Chr10_390001_410000	Chr10	390001	410000	0.266895	0.262019
Chr10_400001_420000	Chr10	400001	420000	0.197164	0.0185513
Chr10_410001_430000	Chr10	410001	430000	0.172193	-0.302438
Chr10_420001_440000	Chr10	420001	440000	0.20603	-0.596554
Chr10_430001_450000	Chr10	430001	450000	0.234812	-0.510874
Chr10_440001_460000	Chr10	440001	460000	0.261464	0.125265
Chr10_450001_470000	Chr10	450001	470000	0.207091	0.191339
Chr10_460001_480000	Chr10	460001	480000	0.13517	0.10454
Chr10_470001_490000	Chr10	470001	490000	0.14468	-0.00264177
Chr10_480001_500000	Chr10	480001	500000	0.187021	-0.328362
Chr10_490001_510000	Chr10	490001	510000	0.237597	-0.756422
Chr10_500001_520000	Chr10	500001	520000	0.318268	-0.633616
Chr10_510001_530000	Chr10	510001	530000	0.27755	0.251361
Chr10_520001_540000	Chr10	520001	540000	0.311788	-0.122435
Chr10_530001_550000	Chr10	530001	550000	0.402684	-1.05125
Chr10_540001_560000	Chr10	540001	560000	0.28636	-0.979887
Chr10_550001_570000	Chr10	550001	570000	0.343326	-1.1543
Chr10_560001_580000	Chr10	560001	580000	0.324291	-0.629886
Chr10_570001_590000	Chr10	570001	590000	0.213177	-0.25802
Chr10_580001_600000	Chr10	580001	600000	0.196168	-0.394171
Chr10_590001_610000	Chr10	590001	610000	0.185306	-0.236935
Chr10_600001_620000	Chr10	600001	620000	0.177882	-0.0506563
Chr10_610001_630000	Chr10	610001	630000	0.222514	-0.493492
Chr10_620001_640000	Chr10	620001	640000	0.231658	-0.700417
Chr10_630001_650000	Chr10	630001	650000	0.247307	-0.74309
Chr10_640001_660000	Chr10	640001	660000	0.271844	-1.48204
Chr10_650001_670000	Chr10	650001	670000	0.268063	-1.47562
Chr10_660001_680000	Chr10	660001	680000	0.292038	-1.3095
Chr10_670001_690000	Chr10	670001	690000	0.280162	-1.02225
Chr10_680001_700000	Chr10	680001	700000	0.231956	-0.783054
Chr10_690001_710000	Chr10	690001	710000	0.189783	-1.04905
Chr10_700001_720000	Chr10	700001	720000	0.152831	-0.93184
Chr10_710001_730000	Chr10	710001	730000	0.0936058	-0.249887
Chr10_720001_740000	Chr10	720001	740000	0.0791116	-0.204906
Chr10_730001_750000	Chr10	730001	750000	0.124372	-0.841354
Chr10_740001_760000	Chr10	740001	760000	0.238878	-1.53741
Chr10_750001_770000	Chr10	750001	770000	0.277718	-1.83143
Chr10_760001_780000	Chr10	760001	780000	0.264622	-1.80429
Chr10_770001_790000	Chr10	770001	790000	0.238912	-1.50886
Chr10_780001_800000	Chr10	780001	800000	0.191036	-1.06606
Chr10_790001_810000	Chr10	790001	810000	0.183731	-0.620741
Chr10_800001_820000	Chr10	800001	820000	0.182497	-0.781914
Chr10_810001_830000	Chr10	810001	830000	0.206775	-1.17739
Chr10_820001_840000	Chr10	820001	840000	0.241685	-1.20971
Chr10_830001_850000	Chr10	830001	850000	0.266055	-1.06249
Chr10_840001_860000	Chr10	840001	860000	0.248001	-0.982028
Chr10_850001_870000	Chr10	850001	870000	0.224213	-0.634439
Chr10_860001_880000	Chr10	860001	880000	0.231799	-0.488748
Chr10_870001_890000	Chr10	870001	890000	0.280675	-1.0079
Chr10_880001_900000	Chr10	880001	900000	0.268318	-0.764559
Chr10_890001_910000	Chr10	890001	910000	0.242939	-0.63239
Chr10_900001_920000	Chr10	900001	920000	0.240166	-0.83022
Chr10_910001_930000	Chr10	910001	930000	0.229765	-0.952878
Chr10_920001_940000	Chr10	920001	940000	0.195089	-1.25657
Chr10_930001_950000	Chr10	930001	950000	0.183533	-1.19108
Chr10_940001_960000	Chr10	940001	960000	0.223084	-0.542363
Chr10_950001_970000	Chr10	950001	970000	0.246445	-0.588795
Chr10_960001_980000	Chr10	960001	980000	0.294041	-1.39005
Chr10_970001_990000	Chr10	970001	990000	0.27207	-1.37726
Chr10_980001_1000000	Chr10	980001	1000000	0.246193	-1.19522
Chr10_990001_1010000	Chr10	990001	1010000	0.25338	-1.45014
Chr10_1000001_1020000	Chr10	1000001	1020000	0.249117	-1.67656
Chr10_1010001_1030000	Chr10	1010001	1030000	0.242819	-1.64525
Chr10_1020001_1040000	Chr10	1020001	1040000	0.267797	-1.70924
Chr10_1030001_1050000	Chr10	1030001	1050000	0.299106	-1.37896
Chr10_1040001_1060000	Chr10	1040001	1060000	0.310905	-1.14851
Chr10_1050001_1070000	Chr10	1050001	1070000	0.339233	-1.28705
Chr10_1060001_1080000	Chr10	1060001	1080000	0.335813	-1.42138
Chr10_1070001_1090000	Chr10	1070001	1090000	0.302011	-1.22449
Chr10_1080001_1100000	Chr10	1080001	1100000	0.305812	-1.37052
Chr10_1090001_1110000	Chr10	1090001	1110000	0.323203	-1.99276
Chr10_1100001_1120000	Chr10	1100001	1120000	0.284669	-1.74454
Chr10_1110001_1130000	Chr10	1110001	1130000	0.224136	-0.93628
Chr10_1120001_1140000	Chr10	1120001	1140000	0.211949	-0.319345
Chr10_1130001_1150000	Chr10	1130001	1150000	0.272918	-0.697549
Chr10_1140001_1160000	Chr10	1140001	1160000	0.313025	-1.74313
Chr10_1150001_1170000	Chr10	1150001	1170000	0.285231	-1.74486
Chr10_1160001_1180000	Chr10	1160001	1180000	0.31858	-1.97876
Chr10_1170001_1190000	Chr10	1170001	1190000	0.306399	-1.8569
Chr10_1180001_1200000	Chr10	1180001	1200000	0.197422	-0.817472
Chr10_1190001_1210000	Chr10	1190001	1210000	0.179904	-0.337694
Chr10_1200001_1220000	Chr10	1200001	1220000	0.202591	-0.564482
Chr10_1210001_1230000	Chr10	1210001	1230000	0.243557	-0.910735
Chr10_1220001_1240000	Chr10	1220001	1240000	0.311668	-1.12543
Chr10_1230001_1250000	Chr10	1230001	1250000	0.331091	-1.30911
Chr10_1240001_1260000	Chr10	1240001	1260000	0.239066	-0.997905
Chr10_1250001_1270000	Chr10	1250001	1270000	0.214059	-1.01576
Chr10_1260001_1280000	Chr10	1260001	1280000	0.268152	-1.47921
Chr10_1270001_1290000	Chr10	1270001	1290000	0.283455	-1.7187
Chr10_1280001_1300000	Chr10	1280001	1300000	0.298512	-1.47878
Chr10_1290001_1310000	Chr10	1290001	1310000	0.294318	-1.36464
Chr10_1300001_1320000	Chr10	1300001	1320000	0.279919	-1.42542
Chr10_1310001_1330000	Chr10	1310001	1330000	0.222695	-1.04154
Chr10_1320001_1340000	Chr10	1320001	1340000	0.155847	-0.81957
Chr10_1330001_1350000	Chr10	1330001	1350000	0.137798	-0.383759
Chr10_1340001_1360000	Chr10	1340001	1360000	0.188216	-0.459699
Chr10_1350001_1370000	Chr10	1350001	1370000	0.283072	-1.11069
Chr10_1360001_1380000	Chr10	1360001	1380000	0.351793	-1.76388
Chr10_1370001_1390000	Chr10	1370001	1390000	0.293212	-0.765056
Chr10_1380001_1400000	Chr10	1380001	1400000	0.193951	-0.400496
Chr10_1390001_1410000	Chr10	1390001	1410000	0.248807	-1.08287
Chr10_1400001_1420000	Chr10	1400001	1420000	0.342268	-1.52148
Chr10_1410001_1430000	Chr10	1410001	1430000	0.307451	-1.66639
Chr10_1420001_1440000	Chr10	1420001	1440000	0.237882	-1.71751
Chr10_1430001_1450000	Chr10	1430001	1450000	0.229729	-1.65324
Chr10_1440001_1460000	Chr10	1440001	1460000	0.217642	-1.48429
Chr10_1450001_1470000	Chr10	1450001	1470000	0.265985	-1.27741
Chr10_1460001_1480000	Chr10	1460001	1480000	0.310183	-0.558762
Chr10_1470001_1490000	Chr10	1470001	1490000	0.255985	0.0784109
Chr10_1480001_1500000	Chr10	1480001	1500000	0.247917	-0.326764
Chr10_1490001_1510000	Chr10	1490001	1510000	0.283804	-0.525086
Chr10_1500001_1520000	Chr10	1500001	1520000	0.306112	-0.655651
Chr10_1510001_1530000	Chr10	1510001	1530000	0.287573	-0.701699
Chr10_1520001_1540000	Chr10	1520001	1540000	0.307435	-0.652416
Chr10_1530001_1550000	Chr10	1530001	1550000	0.264702	-0.360201
Chr10_1540001_1560000	Chr10	1540001	1560000	0.213181	-0.82083
Chr10_1550001_1570000	Chr10	1550001	1570000	0.285136	-1.39722
Chr10_1560001_1580000	Chr10	1560001	1580000	0.357911	-1.29859
Chr10_1570001_1590000	Chr10	1570001	1590000	0.330193	-0.988352
Chr10_1580001_1600000	Chr10	1580001	1600000	0.36122	-0.898401
Chr10_1590001_1610000	Chr10	1590001	1610000	0.470454	-0.917688
Chr10_1600001_1620000	Chr10	1600001	1620000	0.463042	-0.973371
Chr10_1610001_1630000	Chr10	1610001	1630000	0.411997	-1.01871
Chr10_1620001_1640000	Chr10	1620001	1640000	0.370401	-1.18302
Chr10_1630001_1650000	Chr10	1630001	1650000	0.312939	-1.63645
Chr10_1640001_1660000	Chr10	1640001	1660000	0.272098	-1.46838
Chr10_1650001_1670000	Chr10	1650001	1670000	0.268186	-1.0569
Chr10_1660001_1680000	Chr10	1660001	1680000	0.288125	-1.4243
Chr10_1670001_1690000	Chr10	1670001	1690000	0.292307	-1.15871
Chr10_1680001_1700000	Chr10	1680001	1700000	0.450766	-1.25559
Chr10_1690001_1710000	Chr10	1690001	1710000	0.580952	-1.61832
Chr10_1700001_1720000	Chr10	1700001	1720000	0.515343	-1.52093
Chr10_1710001_1730000	Chr10	1710001	1730000	0.374287	-1.77757
Chr10_1720001_1740000	Chr10	1720001	1740000	0.336327	-1.64125
Chr10_1730001_1750000	Chr10	1730001	1750000	0.242216	-0.756963
Chr10_1740001_1760000	Chr10	1740001	1760000	0.150161	-0.06031
Chr10_1750001_1770000	Chr10	1750001	1770000	0.165662	-0.25065
Chr10_1760001_1780000	Chr10	1760001	1780000	0.216073	-0.843065
Chr10_1770001_1790000	Chr10	1770001	1790000	0.215548	-1.20891
Chr10_1780001_1800000	Chr10	1780001	1800000	0.170616	-0.456673
Chr10_1790001_1810000	Chr10	1790001	1810000	0.127342	-0.153929
Chr10_1800001_1820000	Chr10	1800001	1820000	0.132297	-0.19491
Chr10_1810001_1830000	Chr10	1810001	1830000	0.209732	-0.188008
Chr10_1820001_1840000	Chr10	1820001	1840000	0.178922	-0.109817
Chr10_1830001_1850000	Chr10	1830001	1850000	0.107943	-0.0576022
Chr10_1840001_1860000	Chr10	1840001	1860000	0.131886	0.0194254
Chr10_1850001_1870000	Chr10	1850001	1870000	0.144537	0.197353
Chr10_1860001_1880000	Chr10	1860001	1880000	0.1728	0.0823014
Chr10_1870001_1890000	Chr10	1870001	1890000	0.204244	-0.278935
Chr10_1880001_1900000	Chr10	1880001	1900000	0.246758	-0.667745
Chr10_1890001_1910000	Chr10	1890001	1910000	0.321307	-1.04954
Chr10_1900001_1920000	Chr10	1900001	1920000	0.265487	-0.914917
Chr10_1910001_1930000	Chr10	1910001	1930000	0.223128	-0.792825
Chr10_1920001_1940000	Chr10	1920001	1940000	0.264216	-1.07237
Chr10_1930001_1950000	Chr10	1930001	1950000	0.247697	-1.1785
Chr10_1940001_1960000	Chr10	1940001	1960000	0.248203	-1.24278
Chr10_1950001_1970000	Chr10	1950001	1970000	0.316137	-1.56368
Chr10_1960001_1980000	Chr10	1960001	1980000	0.359855	-1.26476
Chr10_1970001_1990000	Chr10	1970001	1990000	0.314486	-0.627406
Chr10_1980001_2000000	Chr10	1980001	2000000	0.220523	-0.182241
Chr10_1990001_2010000	Chr10	1990001	2010000	0.197842	-0.0903584
Chr10_2000001_2020000	Chr10	2000001	2020000	0.153519	-0.139511
Chr10_2010001_2030000	Chr10	2010001	2030000	0.136858	-0.408755
Chr10_2020001_2040000	Chr10	2020001	2040000	0.17936	-0.943166
Chr10_2030001_2050000	Chr10	2030001	2050000	0.242713	-1.47123
Chr10_2040001_2060000	Chr10	2040001	2060000	0.262957	-1.9245
Chr10_2050001_2070000	Chr10	2050001	2070000	0.202147	-1.31752
Chr10_2060001_2080000	Chr10	2060001	2080000	0.168049	-0.66475
Chr10_2070001_2090000	Chr10	2070001	2090000	0.207138	-0.732377
Chr10_2080001_2100000	Chr10	2080001	2100000	0.226699	-0.597364
Chr10_2090001_2110000	Chr10	2090001	2110000	0.171023	-0.205182
Chr10_2100001_2120000	Chr10	2100001	2120000	0.193668	-0.219993
Chr10_2110001_2130000	Chr10	2110001	2130000	0.241234	-0.171843
Chr10_2120001_2140000	Chr10	2120001	2140000	0.28242	-0.0864361
Chr10_2130001_2150000	Chr10	2130001	2150000	0.315682	-0.321008
Chr10_2140001_2160000	Chr10	2140001	2160000	0.303106	-0.529413
Chr10_2150001_2170000	Chr10	2150001	2170000	0.295528	-0.608034
Chr10_2160001_2180000	Chr10	2160001	2180000	0.255932	-1.05332
Chr10_2170001_2190000	Chr10	2170001	2190000	0.224184	-1.41913
Chr10_2180001_2200000	Chr10	2180001	2200000	0.233245	-1.40094
Chr10_2190001_2210000	Chr10	2190001	2210000	0.263754	-1.49522
Chr10_2200001_2220000	Chr10	2200001	2220000	0.221903	-1.99099
Chr10_2210001_2230000	Chr10	2210001	2230000	0.264911	-2.02976
Chr10_2220001_2240000	Chr10	2220001	2240000	0.331974	-2.08166
Chr10_2230001_2250000	Chr10	2230001	2250000	0.386695	-2.17126
Chr10_2240001_2260000	Chr10	2240001	2260000	0.442519	-2.16918
Chr10_2250001_2270000	Chr10	2250001	2270000	0.393489	-1.68798
Chr10_2260001_2280000	Chr10	2260001	2280000	0.24929	-0.900023
Chr10_2270001_2290000	Chr10	2270001	2290000	0.264311	-0.923378
Chr10_2280001_2300000	Chr10	2280001	2300000	0.228795	-0.714743
Chr10_2290001_2310000	Chr10	2290001	2310000	0.129253	-0.360953
Chr10_2300001_2320000	Chr10	2300001	2320000	0.103315	-0.361193
Chr10_2310001_2330000	Chr10	2310001	2330000	0.10624	-0.294481
Chr10_2320001_2340000	Chr10	2320001	2340000	0.101439	-0.389111
Chr10_2330001_2350000	Chr10	2330001	2350000	0.0991361	-0.367828
Chr10_2340001_2360000	Chr10	2340001	2360000	0.0908837	-0.0934767
Chr10_2350001_2370000	Chr10	2350001	2370000	0.102753	-0.201917
Chr10_2360001_2380000	Chr10	2360001	2380000	0.136343	-0.79504
Chr10_2370001_2390000	Chr10	2370001	2390000	0.150204	-1.29235
Chr10_2380001_2400000	Chr10	2380001	2400000	0.145062	-1.13644
Chr10_2390001_2410000	Chr10	2390001	2410000	0.142036	-0.995649
Chr10_2400001_2420000	Chr10	2400001	2420000	0.139841	-0.723884
Chr10_2410001_2430000	Chr10	2410001	2430000	0.140505	-0.211706
Chr10_2420001_2440000	Chr10	2420001	2440000	0.153502	-0.32094
Chr10_2430001_2450000	Chr10	2430001	2450000	0.150416	-0.672778
Chr10_2440001_2460000	Chr10	2440001	2460000	0.146363	-0.925321
Chr10_2450001_2470000	Chr10	2450001	2470000	0.17692	-1.43628
Chr10_2460001_2480000	Chr10	2460001	2480000	0.228839	-1.70766
Chr10_2470001_2490000	Chr10	2470001	2490000	0.226725	-1.60049
Chr10_2480001_2500000	Chr10	2480001	2500000	0.21357	-1.31977
Chr10_2490001_2510000	Chr10	2490001	2510000	0.272275	-0.952131
Chr10_2500001_2520000	Chr10	2500001	2520000	0.376038	-1.32032
Chr10_2510001_2530000	Chr10	2510001	2530000	0.370313	-2.25174
Chr10_2520001_2540000	Chr10	2520001	2540000	0.298449	-1.40977
Chr10_2530001_2550000	Chr10	2530001	2550000	0.204737	-0.699837
Chr10_2540001_2560000	Chr10	2540001	2560000	0.253172	-0.163341
Chr10_2550001_2570000	Chr10	2550001	2570000	0.409001	0.0833819
Chr10_2560001_2580000	Chr10	2560001	2580000	0.424264	-0.0161801
Chr10_2570001_2590000	Chr10	2570001	2590000	0.433142	-0.298642
Chr10_2580001_2600000	Chr10	2580001	2600000	0.410002	-0.373404
Chr10_2590001_2610000	Chr10	2590001	2610000	0.369077	-0.577326
Chr10_2600001_2620000	Chr10	2600001	2620000	0.312906	-0.817169
Chr10_2610001_2630000	Chr10	2610001	2630000	0.207576	-0.454765
Chr10_2620001_2640000	Chr10	2620001	2640000	0.149584	-0.167944
Chr10_2630001_2650000	Chr10	2630001	2650000	0.143706	-0.481817
Chr10_2640001_2660000	Chr10	2640001	2660000	0.169017	-1.43714
Chr10_2650001_2670000	Chr10	2650001	2670000	0.209519	-1.58457
Chr10_2660001_2680000	Chr10	2660001	2680000	0.294016	-1.82954
Chr10_2670001_2690000	Chr10	2670001	2690000	0.259364	-1.21988
Chr10_2680001_2700000	Chr10	2680001	2700000	0.208515	-0.45651
Chr10_2690001_2710000	Chr10	2690001	2710000	0.228016	-0.289678
Chr10_2700001_2720000	Chr10	2700001	2720000	0.254086	-0.434577
Chr10_2710001_2730000	Chr10	2710001	2730000	0.253807	-0.739698
Chr10_2720001_2740000	Chr10	2720001	2740000	0.179037	-0.572407
Chr10_2730001_2750000	Chr10	2730001	2750000	0.139272	-0.389854
Chr10_2740001_2760000	Chr10	2740001	2760000	0.14383	-0.445136
Chr10_2750001_2770000	Chr10	2750001	2770000	0.122282	-0.388717
Chr10_2760001_2780000	Chr10	2760001	2780000	0.121031	-0.701666
Chr10_2770001_2790000	Chr10	2770001	2790000	0.120764	-0.869022
Chr10_2780001_2800000	Chr10	2780001	2800000	0.119431	-0.510669
Chr10_2790001_2810000	Chr10	2790001	2810000	0.135617	-0.573048
Chr10_2800001_2820000	Chr10	2800001	2820000	0.17876	-0.739563
Chr10_2810001_2830000	Chr10	2810001	2830000	0.156273	-0.327758
Chr10_2820001_2840000	Chr10	2820001	2840000	0.146042	-0.374399
Chr10_2830001_2850000	Chr10	2830001	2850000	0.164682	-0.281937
Chr10_2840001_2860000	Chr10	2840001	2860000	0.120884	0.0195064
Chr10_2850001_2870000	Chr10	2850001	2870000	0.128027	-0.125895
Chr10_2860001_2880000	Chr10	2860001	2880000	0.161748	-0.141068
Chr10_2870001_2890000	Chr10	2870001	2890000	0.221251	-0.545483
Chr10_2880001_2900000	Chr10	2880001	2900000	0.250421	-0.96473
Chr10_2890001_2910000	Chr10	2890001	2910000	0.17002	-0.810985
Chr10_2900001_2920000	Chr10	2900001	2920000	0.164775	-1.16018
Chr10_2910001_2930000	Chr10	2910001	2930000	0.17782	-0.78969
Chr10_2920001_2940000	Chr10	2920001	2940000	0.163038	-0.346717
Chr10_2930001_2950000	Chr10	2930001	2950000	0.244908	-0.70927
Chr10_2940001_2960000	Chr10	2940001	2960000	0.309022	-1.2116
Chr10_2950001_2970000	Chr10	2950001	2970000	0.331436	-1.61959
Chr10_2960001_2980000	Chr10	2960001	2980000	0.27543	-1.37823
Chr10_2970001_2990000	Chr10	2970001	2990000	0.211817	-0.754919
Chr10_2980001_3000000	Chr10	2980001	3000000	0.211393	-1.08404
Chr10_2990001_3010000	Chr10	2990001	3010000	0.203993	-1.79087
Chr10_3000001_3020000	Chr10	3000001	3020000	0.196836	-1.68544
Chr10_3010001_3030000	Chr10	3010001	3030000	0.16273	-1.56164
Chr10_3020001_3040000	Chr10	3020001	3040000	0.141289	-1.67573
Chr10_3030001_3050000	Chr10	3030001	3050000	0.161436	-1.97451
Chr10_3040001_3060000	Chr10	3040001	3060000	0.163835	-1.82005
Chr10_3050001_3070000	Chr10	3050001	3070000	0.159742	-1.54107
Chr10_3060001_3080000	Chr10	3060001	3080000	0.140002	-1.36564
Chr10_3070001_3090000	Chr10	3070001	3090000	0.155172	-1.49602
Chr10_3080001_3100000	Chr10	3080001	3100000	0.26659	-2.14725
Chr10_3090001_3110000	Chr10	3090001	3110000	0.279216	-2.52496
Chr10_3100001_3120000	Chr10	3100001	3120000	0.28273	-2.78199
Chr10_3110001_3130000	Chr10	3110001	3130000	0.371417	-2.41514
Chr10_3120001_3140000	Chr10	3120001	3140000	0.285599	-1.45591
Chr10_3130001_3150000	Chr10	3130001	3150000	0.168703	-1.02969
Chr10_3140001_3160000	Chr10	3140001	3160000	0.160082	-0.662366
Chr10_3150001_3170000	Chr10	3150001	3170000	0.209903	-0.692766
Chr10_3160001_3180000	Chr10	3160001	3180000	0.281912	-1.54719
Chr10_3170001_3190000	Chr10	3170001	3190000	0.337946	-1.95343
Chr10_3180001_3200000	Chr10	3180001	3200000	0.302235	-2.05674
Chr10_3190001_3210000	Chr10	3190001	3210000	0.226073	-1.80323
Chr10_3200001_3220000	Chr10	3200001	3220000	0.142137	-0.878023
Chr10_3210001_3230000	Chr10	3210001	3230000	0.172159	-0.989468
Chr10_3220001_3240000	Chr10	3220001	3240000	0.207846	-0.933191
Chr10_3230001_3250000	Chr10	3230001	3250000	0.222597	-1.05822
Chr10_3240001_3260000	Chr10	3240001	3260000	0.267379	-1.54789
Chr10_3250001_3270000	Chr10	3250001	3270000	0.218708	-0.88392
Chr10_3260001_3280000	Chr10	3260001	3280000	0.202083	-0.726783
Chr10_3270001_3290000	Chr10	3270001	3290000	0.230043	-0.724063
Chr10_3280001_3300000	Chr10	3280001	3300000	0.283999	-0.834095
Chr10_3290001_3310000	Chr10	3290001	3310000	0.242271	-0.490034
Chr10_3300001_3320000	Chr10	3300001	3320000	0.14965	-0.1896
Chr10_3310001_3330000	Chr10	3310001	3330000	0.175313	-0.56419
Chr10_3320001_3340000	Chr10	3320001	3340000	0.177108	-0.402177
Chr10_3330001_3350000	Chr10	3330001	3350000	0.147517	-0.226422
Chr10_3340001_3360000	Chr10	3340001	3360000	0.218654	-0.664262
Chr10_3350001_3370000	Chr10	3350001	3370000	0.284365	-1.33577
Chr10_3360001_3380000	Chr10	3360001	3380000	0.310824	-1.59109
Chr10_3370001_3390000	Chr10	3370001	3390000	0.314402	-2.0164
Chr10_3380001_3400000	Chr10	3380001	3400000	0.248973	-1.66533
Chr10_3390001_3410000	Chr10	3390001	3410000	0.216274	-1.12991
Chr10_3400001_3420000	Chr10	3400001	3420000	0.151131	-0.739862
Chr10_3410001_3430000	Chr10	3410001	3430000	0.0825628	-0.428432
Chr10_3420001_3440000	Chr10	3420001	3440000	0.0851026	-0.404407
Chr10_3430001_3450000	Chr10	3430001	3450000	0.0804414	-0.229634
Chr10_3440001_3460000	Chr10	3440001	3460000	0.0915953	-0.30984
Chr10_3450001_3470000	Chr10	3450001	3470000	0.145776	-0.873482
Chr10_3460001_3480000	Chr10	3460001	3480000	0.186498	-1.25969
Chr10_3470001_3490000	Chr10	3470001	3490000	0.183691	-0.940727
Chr10_3480001_3500000	Chr10	3480001	3500000	0.14347	-0.404697
Chr10_3490001_3510000	Chr10	3490001	3510000	0.133685	-0.462451
Chr10_3500001_3520000	Chr10	3500001	3520000	0.144558	-0.670833
Chr10_3510001_3530000	Chr10	3510001	3530000	0.130846	-0.373845
Chr10_3520001_3540000	Chr10	3520001	3540000	0.140153	-0.210031
Chr10_3530001_3550000	Chr10	3530001	3550000	0.140428	0.119562
Chr10_3540001_3560000	Chr10	3540001	3560000	0.16037	0.155425
Chr10_3550001_3570000	Chr10	3550001	3570000	0.22708	-0.13874
Chr10_3560001_3580000	Chr10	3560001	3580000	0.220471	-0.411481
Chr10_3570001_3590000	Chr10	3570001	3590000	0.184973	-0.514005
Chr10_3580001_3600000	Chr10	3580001	3600000	0.210103	-0.780107
Chr10_3590001_3610000	Chr10	3590001	3610000	0.272287	-1.4796
Chr10_3600001_3620000	Chr10	3600001	3620000	0.246062	-1.41345
Chr10_3610001_3630000	Chr10	3610001	3630000	0.19948	-1.0812
Chr10_3620001_3640000	Chr10	3620001	3640000	0.258632	-1.41041
Chr10_3630001_3650000	Chr10	3630001	3650000	0.289323	-1.7533
Chr10_3640001_3660000	Chr10	3640001	3660000	0.230724	-1.54057
Chr10_3650001_3670000	Chr10	3650001	3670000	0.16162	-0.986143
Chr10_3660001_3680000	Chr10	3660001	3680000	0.148279	-0.780699
Chr10_3670001_3690000	Chr10	3670001	3690000	0.189066	-0.705787
Chr10_3680001_3700000	Chr10	3680001	3700000	0.212998	-1.00715
Chr10_3690001_3710000	Chr10	3690001	3710000	0.271759	-1.81981
Chr10_3700001_3720000	Chr10	3700001	3720000	0.295701	-1.40894
Chr10_3710001_3730000	Chr10	3710001	3730000	0.241756	-1.10336
Chr10_3720001_3740000	Chr10	3720001	3740000	0.269862	-1.65981
Chr10_3730001_3750000	Chr10	3730001	3750000	0.233348	-1.61099
Chr10_3740001_3760000	Chr10	3740001	3760000	0.187426	-0.939419
Chr10_3750001_3770000	Chr10	3750001	3770000	0.193311	-0.505672
Chr10_3760001_3780000	Chr10	3760001	3780000	0.169029	-0.196457
Chr10_3770001_3790000	Chr10	3770001	3790000	0.180198	-0.223441
Chr10_3780001_3800000	Chr10	3780001	3800000	0.291357	-1.16745
Chr10_3790001_3810000	Chr10	3790001	3810000	0.32099	-1.6716
Chr10_3800001_3820000	Chr10	3800001	3820000	0.23775	-0.71812
Chr10_3810001_3830000	Chr10	3810001	3830000	0.195535	-0.430348
Chr10_3820001_3840000	Chr10	3820001	3840000	0.186449	-0.952109
Chr10_3830001_3850000	Chr10	3830001	3850000	0.179346	-1.15103
Chr10_3840001_3860000	Chr10	3840001	3860000	0.178829	-0.960791
Chr10_3850001_3870000	Chr10	3850001	3870000	0.150764	-0.786726
Chr10_3860001_3880000	Chr10	3860001	3880000	0.148568	-0.735989
Chr10_3870001_3890000	Chr10	3870001	3890000	0.190114	-0.778404
Chr10_3880001_3900000	Chr10	3880001	3900000	0.204306	-0.674744
Chr10_3890001_3910000	Chr10	3890001	3910000	0.181082	-0.762637
Chr10_3900001_3920000	Chr10	3900001	3920000	0.154771	-0.998488
Chr10_3910001_3930000	Chr10	3910001	3930000	0.16896	-1.2555
Chr10_3920001_3940000	Chr10	3920001	3940000	0.216755	-1.60908
Chr10_3930001_3950000	Chr10	3930001	3950000	0.20091	-1.39151
Chr10_3940001_3960000	Chr10	3940001	3960000	0.176405	-0.801195
Chr10_3950001_3970000	Chr10	3950001	3970000	0.16976	-0.668818
Chr10_3960001_3980000	Chr10	3960001	3980000	0.161271	-0.813218
Chr10_3970001_3990000	Chr10	3970001	3990000	0.185342	-0.847047
Chr10_3980001_4000000	Chr10	3980001	4000000	0.209218	-0.857946
Chr10_3990001_4010000	Chr10	3990001	4010000	0.251312	-1.15179
Chr10_4000001_4020000	Chr10	4000001	4020000	0.186607	-1.19735
Chr10_4010001_4030000	Chr10	4010001	4030000	0.116161	-0.748252
Chr10_4020001_4040000	Chr10	4020001	4040000	0.134554	-0.686072
Chr10_4030001_4050000	Chr10	4030001	4050000	0.154953	-0.762266
Chr10_4040001_4060000	Chr10	4040001	4060000	0.144652	-0.779633
Chr10_4050001_4070000	Chr10	4050001	4070000	0.193274	-0.821572
Chr10_4060001_4080000	Chr10	4060001	4080000	0.262911	-0.868831
Chr10_4070001_4090000	Chr10	4070001	4090000	0.297788	-1.11201
Chr10_4080001_4100000	Chr10	4080001	4100000	0.268004	-1.49131
Chr10_4090001_4110000	Chr10	4090001	4110000	0.202112	-2.10697
Chr10_4100001_4120000	Chr10	4100001	4120000	0.17806	-2.07542
Chr10_4110001_4130000	Chr10	4110001	4130000	0.160202	-1.24017
Chr10_4120001_4140000	Chr10	4120001	4140000	0.147854	-1.03751
Chr10_4130001_4150000	Chr10	4130001	4150000	0.145823	-0.981024
Chr10_4140001_4160000	Chr10	4140001	4160000	0.254222	-0.846119
Chr10_4150001_4170000	Chr10	4150001	4170000	0.269861	-0.496106
Chr10_4160001_4180000	Chr10	4160001	4180000	0.24442	-0.487485
Chr10_4170001_4190000	Chr10	4170001	4190000	0.219955	-0.936068
Chr10_4180001_4200000	Chr10	4180001	4200000	0.228623	-1.10852
Chr10_4190001_4210000	Chr10	4190001	4210000	0.21851	-1.03236
Chr10_4200001_4220000	Chr10	4200001	4220000	0.189713	-1.04128
Chr10_4210001_4230000	Chr10	4210001	4230000	0.291181	-1.52534
Chr10_4220001_4240000	Chr10	4220001	4240000	0.361474	-1.8783
Chr10_4230001_4250000	Chr10	4230001	4250000	0.372539	-1.7719
Chr10_4240001_4260000	Chr10	4240001	4260000	0.37765	-1.71756
Chr10_4250001_4270000	Chr10	4250001	4270000	0.308288	-0.881615
Chr10_4260001_4280000	Chr10	4260001	4280000	0.22222	-0.1908
Chr10_4270001_4290000	Chr10	4270001	4290000	0.207998	-0.521842
Chr10_4280001_4300000	Chr10	4280001	4300000	0.244074	-1.3898
Chr10_4290001_4310000	Chr10	4290001	4310000	0.273533	-1.25769
Chr10_4300001_4320000	Chr10	4300001	4320000	0.305648	-1.33279
Chr10_4310001_4330000	Chr10	4310001	4330000	0.375204	-1.30652
Chr10_4320001_4340000	Chr10	4320001	4340000	0.318602	-1.21218
Chr10_4330001_4350000	Chr10	4330001	4350000	0.219667	-0.575888
Chr10_4340001_4360000	Chr10	4340001	4360000	0.257871	-0.55678
Chr10_4350001_4370000	Chr10	4350001	4370000	0.25782	-0.83371
Chr10_4360001_4380000	Chr10	4360001	4380000	0.211893	-1.01885
Chr10_4370001_4390000	Chr10	4370001	4390000	0.198558	-1.33864
Chr10_4380001_4400000	Chr10	4380001	4400000	0.196138	-1.12074
Chr10_4390001_4410000	Chr10	4390001	4410000	0.226742	-1.35394
Chr10_4400001_4420000	Chr10	4400001	4420000	0.255988	-1.40113
Chr10_4410001_4430000	Chr10	4410001	4430000	0.2405	-0.74796
Chr10_4420001_4440000	Chr10	4420001	4440000	0.220417	-0.610183
Chr10_4430001_4450000	Chr10	4430001	4450000	0.175736	-0.337389
Chr10_4440001_4460000	Chr10	4440001	4460000	0.135883	0.0166142
Chr10_4450001_4470000	Chr10	4450001	4470000	0.143924	-0.161249
Chr10_4460001_4480000	Chr10	4460001	4480000	0.179843	-0.497797
Chr10_4470001_4490000	Chr10	4470001	4490000	0.208981	-0.761027
Chr10_4480001_4500000	Chr10	4480001	4500000	0.217055	-0.899792
Chr10_4490001_4510000	Chr10	4490001	4510000	0.165658	-0.620479
Chr10_4500001_4520000	Chr10	4500001	4520000	0.149281	-0.325225
Chr10_4510001_4530000	Chr10	4510001	4530000	0.21781	-0.438452
Chr10_4520001_4540000	Chr10	4520001	4540000	0.166313	-0.451923
Chr10_4530001_4550000	Chr10	4530001	4550000	0.0872297	-0.382503
Chr10_4540001_4560000	Chr10	4540001	4560000	0.100474	-0.536463
Chr10_4550001_4570000	Chr10	4550001	4570000	0.142792	-0.986444
Chr10_4560001_4580000	Chr10	4560001	4580000	0.13228	-0.621553
Chr10_4570001_4590000	Chr10	4570001	4590000	0.141262	-0.40604
Chr10_4580001_4600000	Chr10	4580001	4600000	0.182807	-0.516932
Chr10_4590001_4610000	Chr10	4590001	4610000	0.220379	-0.919344
Chr10_4600001_4620000	Chr10	4600001	4620000	0.269277	-1.10417
Chr10_4610001_4630000	Chr10	4610001	4630000	0.264652	-1.23333
Chr10_4620001_4640000	Chr10	4620001	4640000	0.205089	-1.63011
Chr10_4630001_4650000	Chr10	4630001	4650000	0.186199	-1.27967
Chr10_4640001_4660000	Chr10	4640001	4660000	0.147509	-0.113213
Chr10_4650001_4670000	Chr10	4650001	4670000	0.123665	-0.0475556
Chr10_4660001_4680000	Chr10	4660001	4680000	0.123474	-0.139519
Chr10_4670001_4690000	Chr10	4670001	4690000	0.151434	-0.388526
Chr10_4680001_4700000	Chr10	4680001	4700000	0.178519	-0.63752
Chr10_4690001_4710000	Chr10	4690001	4710000	0.210865	-0.992356
Chr10_4700001_4720000	Chr10	4700001	4720000	0.208992	-1.24046
Chr10_4710001_4730000	Chr10	4710001	4730000	0.187438	-0.972651
Chr10_4720001_4740000	Chr10	4720001	4740000	0.192588	-0.740551
Chr10_4730001_4750000	Chr10	4730001	4750000	0.225802	-0.652771
Chr10_4740001_4760000	Chr10	4740001	4760000	0.228995	-0.618208
Chr10_4750001_4770000	Chr10	4750001	4770000	0.23413	-0.706184
Chr10_4760001_4780000	Chr10	4760001	4780000	0.28423	-1.27189
Chr10_4770001_4790000	Chr10	4770001	4790000	0.224506	-0.955089
Chr10_4780001_4800000	Chr10	4780001	4800000	0.123997	-0.318974
Chr10_4790001_4810000	Chr10	4790001	4810000	0.157144	-0.98972
Chr10_4800001_4820000	Chr10	4800001	4820000	0.201756	-1.31783
Chr10_4810001_4830000	Chr10	4810001	4830000	0.253011	-1.06026
Chr10_4820001_4840000	Chr10	4820001	4840000	0.248482	-0.914258
Chr10_4830001_4850000	Chr10	4830001	4850000	0.257152	-1.15605
Chr10_4840001_4860000	Chr10	4840001	4860000	0.227787	-0.635003
Chr10_4850001_4870000	Chr10	4850001	4870000	0.156558	-0.332699
Chr10_4860001_4880000	Chr10	4860001	4880000	0.145305	-0.327224
Chr10_4870001_4890000	Chr10	4870001	4890000	0.205627	-0.370494
Chr10_4880001_4900000	Chr10	4880001	4900000	0.240932	-0.859222
Chr10_4890001_4910000	Chr10	4890001	4910000	0.24158	-1.99907
Chr10_4900001_4920000	Chr10	4900001	4920000	0.256379	-1.6606
Chr10_4910001_4930000	Chr10	4910001	4930000	0.272027	-1.5666
Chr10_4920001_4940000	Chr10	4920001	4940000	0.228577	-1.43325
Chr10_4930001_4950000	Chr10	4930001	4950000	0.190701	-1.04615
Chr10_4940001_4960000	Chr10	4940001	4960000	0.240229	-1.04351
Chr10_4950001_4970000	Chr10	4950001	4970000	0.246704	-1.35881
Chr10_4960001_4980000	Chr10	4960001	4980000	0.19717	-1.14648
Chr10_4970001_4990000	Chr10	4970001	4990000	0.175099	-1.07777
Chr10_4980001_5000000	Chr10	4980001	5000000	0.198359	-1.47146
Chr10_4990001_5010000	Chr10	4990001	5010000	0.244497	-1.62779
Chr10_5000001_5020000	Chr10	5000001	5020000	0.228078	-1.29309
Chr10_5010001_5030000	Chr10	5010001	5030000	0.200378	-1.08897
Chr10_5020001_5040000	Chr10	5020001	5040000	0.150287	-0.7685
Chr10_5030001_5050000	Chr10	5030001	5050000	0.130237	-0.643143
Chr10_5040001_5060000	Chr10	5040001	5060000	0.155953	-0.912165
Chr10_5050001_5070000	Chr10	5050001	5070000	0.16185	-0.824501
Chr10_5060001_5080000	Chr10	5060001	5080000	0.151914	-0.446076
Chr10_5070001_5090000	Chr10	5070001	5090000	0.164801	-0.527828
Chr10_5080001_5100000	Chr10	5080001	5100000	0.246485	-0.988639
Chr10_5090001_5110000	Chr10	5090001	5110000	0.255362	-1.08451
Chr10_5100001_5120000	Chr10	5100001	5120000	0.237152	-1.10895
Chr10_5110001_5130000	Chr10	5110001	5130000	0.285507	-1.53412
Chr10_5120001_5140000	Chr10	5120001	5140000	0.26988	-1.70461
Chr10_5130001_5150000	Chr10	5130001	5150000	0.235622	-1.5794
Chr10_5140001_5160000	Chr10	5140001	5160000	0.171971	-1.18046
Chr10_5150001_5170000	Chr10	5150001	5170000	0.148343	-0.830682
Chr10_5160001_5180000	Chr10	5160001	5180000	0.157579	-0.871975
Chr10_5170001_5190000	Chr10	5170001	5190000	0.130069	-0.65704
Chr10_5180001_5200000	Chr10	5180001	5200000	0.138267	-0.747498
Chr10_5190001_5210000	Chr10	5190001	5210000	0.188963	-1.42207
Chr10_5200001_5220000	Chr10	5200001	5220000	0.193346	-1.37887
Chr10_5210001_5230000	Chr10	5210001	5230000	0.168727	-1.07783
Chr10_5220001_5240000	Chr10	5220001	5240000	0.150981	-1.14386
Chr10_5230001_5250000	Chr10	5230001	5250000	0.158012	-1.2021
Chr10_5240001_5260000	Chr10	5240001	5260000	0.149428	-1.0055
Chr10_5250001_5270000	Chr10	5250001	5270000	0.160657	-0.987364
Chr10_5260001_5280000	Chr10	5260001	5280000	0.152328	-1.0651
Chr10_5270001_5290000	Chr10	5270001	5290000	0.196441	-1.83897
Chr10_5280001_5300000	Chr10	5280001	5300000	0.194379	-1.92824
Chr10_5290001_5310000	Chr10	5290001	5310000	0.12059	-1.25311
Chr10_5300001_5320000	Chr10	5300001	5320000	0.177193	-1.53804
Chr10_5310001_5330000	Chr10	5310001	5330000	0.195283	-1.14317
Chr10_5320001_5340000	Chr10	5320001	5340000	0.134982	-0.796811
Chr10_5330001_5350000	Chr10	5330001	5350000	0.126176	-1.24369
Chr10_5340001_5360000	Chr10	5340001	5360000	0.190208	-1.17989
Chr10_5350001_5370000	Chr10	5350001	5370000	0.183183	-0.564986
Chr10_5360001_5380000	Chr10	5360001	5380000	0.142669	-0.223538
Chr10_5370001_5390000	Chr10	5370001	5390000	0.12821	-0.16483
Chr10_5380001_5400000	Chr10	5380001	5400000	0.158476	-0.462785
Chr10_5390001_5410000	Chr10	5390001	5410000	0.147021	-0.605116
Chr10_5400001_5420000	Chr10	5400001	5420000	0.134112	-0.521571
Chr10_5410001_5430000	Chr10	5410001	5430000	0.15138	-0.427079
Chr10_5420001_5440000	Chr10	5420001	5440000	0.122073	-0.445021
Chr10_5430001_5450000	Chr10	5430001	5450000	0.1086	-0.408001
Chr10_5440001_5460000	Chr10	5440001	5460000	0.151253	-0.658336
Chr10_5450001_5470000	Chr10	5450001	5470000	0.154094	-0.763158
Chr10_5460001_5480000	Chr10	5460001	5480000	0.128343	-0.295694
Chr10_5470001_5490000	Chr10	5470001	5490000	0.123605	-0.0650627
Chr10_5480001_5500000	Chr10	5480001	5500000	0.219546	-0.535084
Chr10_5490001_5510000	Chr10	5490001	5510000	0.307179	-0.744089
Chr10_5500001_5520000	Chr10	5500001	5520000	0.209156	-0.225992
Chr10_5510001_5530000	Chr10	5510001	5530000	0.174145	-0.347654
Chr10_5520001_5540000	Chr10	5520001	5540000	0.151244	-0.469158
Chr10_5530001_5550000	Chr10	5530001	5550000	0.121356	-0.366985
Chr10_5540001_5560000	Chr10	5540001	5560000	0.126324	-0.34997
Chr10_5550001_5570000	Chr10	5550001	5570000	0.0888061	-0.127739
Chr10_5560001_5580000	Chr10	5560001	5580000	0.077171	-0.195998
Chr10_5570001_5590000	Chr10	5570001	5590000	0.0824112	-0.552011
Chr10_5580001_5600000	Chr10	5580001	5600000	0.106732	-0.824437
Chr10_5590001_5610000	Chr10	5590001	5610000	0.156882	-0.34015
Chr10_5600001_5620000	Chr10	5600001	5620000	0.150963	-0.279391
Chr10_5610001_5630000	Chr10	5610001	5630000	0.173711	-1.63438
Chr10_5620001_5640000	Chr10	5620001	5640000	0.227377	-2.19313
Chr10_5630001_5650000	Chr10	5630001	5650000	0.233414	-2.32055
Chr10_5640001_5660000	Chr10	5640001	5660000	0.214389	-1.5391
Chr10_5650001_5670000	Chr10	5650001	5670000	0.166867	-0.312734
Chr10_5660001_5680000	Chr10	5660001	5680000	0.115847	-0.248398
Chr10_5670001_5690000	Chr10	5670001	5690000	0.102132	-0.660568
Chr10_5680001_5700000	Chr10	5680001	5700000	0.099563	-0.796239
Chr10_5690001_5710000	Chr10	5690001	5710000	0.154697	-2.53088
Chr10_5700001_5720000	Chr10	5700001	5720000	0.169705	-2.63147
Chr10_5710001_5730000	Chr10	5710001	5730000	0.138104	-1.92216
Chr10_5720001_5740000	Chr10	5720001	5740000	0.109615	-1.01637
Chr10_5730001_5750000	Chr10	5730001	5750000	0.108265	-0.635704
Chr10_5740001_5760000	Chr10	5740001	5760000	0.117555	-0.0721182
Chr10_5750001_5770000	Chr10	5750001	5770000	0.107028	0.0587384
Chr10_5760001_5780000	Chr10	5760001	5780000	0.154871	-0.668893
Chr10_5770001_5790000	Chr10	5770001	5790000	0.17039	-0.762634
Chr10_5780001_5800000	Chr10	5780001	5800000	0.145089	-0.409111
Chr10_5790001_5810000	Chr10	5790001	5810000	0.136782	-0.388386
Chr10_5800001_5820000	Chr10	5800001	5820000	0.150484	-0.64312
Chr10_5810001_5830000	Chr10	5810001	5830000	0.161183	-1.18042
Chr10_5820001_5840000	Chr10	5820001	5840000	0.197838	-1.89221
Chr10_5830001_5850000	Chr10	5830001	5850000	0.219664	-2.27769
Chr10_5840001_5860000	Chr10	5840001	5860000	0.182557	-1.57321
Chr10_5850001_5870000	Chr10	5850001	5870000	0.128721	-0.830121
Chr10_5860001_5880000	Chr10	5860001	5880000	0.112183	-0.851808
Chr10_5870001_5890000	Chr10	5870001	5890000	0.125178	-1.14861
Chr10_5880001_5900000	Chr10	5880001	5900000	0.176736	-1.26272
Chr10_5890001_5910000	Chr10	5890001	5910000	0.200421	-1.27083
Chr10_5900001_5920000	Chr10	5900001	5920000	0.157408	-0.3787
Chr10_5910001_5930000	Chr10	5910001	5930000	0.19154	-0.197732
Chr10_5920001_5940000	Chr10	5920001	5940000	0.263728	-0.569765
Chr10_5930001_5950000	Chr10	5930001	5950000	0.252174	-0.857703
Chr10_5940001_5960000	Chr10	5940001	5960000	0.267106	-1.05191
Chr10_5950001_5970000	Chr10	5950001	5970000	0.254716	-0.913308
Chr10_5960001_5980000	Chr10	5960001	5980000	0.185769	-0.865801
Chr10_5970001_5990000	Chr10	5970001	5990000	0.156807	-1.00412
Chr10_5980001_6000000	Chr10	5980001	6000000	0.205289	-0.990155
Chr10_5990001_6010000	Chr10	5990001	6010000	0.262932	-0.853743
Chr10_6000001_6020000	Chr10	6000001	6020000	0.268971	-1.02137
Chr10_6010001_6030000	Chr10	6010001	6030000	0.244247	-1.14595
Chr10_6020001_6040000	Chr10	6020001	6040000	0.153556	-0.290205
Chr10_6030001_6050000	Chr10	6030001	6050000	0.133138	0.127868
Chr10_6040001_6060000	Chr10	6040001	6060000	0.150604	-0.102123
Chr10_6050001_6070000	Chr10	6050001	6070000	0.152191	-0.234894
Chr10_6060001_6080000	Chr10	6060001	6080000	0.176382	-0.426588
Chr10_6070001_6090000	Chr10	6070001	6090000	0.190069	-0.364965
Chr10_6080001_6100000	Chr10	6080001	6100000	0.19102	-0.226889
Chr10_6090001_6110000	Chr10	6090001	6110000	0.18025	-0.410751
Chr10_6100001_6120000	Chr10	6100001	6120000	0.152489	-0.469582
Chr10_6110001_6130000	Chr10	6110001	6130000	0.143633	-0.247054
Chr10_6120001_6140000	Chr10	6120001	6140000	0.135851	-0.0345935
Chr10_6130001_6150000	Chr10	6130001	6150000	0.227917	-0.458288
Chr10_6140001_6160000	Chr10	6140001	6160000	0.275986	-0.88336
Chr10_6150001_6170000	Chr10	6150001	6170000	0.285181	-1.46518
Chr10_6160001_6180000	Chr10	6160001	6180000	0.319843	-2.43063
Chr10_6170001_6190000	Chr10	6170001	6190000	0.321512	-2.35807
Chr10_6180001_6200000	Chr10	6180001	6200000	0.288168	-1.61795
Chr10_6190001_6210000	Chr10	6190001	6210000	0.240165	-1.13169
Chr10_6200001_6220000	Chr10	6200001	6220000	0.22105	-0.801167
Chr10_6210001_6230000	Chr10	6210001	6230000	0.211183	-0.294794
Chr10_6220001_6240000	Chr10	6220001	6240000	0.170185	-0.0829006
Chr10_6230001_6250000	Chr10	6230001	6250000	0.164544	-0.325145
Chr10_6240001_6260000	Chr10	6240001	6260000	0.167976	-0.453812
Chr10_6250001_6270000	Chr10	6250001	6270000	0.140879	-0.319001
Chr10_6260001_6280000	Chr10	6260001	6280000	0.114707	-0.279377
Chr10_6270001_6290000	Chr10	6270001	6290000	0.122168	-0.23373
Chr10_6280001_6300000	Chr10	6280001	6300000	0.179514	-0.346498
Chr10_6290001_6310000	Chr10	6290001	6310000	0.192413	-0.409917
Chr10_6300001_6320000	Chr10	6300001	6320000	0.165111	-0.278334
Chr10_6310001_6330000	Chr10	6310001	6330000	0.158024	-0.238473
Chr10_6320001_6340000	Chr10	6320001	6340000	0.108342	-0.0964695
Chr10_6330001_6350000	Chr10	6330001	6350000	0.114072	-0.335645
Chr10_6340001_6360000	Chr10	6340001	6360000	0.138997	-0.499678
Chr10_6350001_6370000	Chr10	6350001	6370000	0.109625	-0.302292
Chr10_6360001_6380000	Chr10	6360001	6380000	0.0849605	-0.322115
Chr10_6370001_6390000	Chr10	6370001	6390000	0.0937126	-0.60085
Chr10_6380001_6400000	Chr10	6380001	6400000	0.11296	-1.02809
Chr10_6390001_6410000	Chr10	6390001	6410000	0.0911415	-0.431952
Chr10_6400001_6420000	Chr10	6400001	6420000	0.0886196	-0.160004
Chr10_6410001_6430000	Chr10	6410001	6430000	0.114573	-0.194497
Chr10_6420001_6440000	Chr10	6420001	6440000	0.125429	-0.368308
Chr10_6430001_6450000	Chr10	6430001	6450000	0.1741	-0.866769
Chr10_6440001_6460000	Chr10	6440001	6460000	0.231407	-0.864221
Chr10_6450001_6470000	Chr10	6450001	6470000	0.235518	-0.806175
Chr10_6460001_6480000	Chr10	6460001	6480000	0.238492	-1.00064
Chr10_6470001_6490000	Chr10	6470001	6490000	0.270517	-1.04404
Chr10_6480001_6500000	Chr10	6480001	6500000	0.244574	-0.65112
Chr10_6490001_6510000	Chr10	6490001	6510000	0.140449	-0.186503
Chr10_6500001_6520000	Chr10	6500001	6520000	0.0881588	-0.0118619
Chr10_6510001_6530000	Chr10	6510001	6530000	0.117357	-0.191588
Chr10_6520001_6540000	Chr10	6520001	6540000	0.126913	-0.457997
Chr10_6530001_6550000	Chr10	6530001	6550000	0.135799	-0.489869
Chr10_6540001_6560000	Chr10	6540001	6560000	0.12718	-0.80787
Chr10_6550001_6570000	Chr10	6550001	6570000	0.119886	-1.02669
Chr10_6560001_6580000	Chr10	6560001	6580000	0.124247	-1.10707
Chr10_6570001_6590000	Chr10	6570001	6590000	0.126472	-0.440506
Chr10_6580001_6600000	Chr10	6580001	6600000	0.118087	0.125409
Chr10_6590001_6610000	Chr10	6590001	6610000	0.104375	0.114467
Chr10_6600001_6620000	Chr10	6600001	6620000	0.10955	-0.101168
Chr10_6610001_6630000	Chr10	6610001	6630000	0.103379	-0.127353
Chr10_6620001_6640000	Chr10	6620001	6640000	0.0832947	-0.0376403
Chr10_6630001_6650000	Chr10	6630001	6650000	0.0820618	-0.0309029
Chr10_6640001_6660000	Chr10	6640001	6660000	0.0774779	-0.123509
Chr10_6650001_6670000	Chr10	6650001	6670000	0.0926253	-0.076712
Chr10_6660001_6680000	Chr10	6660001	6680000	0.103787	-0.0851368
Chr10_6670001_6690000	Chr10	6670001	6690000	0.11319	-0.289083
Chr10_6680001_6700000	Chr10	6680001	6700000	0.16192	-0.395537
Chr10_6690001_6710000	Chr10	6690001	6710000	0.29041	-0.966501
Chr10_6700001_6720000	Chr10	6700001	6720000	0.354747	-1.76411
Chr10_6710001_6730000	Chr10	6710001	6730000	0.344118	-1.31301
Chr10_6720001_6740000	Chr10	6720001	6740000	0.284827	-0.540527
Chr10_6730001_6750000	Chr10	6730001	6750000	0.215106	-0.478702
Chr10_6740001_6760000	Chr10	6740001	6760000	0.182912	-0.675401
Chr10_6750001_6770000	Chr10	6750001	6770000	0.175493	-0.570815
Chr10_6760001_6780000	Chr10	6760001	6780000	0.16549	-0.692774
Chr10_6770001_6790000	Chr10	6770001	6790000	0.161906	-0.57219
Chr10_6780001_6800000	Chr10	6780001	6800000	0.258145	-1.12243
Chr10_6790001_6810000	Chr10	6790001	6810000	0.266768	-1.54133
Chr10_6800001_6820000	Chr10	6800001	6820000	0.197811	-1.50871
Chr10_6810001_6830000	Chr10	6810001	6830000	0.263978	-1.61437
Chr10_6820001_6840000	Chr10	6820001	6840000	0.314873	-1.70124
Chr10_6830001_6850000	Chr10	6830001	6850000	0.227327	-1.43504
Chr10_6840001_6860000	Chr10	6840001	6860000	0.203657	-1.04177
Chr10_6850001_6870000	Chr10	6850001	6870000	0.217245	-0.78033
Chr10_6860001_6880000	Chr10	6860001	6880000	0.191881	-0.0508705
Chr10_6870001_6890000	Chr10	6870001	6890000	0.222038	-0.0798928
Chr10_6880001_6900000	Chr10	6880001	6900000	0.282549	-0.66838
Chr10_6890001_6910000	Chr10	6890001	6910000	0.273968	-0.647869
Chr10_6900001_6920000	Chr10	6900001	6920000	0.195903	-0.30559
Chr10_6910001_6930000	Chr10	6910001	6930000	0.164955	-0.27544
Chr10_6920001_6940000	Chr10	6920001	6940000	0.194535	-0.677856
Chr10_6930001_6950000	Chr10	6930001	6950000	0.216207	-1.08916
Chr10_6940001_6960000	Chr10	6940001	6960000	0.220312	-1.29672
Chr10_6950001_6970000	Chr10	6950001	6970000	0.186392	-1.34423
Chr10_6960001_6980000	Chr10	6960001	6980000	0.175884	-1.2165
Chr10_6970001_6990000	Chr10	6970001	6990000	0.172696	-1.22738
Chr10_6980001_7000000	Chr10	6980001	7000000	0.160173	-1.00943
Chr10_6990001_7010000	Chr10	6990001	7010000	0.155016	-0.724081
Chr10_7000001_7020000	Chr10	7000001	7020000	0.115881	-0.340623
Chr10_7010001_7030000	Chr10	7010001	7030000	0.109945	-0.121296
Chr10_7020001_7040000	Chr10	7020001	7040000	0.149148	-0.338763
Chr10_7030001_7050000	Chr10	7030001	7050000	0.152364	-0.509309
Chr10_7040001_7060000	Chr10	7040001	7060000	0.13445	-0.290056
Chr10_7050001_7070000	Chr10	7050001	7070000	0.16185	-0.690169
Chr10_7060001_7080000	Chr10	7060001	7080000	0.182702	-0.958128
Chr10_7070001_7090000	Chr10	7070001	7090000	0.170415	-0.838193
Chr10_7080001_7100000	Chr10	7080001	7100000	0.150278	-0.629219
Chr10_7090001_7110000	Chr10	7090001	7110000	0.136452	-0.436561
Chr10_7100001_7120000	Chr10	7100001	7120000	0.143248	-0.502673
Chr10_7110001_7130000	Chr10	7110001	7130000	0.169654	-0.830233
Chr10_7120001_7140000	Chr10	7120001	7140000	0.169203	-0.705137
Chr10_7130001_7150000	Chr10	7130001	7150000	0.214449	-1.05842
Chr10_7140001_7160000	Chr10	7140001	7160000	0.245076	-1.52394
Chr10_7150001_7170000	Chr10	7150001	7170000	0.176231	-0.967474
Chr10_7160001_7180000	Chr10	7160001	7180000	0.125984	-0.557004
Chr10_7170001_7190000	Chr10	7170001	7190000	0.0779399	-0.210305
Chr10_7180001_7200000	Chr10	7180001	7200000	0.0692623	-0.311093
Chr10_7190001_7210000	Chr10	7190001	7210000	0.0885671	-0.77884
Chr10_7200001_7220000	Chr10	7200001	7220000	0.107646	-0.768731
Chr10_7210001_7230000	Chr10	7210001	7230000	0.130312	-0.815961
Chr10_7220001_7240000	Chr10	7220001	7240000	0.128426	-0.631845
Chr10_7230001_7250000	Chr10	7230001	7250000	0.106853	-0.0814135
Chr10_7240001_7260000	Chr10	7240001	7260000	0.107753	-0.0549879
Chr10_7250001_7270000	Chr10	7250001	7270000	0.149038	-0.44006
Chr10_7260001_7280000	Chr10	7260001	7280000	0.145462	-0.652074
Chr10_7270001_7290000	Chr10	7270001	7290000	0.127438	-0.904225
Chr10_7280001_7300000	Chr10	7280001	7300000	0.134136	-1.15852
Chr10_7290001_7310000	Chr10	7290001	7310000	0.127314	-0.762676
Chr10_7300001_7320000	Chr10	7300001	7320000	0.108661	-0.526551
Chr10_7310001_7330000	Chr10	7310001	7330000	0.106893	-0.493934
Chr10_7320001_7340000	Chr10	7320001	7340000	0.143646	-0.379493
Chr10_7330001_7350000	Chr10	7330001	7350000	0.185124	-0.115225
Chr10_7340001_7360000	Chr10	7340001	7360000	0.154641	-0.0346972
Chr10_7350001_7370000	Chr10	7350001	7370000	0.113901	-0.177974
Chr10_7360001_7380000	Chr10	7360001	7380000	0.147743	-0.495456
Chr10_7370001_7390000	Chr10	7370001	7390000	0.147796	-0.436478
Chr10_7380001_7400000	Chr10	7380001	7400000	0.143978	-0.395226
Chr10_7390001_7410000	Chr10	7390001	7410000	0.136143	-0.373342
Chr10_7400001_7420000	Chr10	7400001	7420000	0.0975625	-0.152769
Chr10_7410001_7430000	Chr10	7410001	7430000	0.0922349	0.0921516
Chr10_7420001_7440000	Chr10	7420001	7440000	0.126222	0.0811216
Chr10_7430001_7450000	Chr10	7430001	7450000	0.146129	-0.157673
Chr10_7440001_7460000	Chr10	7440001	7460000	0.129075	-0.255983
Chr10_7450001_7470000	Chr10	7450001	7470000	0.102366	-0.380963
Chr10_7460001_7480000	Chr10	7460001	7480000	0.12086	-0.355414
Chr10_7470001_7490000	Chr10	7470001	7490000	0.166287	-0.343474
Chr10_7480001_7500000	Chr10	7480001	7500000	0.198558	-0.802211
Chr10_7490001_7510000	Chr10	7490001	7510000	0.212418	-1.19702
Chr10_7500001_7520000	Chr10	7500001	7520000	0.213725	-1.07415
Chr10_7510001_7530000	Chr10	7510001	7530000	0.194827	-0.487682
Chr10_7520001_7540000	Chr10	7520001	7540000	0.191573	-0.312441
Chr10_7530001_7550000	Chr10	7530001	7550000	0.198407	-0.4349
Chr10_7540001_7560000	Chr10	7540001	7560000	0.140719	-0.0884151
Chr10_7550001_7570000	Chr10	7550001	7570000	0.148079	-0.239079
Chr10_7560001_7580000	Chr10	7560001	7580000	0.141288	-0.52424
Chr10_7570001_7590000	Chr10	7570001	7590000	0.170498	-1.10737
Chr10_7580001_7600000	Chr10	7580001	7600000	0.177237	-0.311919
Chr10_7590001_7610000	Chr10	7590001	7610000	0.131506	-0.097311
Chr10_7600001_7620000	Chr10	7600001	7620000	0.157161	-0.756987
Chr10_7610001_7630000	Chr10	7610001	7630000	0.214566	-0.81478
Chr10_7620001_7640000	Chr10	7620001	7640000	0.192418	-0.831551
Chr10_7630001_7650000	Chr10	7630001	7650000	0.18313	-1.11902
Chr10_7640001_7660000	Chr10	7640001	7660000	0.197092	-0.931425
Chr10_7650001_7670000	Chr10	7650001	7670000	0.248444	-0.856462
Chr10_7660001_7680000	Chr10	7660001	7680000	0.330962	-1.28718
Chr10_7670001_7690000	Chr10	7670001	7690000	0.318912	-0.906459
Chr10_7680001_7700000	Chr10	7680001	7700000	0.303486	-0.866828
Chr10_7690001_7710000	Chr10	7690001	7710000	0.249508	-0.529468
Chr10_7700001_7720000	Chr10	7700001	7720000	0.186835	-0.362633
Chr10_7710001_7730000	Chr10	7710001	7730000	0.178554	-0.768896
Chr10_7720001_7740000	Chr10	7720001	7740000	0.146839	-1.09263
Chr10_7730001_7750000	Chr10	7730001	7750000	0.135982	-0.861056
Chr10_7740001_7760000	Chr10	7740001	7760000	0.140178	-0.581887
Chr10_7750001_7770000	Chr10	7750001	7770000	0.172843	-0.562333
Chr10_7760001_7780000	Chr10	7760001	7780000	0.211094	-0.519914
Chr10_7770001_7790000	Chr10	7770001	7790000	0.238323	-0.445306
Chr10_7780001_7800000	Chr10	7780001	7800000	0.179833	-0.233311
Chr10_7790001_7810000	Chr10	7790001	7810000	0.197166	-0.201294
Chr10_7800001_7820000	Chr10	7800001	7820000	0.231949	-0.377427
Chr10_7810001_7830000	Chr10	7810001	7830000	0.242075	-0.454756
Chr10_7820001_7840000	Chr10	7820001	7840000	0.224374	-0.431184
Chr10_7830001_7850000	Chr10	7830001	7850000	0.110911	-0.180771
Chr10_7840001_7860000	Chr10	7840001	7860000	0.0937204	-0.195943
Chr10_7850001_7870000	Chr10	7850001	7870000	0.222621	-0.495537
Chr10_7860001_7880000	Chr10	7860001	7880000	0.366684	-0.935481
Chr10_7870001_7890000	Chr10	7870001	7890000	0.320924	-1.0645
Chr10_7880001_7900000	Chr10	7880001	7900000	0.227805	-0.609382
Chr10_7890001_7910000	Chr10	7890001	7910000	0.201371	-0.248038
Chr10_7900001_7920000	Chr10	7900001	7920000	0.197052	-0.304489
Chr10_7910001_7930000	Chr10	7910001	7930000	0.240996	-0.613709
Chr10_7920001_7940000	Chr10	7920001	7940000	0.232378	-0.403503
Chr10_7930001_7950000	Chr10	7930001	7950000	0.178731	-0.0305262
Chr10_7940001_7960000	Chr10	7940001	7960000	0.207985	-0.445719
Chr10_7950001_7970000	Chr10	7950001	7970000	0.320108	-1.53831
Chr10_7960001_7980000	Chr10	7960001	7980000	0.304043	-1.24209
Chr10_7970001_7990000	Chr10	7970001	7990000	0.207428	-0.314337
Chr10_7980001_8000000	Chr10	7980001	8000000	0.222959	-0.257163
Chr10_7990001_8010000	Chr10	7990001	8010000	0.287269	-0.951719
Chr10_8000001_8020000	Chr10	8000001	8020000	0.324681	-0.935622
Chr10_8010001_8030000	Chr10	8010001	8030000	0.252312	-0.838707
Chr10_8020001_8040000	Chr10	8020001	8040000	0.193319	-1.05082
Chr10_8030001_8050000	Chr10	8030001	8050000	0.265927	-1.27501
Chr10_8040001_8060000	Chr10	8040001	8060000	0.328273	-1.42023
Chr10_8050001_8070000	Chr10	8050001	8070000	0.222373	-0.915072
Chr10_8060001_8080000	Chr10	8060001	8080000	0.166425	-0.465496
Chr10_8070001_8090000	Chr10	8070001	8090000	0.224419	-0.670866
Chr10_8080001_8100000	Chr10	8080001	8100000	0.242487	-0.97356
Chr10_8090001_8110000	Chr10	8090001	8110000	0.214068	-0.675143
Chr10_8100001_8120000	Chr10	8100001	8120000	0.205265	-0.591706
Chr10_8110001_8130000	Chr10	8110001	8130000	0.173705	0.275526
Chr10_8120001_8140000	Chr10	8120001	8140000	0.155194	0.337303
Chr10_8130001_8150000	Chr10	8130001	8150000	0.135643	-0.0552909
Chr10_8140001_8160000	Chr10	8140001	8160000	0.140893	-0.280352
Chr10_8150001_8170000	Chr10	8150001	8170000	0.139503	-0.429463
Chr10_8160001_8180000	Chr10	8160001	8180000	0.136469	-0.237664
Chr10_8170001_8190000	Chr10	8170001	8190000	0.177695	-0.435733
Chr10_8180001_8200000	Chr10	8180001	8200000	0.28325	-0.969374
Chr10_8190001_8210000	Chr10	8190001	8210000	0.316218	-1.27177
Chr10_8200001_8220000	Chr10	8200001	8220000	0.267506	-1.24728
Chr10_8210001_8230000	Chr10	8210001	8230000	0.285194	-1.33609
Chr10_8220001_8240000	Chr10	8220001	8240000	0.247822	-1.31813
Chr10_8230001_8250000	Chr10	8230001	8250000	0.188194	-0.759021
Chr10_8240001_8260000	Chr10	8240001	8260000	0.181664	-0.269716
Chr10_8250001_8270000	Chr10	8250001	8270000	0.17586	-0.12745
Chr10_8260001_8280000	Chr10	8260001	8280000	0.182982	-0.365055
Chr10_8270001_8290000	Chr10	8270001	8290000	0.224009	-1.04888
Chr10_8280001_8300000	Chr10	8280001	8300000	0.206297	-0.875248
Chr10_8290001_8310000	Chr10	8290001	8310000	0.144274	-0.355445
Chr10_8300001_8320000	Chr10	8300001	8320000	0.118468	-0.16445
Chr10_8310001_8330000	Chr10	8310001	8330000	0.11188	-0.0820605
Chr10_8320001_8340000	Chr10	8320001	8340000	0.116662	-0.185728
Chr10_8330001_8350000	Chr10	8330001	8350000	0.2283	-0.830329
Chr10_8340001_8360000	Chr10	8340001	8360000	0.319451	-1.46189
Chr10_8350001_8370000	Chr10	8350001	8370000	0.285187	-0.797028
Chr10_8360001_8380000	Chr10	8360001	8380000	0.292816	-0.438734
Chr10_8370001_8390000	Chr10	8370001	8390000	0.349837	-0.910903
Chr10_8380001_8400000	Chr10	8380001	8400000	0.400788	-1.74107
Chr10_8390001_8410000	Chr10	8390001	8410000	0.421771	-1.73301
Chr10_8400001_8420000	Chr10	8400001	8420000	0.350546	-0.93302
Chr10_8410001_8430000	Chr10	8410001	8430000	0.315354	-0.313885
Chr10_8420001_8440000	Chr10	8420001	8440000	0.345513	0.170657
Chr10_8430001_8450000	Chr10	8430001	8450000	0.302485	-0.0107794
Chr10_8440001_8460000	Chr10	8440001	8460000	0.276253	-0.999264
Chr10_8450001_8470000	Chr10	8450001	8470000	0.245918	-0.625348
Chr10_8460001_8480000	Chr10	8460001	8480000	0.201031	-0.361594
Chr10_8470001_8490000	Chr10	8470001	8490000	0.179863	-0.445733
Chr10_8480001_8500000	Chr10	8480001	8500000	0.184353	-0.285557
Chr10_8490001_8510000	Chr10	8490001	8510000	0.204084	-0.339391
Chr10_8500001_8520000	Chr10	8500001	8520000	0.2378	-0.864607
Chr10_8510001_8530000	Chr10	8510001	8530000	0.272281	-0.963953
Chr10_8520001_8540000	Chr10	8520001	8540000	0.23169	-0.688245
Chr10_8530001_8550000	Chr10	8530001	8550000	0.164631	-0.668684
Chr10_8540001_8560000	Chr10	8540001	8560000	0.167633	-0.695377
Chr10_8550001_8570000	Chr10	8550001	8570000	0.138725	-0.513803
Chr10_8560001_8580000	Chr10	8560001	8580000	0.14227	-0.440579
Chr10_8570001_8590000	Chr10	8570001	8590000	0.16543	-0.935247
Chr10_8580001_8600000	Chr10	8580001	8600000	0.18608	-1.39538
Chr10_8590001_8610000	Chr10	8590001	8610000	0.238884	-1.55838
Chr10_8600001_8620000	Chr10	8600001	8620000	0.211069	-1.35644
Chr10_8610001_8630000	Chr10	8610001	8630000	0.158891	-1.08586
Chr10_8620001_8640000	Chr10	8620001	8640000	0.135872	-0.758103
Chr10_8630001_8650000	Chr10	8630001	8650000	0.109267	-0.479402
Chr10_8640001_8660000	Chr10	8640001	8660000	0.119963	-0.681967
Chr10_8650001_8670000	Chr10	8650001	8670000	0.150579	-1.22177
Chr10_8660001_8680000	Chr10	8660001	8680000	0.122424	-1.1122
Chr10_8670001_8690000	Chr10	8670001	8690000	0.0989275	-0.794597
Chr10_8680001_8700000	Chr10	8680001	8700000	0.199885	-1.23197
Chr10_8690001_8710000	Chr10	8690001	8710000	0.252615	-1.87735
Chr10_8700001_8720000	Chr10	8700001	8720000	0.262715	-1.70433
Chr10_8710001_8730000	Chr10	8710001	8730000	0.37379	-1.82781
Chr10_8720001_8740000	Chr10	8720001	8740000	0.405118	-2.00154
Chr10_8730001_8750000	Chr10	8730001	8750000	0.301904	-1.8284
Chr10_8740001_8760000	Chr10	8740001	8760000	0.228433	-1.75508
Chr10_8750001_8770000	Chr10	8750001	8770000	0.172919	-1.81288
Chr10_8760001_8780000	Chr10	8760001	8780000	0.129194	-1.40835
Chr10_8770001_8790000	Chr10	8770001	8790000	0.112341	-0.562175
Chr10_8780001_8800000	Chr10	8780001	8800000	0.108416	-0.534536
Chr10_8790001_8810000	Chr10	8790001	8810000	0.193115	-0.992013
Chr10_8800001_8820000	Chr10	8800001	8820000	0.317377	-0.857503
Chr10_8810001_8830000	Chr10	8810001	8830000	0.311309	-0.769629
Chr10_8820001_8840000	Chr10	8820001	8840000	0.287462	-0.95712
Chr10_8830001_8850000	Chr10	8830001	8850000	0.200931	-0.475211
Chr10_8840001_8860000	Chr10	8840001	8860000	0.19599	-0.638485
Chr10_8850001_8870000	Chr10	8850001	8870000	0.237592	-1.14252
Chr10_8860001_8880000	Chr10	8860001	8880000	0.196938	-0.769716
Chr10_8870001_8890000	Chr10	8870001	8890000	0.193762	-0.656225
Chr10_8880001_8900000	Chr10	8880001	8900000	0.218318	-1.00617
Chr10_8890001_8910000	Chr10	8890001	8910000	0.198062	-0.957359
Chr10_8900001_8920000	Chr10	8900001	8920000	0.14967	-0.722488
Chr10_8910001_8930000	Chr10	8910001	8930000	0.182578	-0.751801
Chr10_8920001_8940000	Chr10	8920001	8940000	0.262261	-1.24695
Chr10_8930001_8950000	Chr10	8930001	8950000	0.334449	-1.61065
Chr10_8940001_8960000	Chr10	8940001	8960000	0.39099	-1.54709
Chr10_8950001_8970000	Chr10	8950001	8970000	0.384853	-1.94636
Chr10_8960001_8980000	Chr10	8960001	8980000	0.29715	-2.01118
Chr10_8970001_8990000	Chr10	8970001	8990000	0.211886	-1.91692
Chr10_8980001_9000000	Chr10	8980001	9000000	0.29676	-2.14262
Chr10_8990001_9010000	Chr10	8990001	9010000	0.347248	-2.26888
Chr10_9000001_9020000	Chr10	9000001	9020000	0.307037	-2.33681
Chr10_9010001_9030000	Chr10	9010001	9030000	0.234979	-2.15312
Chr10_9020001_9040000	Chr10	9020001	9040000	0.180209	-1.52071
Chr10_9030001_9050000	Chr10	9030001	9050000	0.189638	-1.05487
Chr10_9040001_9060000	Chr10	9040001	9060000	0.18612	-0.424507
Chr10_9050001_9070000	Chr10	9050001	9070000	0.236908	-0.62635
Chr10_9060001_9080000	Chr10	9060001	9080000	0.341763	-1.57463
Chr10_9070001_9090000	Chr10	9070001	9090000	0.332702	-1.57601
Chr10_9080001_9100000	Chr10	9080001	9100000	0.306949	-0.834765
Chr10_9090001_9110000	Chr10	9090001	9110000	0.283461	-0.723317
Chr10_9100001_9120000	Chr10	9100001	9120000	0.25212	-0.83697
Chr10_9110001_9130000	Chr10	9110001	9130000	0.244214	-0.862264
Chr10_9120001_9140000	Chr10	9120001	9140000	0.191764	-0.815879
Chr10_9130001_9150000	Chr10	9130001	9150000	0.188303	-0.750923
Chr10_9140001_9160000	Chr10	9140001	9160000	0.215183	-0.392517
Chr10_9150001_9170000	Chr10	9150001	9170000	0.241422	-0.703475
Chr10_9160001_9180000	Chr10	9160001	9180000	0.251373	-0.973683
Chr10_9170001_9190000	Chr10	9170001	9190000	0.222838	-0.425987
Chr10_9180001_9200000	Chr10	9180001	9200000	0.141001	-0.150185
Chr10_9190001_9210000	Chr10	9190001	9210000	0.144407	-0.0565972
Chr10_9200001_9220000	Chr10	9200001	9220000	0.195528	-0.0360392
Chr10_9210001_9230000	Chr10	9210001	9230000	0.174595	-0.00555457
Chr10_9220001_9240000	Chr10	9220001	9240000	0.138703	-0.0479035
Chr10_9230001_9250000	Chr10	9230001	9250000	0.133513	-0.225376
Chr10_9240001_9260000	Chr10	9240001	9260000	0.173325	-0.19097
Chr10_9250001_9270000	Chr10	9250001	9270000	0.198104	-0.137988
Chr10_9260001_9280000	Chr10	9260001	9280000	0.230548	-0.354183
Chr10_9270001_9290000	Chr10	9270001	9290000	0.260055	-0.831606
Chr10_9280001_9300000	Chr10	9280001	9300000	0.184273	-0.886191
Chr10_9290001_9310000	Chr10	9290001	9310000	0.137241	-0.61244
Chr10_9300001_9320000	Chr10	9300001	9320000	0.150292	-0.435874
Chr10_9310001_9330000	Chr10	9310001	9330000	0.182517	-0.4197
Chr10_9320001_9340000	Chr10	9320001	9340000	0.181189	-0.533641
Chr10_9330001_9350000	Chr10	9330001	9350000	0.1444	-0.310266
Chr10_9340001_9360000	Chr10	9340001	9360000	0.170861	-0.354149
Chr10_9350001_9370000	Chr10	9350001	9370000	0.262457	-0.830148
Chr10_9360001_9380000	Chr10	9360001	9380000	0.299243	-1.36007
Chr10_9370001_9390000	Chr10	9370001	9390000	0.255506	-0.781429
Chr10_9380001_9400000	Chr10	9380001	9400000	0.219461	-0.403773
Chr10_9390001_9410000	Chr10	9390001	9410000	0.178569	-0.800161
Chr10_9400001_9420000	Chr10	9400001	9420000	0.198492	-1.39102
Chr10_9410001_9430000	Chr10	9410001	9430000	0.266631	-1.3757
Chr10_9420001_9440000	Chr10	9420001	9440000	0.324901	-1.42821
Chr10_9430001_9450000	Chr10	9430001	9450000	0.322955	-1.4582
Chr10_9440001_9460000	Chr10	9440001	9460000	0.241725	-1.2222
Chr10_9450001_9470000	Chr10	9450001	9470000	0.268119	-1.5086
Chr10_9460001_9480000	Chr10	9460001	9480000	0.273411	-1.66287
Chr10_9470001_9490000	Chr10	9470001	9490000	0.223685	-1.30519
Chr10_9480001_9500000	Chr10	9480001	9500000	0.176519	-0.845312
Chr10_9490001_9510000	Chr10	9490001	9510000	0.139521	-0.395456
Chr10_9500001_9520000	Chr10	9500001	9520000	0.181892	-0.342044
Chr10_9510001_9530000	Chr10	9510001	9530000	0.192905	-0.493822
Chr10_9520001_9540000	Chr10	9520001	9540000	0.16634	-0.661435
Chr10_9530001_9550000	Chr10	9530001	9550000	0.186799	-0.545153
Chr10_9540001_9560000	Chr10	9540001	9560000	0.240373	-0.592715
Chr10_9550001_9570000	Chr10	9550001	9570000	0.192028	-0.755005
Chr10_9560001_9580000	Chr10	9560001	9580000	0.186095	-0.847212
Chr10_9570001_9590000	Chr10	9570001	9590000	0.193627	-0.893893
Chr10_9580001_9600000	Chr10	9580001	9600000	0.197768	-0.747442
Chr10_9590001_9610000	Chr10	9590001	9610000	0.204786	-1.19081
Chr10_9600001_9620000	Chr10	9600001	9620000	0.153544	-0.84225
Chr10_9610001_9630000	Chr10	9610001	9630000	0.147841	-0.728957
Chr10_9620001_9640000	Chr10	9620001	9640000	0.163987	-0.940556
Chr10_9630001_9650000	Chr10	9630001	9650000	0.147918	-0.673939
Chr10_9640001_9660000	Chr10	9640001	9660000	0.159064	-0.960857
Chr10_9650001_9670000	Chr10	9650001	9670000	0.14031	-0.760159
Chr10_9660001_9680000	Chr10	9660001	9680000	0.101754	-0.377963
Chr10_9670001_9690000	Chr10	9670001	9690000	0.163009	-0.627719
Chr10_9680001_9700000	Chr10	9680001	9700000	0.219794	-1.05562
Chr10_9690001_9710000	Chr10	9690001	9710000	0.251579	-1.31618
Chr10_9700001_9720000	Chr10	9700001	9720000	0.227549	-1.15054
Chr10_9710001_9730000	Chr10	9710001	9730000	0.157033	-1.10053
Chr10_9720001_9740000	Chr10	9720001	9740000	0.158674	-0.963552
Chr10_9730001_9750000	Chr10	9730001	9750000	0.16206	-0.286618
Chr10_9740001_9760000	Chr10	9740001	9760000	0.156491	-0.124762
Chr10_9750001_9770000	Chr10	9750001	9770000	0.16355	-0.364803
Chr10_9760001_9780000	Chr10	9760001	9780000	0.1732	-0.469932
Chr10_9770001_9790000	Chr10	9770001	9790000	0.169217	-0.479509
Chr10_9780001_9800000	Chr10	9780001	9800000	0.166446	-0.772245
Chr10_9790001_9810000	Chr10	9790001	9810000	0.195232	-1.19714
Chr10_9800001_9820000	Chr10	9800001	9820000	0.209602	-1.50353
Chr10_9810001_9830000	Chr10	9810001	9830000	0.161644	-1.55716
Chr10_9820001_9840000	Chr10	9820001	9840000	0.175366	-1.44085
Chr10_9830001_9850000	Chr10	9830001	9850000	0.257071	-1.65114
Chr10_9840001_9860000	Chr10	9840001	9860000	0.236758	-1.17295
Chr10_9850001_9870000	Chr10	9850001	9870000	0.170659	-0.731566
Chr10_9860001_9880000	Chr10	9860001	9880000	0.157896	-0.454556
Chr10_9870001_9890000	Chr10	9870001	9890000	0.185655	-0.168408
Chr10_9880001_9900000	Chr10	9880001	9900000	0.185911	0.014269
Chr10_9890001_9910000	Chr10	9890001	9910000	0.178566	-0.205301
Chr10_9900001_9920000	Chr10	9900001	9920000	0.211109	-0.383157
Chr10_9910001_9930000	Chr10	9910001	9930000	0.230963	-0.530238
Chr10_9920001_9940000	Chr10	9920001	9940000	0.166575	-0.834715
Chr10_9930001_9950000	Chr10	9930001	9950000	0.133342	-0.878761
Chr10_9940001_9960000	Chr10	9940001	9960000	0.0929164	-0.0100945
Chr10_9950001_9970000	Chr10	9950001	9970000	0.0766398	0.0849238
Chr10_9960001_9980000	Chr10	9960001	9980000	0.0850042	0.0875949
Chr10_9970001_9990000	Chr10	9970001	9990000	0.129104	-0.164583
Chr10_9980001_10000000	Chr10	9980001	10000000	0.166225	-0.393257
Chr10_9990001_10010000	Chr10	9990001	10010000	0.185386	-0.621116
Chr10_10000001_10020000	Chr10	10000001	10020000	0.176379	-1.28605
Chr10_10010001_10030000	Chr10	10010001	10030000	0.16404	-1.45866
Chr10_10020001_10040000	Chr10	10020001	10040000	0.19266	-1.53081
Chr10_10030001_10050000	Chr10	10030001	10050000	0.156642	-0.930337
Chr10_10040001_10060000	Chr10	10040001	10060000	0.117826	-0.263936
Chr10_10050001_10070000	Chr10	10050001	10070000	0.208782	-0.649956
Chr10_10060001_10080000	Chr10	10060001	10080000	0.25308	-0.89977
Chr10_10070001_10090000	Chr10	10070001	10090000	0.157538	-0.477914
Chr10_10080001_10100000	Chr10	10080001	10100000	0.119975	-0.22925
Chr10_10090001_10110000	Chr10	10090001	10110000	0.142332	-0.0916641
Chr10_10100001_10120000	Chr10	10100001	10120000	0.25329	-0.351498
Chr10_10110001_10130000	Chr10	10110001	10130000	0.256624	-0.806314
Chr10_10120001_10140000	Chr10	10120001	10140000	0.194412	-1.39202
Chr10_10130001_10150000	Chr10	10130001	10150000	0.125623	-1.24597
Chr10_10140001_10160000	Chr10	10140001	10160000	0.0921579	-0.58729
Chr10_10150001_10170000	Chr10	10150001	10170000	0.0632736	-0.231704
Chr10_10160001_10180000	Chr10	10160001	10180000	0.07934	-0.29792
Chr10_10170001_10190000	Chr10	10170001	10190000	0.14288	-0.376015
Chr10_10180001_10200000	Chr10	10180001	10200000	0.203531	-0.367419
Chr10_10190001_10210000	Chr10	10190001	10210000	0.169201	-0.289172
Chr10_10200001_10220000	Chr10	10200001	10220000	0.123577	-0.131557
Chr10_10210001_10230000	Chr10	10210001	10230000	0.13871	-0.271756
Chr10_10220001_10240000	Chr10	10220001	10240000	0.14695	-0.269259
Chr10_10230001_10250000	Chr10	10230001	10250000	0.17432	-0.365101
Chr10_10240001_10260000	Chr10	10240001	10260000	0.244627	-1.21235
Chr10_10250001_10270000	Chr10	10250001	10270000	0.190979	-1.26097
Chr10_10260001_10280000	Chr10	10260001	10280000	0.10347	-0.628943
Chr10_10270001_10290000	Chr10	10270001	10290000	0.10066	-0.281573
Chr10_10280001_10300000	Chr10	10280001	10300000	0.093547	-0.179948
Chr10_10290001_10310000	Chr10	10290001	10310000	0.124822	-0.43249
Chr10_10300001_10320000	Chr10	10300001	10320000	0.134877	-0.378419
Chr10_10310001_10330000	Chr10	10310001	10330000	0.137444	-0.597081
Chr10_10320001_10340000	Chr10	10320001	10340000	0.182801	-0.94567
Chr10_10330001_10350000	Chr10	10330001	10350000	0.197269	-1.03334
Chr10_10340001_10360000	Chr10	10340001	10360000	0.177997	-0.770772
Chr10_10350001_10370000	Chr10	10350001	10370000	0.153751	-0.57544
Chr10_10360001_10380000	Chr10	10360001	10380000	0.167838	-0.927874
Chr10_10370001_10390000	Chr10	10370001	10390000	0.202354	-1.15905
Chr10_10380001_10400000	Chr10	10380001	10400000	0.170521	-0.773122
Chr10_10390001_10410000	Chr10	10390001	10410000	0.141156	-0.590682
Chr10_10400001_10420000	Chr10	10400001	10420000	0.124812	-0.571619
Chr10_10410001_10430000	Chr10	10410001	10430000	0.100266	-0.781141
Chr10_10420001_10440000	Chr10	10420001	10440000	0.16102	-0.836898
Chr10_10430001_10450000	Chr10	10430001	10450000	0.20308	-0.8539
Chr10_10440001_10460000	Chr10	10440001	10460000	0.201808	-0.907499
Chr10_10450001_10470000	Chr10	10450001	10470000	0.162139	-0.715939
Chr10_10460001_10480000	Chr10	10460001	10480000	0.119019	-0.52387
Chr10_10470001_10490000	Chr10	10470001	10490000	0.121286	-0.683533
Chr10_10480001_10500000	Chr10	10480001	10500000	0.17169	-1.7979
Chr10_10490001_10510000	Chr10	10490001	10510000	0.232937	-2.29696
Chr10_10500001_10520000	Chr10	10500001	10520000	0.233533	-1.88503
Chr10_10510001_10530000	Chr10	10510001	10530000	0.195919	-1.16235
Chr10_10520001_10540000	Chr10	10520001	10540000	0.1918	-0.882147
Chr10_10530001_10550000	Chr10	10530001	10550000	0.235573	-0.903711
Chr10_10540001_10560000	Chr10	10540001	10560000	0.250168	-1.02135
Chr10_10550001_10570000	Chr10	10550001	10570000	0.192794	-1.46207
Chr10_10560001_10580000	Chr10	10560001	10580000	0.173584	-1.18041
Chr10_10570001_10590000	Chr10	10570001	10590000	0.182748	-1.08196
Chr10_10580001_10600000	Chr10	10580001	10600000	0.176879	-0.792169
Chr10_10590001_10610000	Chr10	10590001	10610000	0.171053	-0.39552
Chr10_10600001_10620000	Chr10	10600001	10620000	0.167715	-0.343441
Chr10_10610001_10630000	Chr10	10610001	10630000	0.16798	-0.432124
Chr10_10620001_10640000	Chr10	10620001	10640000	0.147462	-0.435535
Chr10_10630001_10650000	Chr10	10630001	10650000	0.118805	-0.257414
Chr10_10640001_10660000	Chr10	10640001	10660000	0.145928	-0.239512
Chr10_10650001_10670000	Chr10	10650001	10670000	0.197141	-0.371031
Chr10_10660001_10680000	Chr10	10660001	10680000	0.288434	-0.772531
Chr10_10670001_10690000	Chr10	10670001	10690000	0.246536	-0.481933
Chr10_10680001_10700000	Chr10	10680001	10700000	0.155567	-0.218746
Chr10_10690001_10710000	Chr10	10690001	10710000	0.107598	-0.259954
Chr10_10700001_10720000	Chr10	10700001	10720000	0.13069	-0.436689
Chr10_10710001_10730000	Chr10	10710001	10730000	0.141167	-0.531727
Chr10_10720001_10740000	Chr10	10720001	10740000	0.115148	-0.271138
Chr10_10730001_10750000	Chr10	10730001	10750000	0.117495	-0.335654
Chr10_10740001_10760000	Chr10	10740001	10760000	0.143076	-0.650247
Chr10_10750001_10770000	Chr10	10750001	10770000	0.175009	-0.555745
Chr10_10760001_10780000	Chr10	10760001	10780000	0.189701	-0.421331
Chr10_10770001_10790000	Chr10	10770001	10790000	0.208635	-0.256488
Chr10_10780001_10800000	Chr10	10780001	10800000	0.223273	-0.212174
Chr10_10790001_10810000	Chr10	10790001	10810000	0.201874	-0.126512
Chr10_10800001_10820000	Chr10	10800001	10820000	0.16134	0.0967609
Chr10_10810001_10830000	Chr10	10810001	10830000	0.15253	-0.0469236
Chr10_10820001_10840000	Chr10	10820001	10840000	0.158071	-0.368427
Chr10_10830001_10850000	Chr10	10830001	10850000	0.149016	-0.206028
Chr10_10840001_10860000	Chr10	10840001	10860000	0.171396	-0.421689
Chr10_10850001_10870000	Chr10	10850001	10870000	0.23301	-0.941559
Chr10_10860001_10880000	Chr10	10860001	10880000	0.247032	-1.20186
Chr10_10870001_10890000	Chr10	10870001	10890000	0.209488	-1.19968
Chr10_10880001_10900000	Chr10	10880001	10900000	0.180693	-1.15483
Chr10_10890001_10910000	Chr10	10890001	10910000	0.10691	-0.473216
Chr10_10900001_10920000	Chr10	10900001	10920000	0.0829527	-0.541482
Chr10_10910001_10930000	Chr10	10910001	10930000	0.12844	-0.607391
Chr10_10920001_10940000	Chr10	10920001	10940000	0.168657	-0.437435
Chr10_10930001_10950000	Chr10	10930001	10950000	0.156639	-0.56856
Chr10_10940001_10960000	Chr10	10940001	10960000	0.175447	-1.42467
Chr10_10950001_10970000	Chr10	10950001	10970000	0.190649	-1.4983
Chr10_10960001_10980000	Chr10	10960001	10980000	0.188437	-0.964409
Chr10_10970001_10990000	Chr10	10970001	10990000	0.184011	-0.910374
Chr10_10980001_11000000	Chr10	10980001	11000000	0.146813	-0.514752
Chr10_10990001_11010000	Chr10	10990001	11010000	0.136065	-0.119611
Chr10_11000001_11020000	Chr10	11000001	11020000	0.190555	-0.0465855
Chr10_11010001_11030000	Chr10	11010001	11030000	0.196558	0.0200711
Chr10_11020001_11040000	Chr10	11020001	11040000	0.119611	0.113319
Chr10_11030001_11050000	Chr10	11030001	11050000	0.150962	-0.143265
Chr10_11040001_11060000	Chr10	11040001	11060000	0.203039	-0.372574
Chr10_11050001_11070000	Chr10	11050001	11070000	0.181951	-0.311993
Chr10_11060001_11080000	Chr10	11060001	11080000	0.174993	-0.547073
Chr10_11070001_11090000	Chr10	11070001	11090000	0.210806	-1.26114
Chr10_11080001_11100000	Chr10	11080001	11100000	0.207838	-1.21387
Chr10_11090001_11110000	Chr10	11090001	11110000	0.20783	-0.764543
Chr10_11100001_11120000	Chr10	11100001	11120000	0.250799	-0.778165
Chr10_11110001_11130000	Chr10	11110001	11130000	0.191036	-0.722389
Chr10_11120001_11140000	Chr10	11120001	11140000	0.164282	-0.551486
Chr10_11130001_11150000	Chr10	11130001	11150000	0.198485	-0.438432
Chr10_11140001_11160000	Chr10	11140001	11160000	0.204903	-0.475922
Chr10_11150001_11170000	Chr10	11150001	11170000	0.192609	-0.765435
Chr10_11160001_11180000	Chr10	11160001	11180000	0.234053	-1.26915
Chr10_11170001_11190000	Chr10	11170001	11190000	0.222764	-1.29848
Chr10_11180001_11200000	Chr10	11180001	11200000	0.184797	-1.20171
Chr10_11190001_11210000	Chr10	11190001	11210000	0.183159	-0.65154
Chr10_11200001_11220000	Chr10	11200001	11220000	0.177933	-0.35843
Chr10_11210001_11230000	Chr10	11210001	11230000	0.263328	-0.893228
Chr10_11220001_11240000	Chr10	11220001	11240000	0.293382	-1.42501
Chr10_11230001_11250000	Chr10	11230001	11250000	0.26847	-1.53282
Chr10_11240001_11260000	Chr10	11240001	11260000	0.241388	-1.53658
Chr10_11250001_11270000	Chr10	11250001	11270000	0.248358	-1.53691
Chr10_11260001_11280000	Chr10	11260001	11280000	0.209597	-1.44631
Chr10_11270001_11290000	Chr10	11270001	11290000	0.157901	-1.08987
Chr10_11280001_11300000	Chr10	11280001	11300000	0.189328	-1.0349
Chr10_11290001_11310000	Chr10	11290001	11310000	0.207184	-1.23643
Chr10_11300001_11320000	Chr10	11300001	11320000	0.210489	-1.44078
Chr10_11310001_11330000	Chr10	11310001	11330000	0.206703	-1.59469
Chr10_11320001_11340000	Chr10	11320001	11340000	0.167438	-1.30764
Chr10_11330001_11350000	Chr10	11330001	11350000	0.141341	-1.06266
Chr10_11340001_11360000	Chr10	11340001	11360000	0.178583	-1.18269
Chr10_11350001_11370000	Chr10	11350001	11370000	0.228403	-1.30428
Chr10_11360001_11380000	Chr10	11360001	11380000	0.243153	-1.40334
Chr10_11370001_11390000	Chr10	11370001	11390000	0.202105	-1.19963
Chr10_11380001_11400000	Chr10	11380001	11400000	0.144367	-0.759031
Chr10_11390001_11410000	Chr10	11390001	11410000	0.153192	-0.766465
Chr10_11400001_11420000	Chr10	11400001	11420000	0.169219	-0.936479
Chr10_11410001_11430000	Chr10	11410001	11430000	0.185458	-0.718043
Chr10_11420001_11440000	Chr10	11420001	11440000	0.174434	-0.461788
Chr10_11430001_11450000	Chr10	11430001	11450000	0.172747	-0.341176
Chr10_11440001_11460000	Chr10	11440001	11460000	0.173811	-0.44127
Chr10_11450001_11470000	Chr10	11450001	11470000	0.155017	-0.497889
Chr10_11460001_11480000	Chr10	11460001	11480000	0.188829	-0.660308
Chr10_11470001_11490000	Chr10	11470001	11490000	0.199182	-0.848918
Chr10_11480001_11500000	Chr10	11480001	11500000	0.172368	-0.561315
Chr10_11490001_11510000	Chr10	11490001	11510000	0.153933	-0.263453
Chr10_11500001_11520000	Chr10	11500001	11520000	0.139037	-0.120392
Chr10_11510001_11530000	Chr10	11510001	11530000	0.192411	-0.264465
Chr10_11520001_11540000	Chr10	11520001	11540000	0.193146	-0.197166
Chr10_11530001_11550000	Chr10	11530001	11550000	0.147177	-0.110778
Chr10_11540001_11560000	Chr10	11540001	11560000	0.142378	-0.23294
Chr10_11550001_11570000	Chr10	11550001	11570000	0.149739	-0.281822
Chr10_11560001_11580000	Chr10	11560001	11580000	0.133691	-0.148011
Chr10_11570001_11590000	Chr10	11570001	11590000	0.124331	-0.183994
Chr10_11580001_11600000	Chr10	11580001	11600000	0.126334	-0.314996
Chr10_11590001_11610000	Chr10	11590001	11610000	0.160035	-0.672666
Chr10_11600001_11620000	Chr10	11600001	11620000	0.224543	-1.01147
Chr10_11610001_11630000	Chr10	11610001	11630000	0.258551	-1.0217
Chr10_11620001_11640000	Chr10	11620001	11640000	0.320432	-1.03326
Chr10_11630001_11650000	Chr10	11630001	11650000	0.291567	-1.00724
Chr10_11640001_11660000	Chr10	11640001	11660000	0.218413	-0.540668
Chr10_11650001_11670000	Chr10	11650001	11670000	0.217888	-0.361074
Chr10_11660001_11680000	Chr10	11660001	11680000	0.203213	-0.657793
Chr10_11670001_11690000	Chr10	11670001	11690000	0.172708	-0.695433
Chr10_11680001_11700000	Chr10	11680001	11700000	0.142666	-0.219951
Chr10_11690001_11710000	Chr10	11690001	11710000	0.148342	-0.321829
Chr10_11700001_11720000	Chr10	11700001	11720000	0.193332	-0.605146
Chr10_11710001_11730000	Chr10	11710001	11730000	0.254984	-0.454981
Chr10_11720001_11740000	Chr10	11720001	11740000	0.274265	-0.0649285
Chr10_11730001_11750000	Chr10	11730001	11750000	0.252165	-0.0572513
Chr10_11740001_11760000	Chr10	11740001	11760000	0.248563	-0.386446
Chr10_11750001_11770000	Chr10	11750001	11770000	0.188522	-0.347532
Chr10_11760001_11780000	Chr10	11760001	11780000	0.240957	-0.716577
Chr10_11770001_11790000	Chr10	11770001	11790000	0.334064	-0.971186
Chr10_11780001_11800000	Chr10	11780001	11800000	0.364839	-0.929088
Chr10_11790001_11810000	Chr10	11790001	11810000	0.305322	-1.22133
Chr10_11800001_11820000	Chr10	11800001	11820000	0.267817	-1.19647
Chr10_11810001_11830000	Chr10	11810001	11830000	0.182128	-1.02561
Chr10_11820001_11840000	Chr10	11820001	11840000	0.222732	-1.38744
Chr10_11830001_11850000	Chr10	11830001	11850000	0.352818	-1.81645
Chr10_11840001_11860000	Chr10	11840001	11860000	0.333703	-1.5113
Chr10_11850001_11870000	Chr10	11850001	11870000	0.295081	-1.53028
Chr10_11860001_11880000	Chr10	11860001	11880000	0.290573	-1.20901
Chr10_11870001_11890000	Chr10	11870001	11890000	0.318173	-0.365904
Chr10_11880001_11900000	Chr10	11880001	11900000	0.358303	-0.264885
Chr10_11890001_11910000	Chr10	11890001	11910000	0.385751	-1.05582
Chr10_11900001_11920000	Chr10	11900001	11920000	0.353102	-0.877312
Chr10_11910001_11930000	Chr10	11910001	11930000	0.305558	0.103834
Chr10_11920001_11940000	Chr10	11920001	11940000	0.333272	-0.40884
Chr10_11930001_11950000	Chr10	11930001	11950000	0.294382	-1.18321
Chr10_11940001_11960000	Chr10	11940001	11960000	0.24944	-0.864405
Chr10_11950001_11970000	Chr10	11950001	11970000	0.295185	-0.779987
Chr10_11960001_11980000	Chr10	11960001	11980000	0.279413	-0.758255
Chr10_11970001_11990000	Chr10	11970001	11990000	0.181071	-0.459284
Chr10_11980001_12000000	Chr10	11980001	12000000	0.21975	-0.0651735
Chr10_11990001_12010000	Chr10	11990001	12010000	0.267544	-0.205944
Chr10_12000001_12020000	Chr10	12000001	12020000	0.264994	-0.795437
Chr10_12010001_12030000	Chr10	12010001	12030000	0.253356	-1.28242
Chr10_12020001_12040000	Chr10	12020001	12040000	0.261919	-1.15113
Chr10_12030001_12050000	Chr10	12030001	12050000	0.213164	-0.799728
Chr10_12040001_12060000	Chr10	12040001	12060000	0.226097	-0.691042
Chr10_12050001_12070000	Chr10	12050001	12070000	0.294211	-0.583266
Chr10_12060001_12080000	Chr10	12060001	12080000	0.266122	-0.404089
Chr10_12070001_12090000	Chr10	12070001	12090000	0.196263	-0.251748
Chr10_12080001_12100000	Chr10	12080001	12100000	0.25067	-0.75328
Chr10_12090001_12110000	Chr10	12090001	12110000	0.305214	-0.795747
Chr10_12100001_12120000	Chr10	12100001	12120000	0.236107	-0.261541
Chr10_12110001_12130000	Chr10	12110001	12130000	0.233233	-0.346999
Chr10_12120001_12140000	Chr10	12120001	12140000	0.211229	-0.128336
Chr10_12130001_12150000	Chr10	12130001	12150000	0.124688	0.0289247
Chr10_12140001_12160000	Chr10	12140001	12160000	0.192083	-0.231001
Chr10_12150001_12170000	Chr10	12150001	12170000	0.327719	-0.799543
Chr10_12160001_12180000	Chr10	12160001	12180000	0.297856	-1.27553
Chr10_12170001_12190000	Chr10	12170001	12190000	0.280265	-1.53718
Chr10_12180001_12200000	Chr10	12180001	12200000	0.28609	-1.65093
Chr10_12190001_12210000	Chr10	12190001	12210000	0.335407	-1.73641
Chr10_12200001_12220000	Chr10	12200001	12220000	0.325611	-1.51026
Chr10_12210001_12230000	Chr10	12210001	12230000	0.274087	-1.1391
Chr10_12220001_12240000	Chr10	12220001	12240000	0.335473	-1.30797
Chr10_12230001_12250000	Chr10	12230001	12250000	0.343425	-1.47411
Chr10_12240001_12260000	Chr10	12240001	12260000	0.284841	-1.25786
Chr10_12250001_12270000	Chr10	12250001	12270000	0.299126	-0.996326
Chr10_12260001_12280000	Chr10	12260001	12280000	0.306871	-1.06766
Chr10_12270001_12290000	Chr10	12270001	12290000	0.294805	-1.42322
Chr10_12280001_12300000	Chr10	12280001	12300000	0.295994	-1.25292
Chr10_12290001_12310000	Chr10	12290001	12310000	0.240298	-0.64669
Chr10_12300001_12320000	Chr10	12300001	12320000	0.20245	-0.591931
Chr10_12310001_12330000	Chr10	12310001	12330000	0.226117	-1.15508
Chr10_12320001_12340000	Chr10	12320001	12340000	0.222749	-1.62298
Chr10_12330001_12350000	Chr10	12330001	12350000	0.21836	-1.35627
Chr10_12340001_12360000	Chr10	12340001	12360000	0.186083	-1.21761
Chr10_12350001_12370000	Chr10	12350001	12370000	0.126338	-1.05491
Chr10_12360001_12380000	Chr10	12360001	12380000	0.127257	-1.05029
Chr10_12370001_12390000	Chr10	12370001	12390000	0.142654	-0.556368
Chr10_12380001_12400000	Chr10	12380001	12400000	0.134728	-0.19056
Chr10_12390001_12410000	Chr10	12390001	12410000	0.120542	-0.216279
Chr10_12400001_12420000	Chr10	12400001	12420000	0.0961197	-0.160915
Chr10_12410001_12430000	Chr10	12410001	12430000	0.0921315	-0.154928
Chr10_12420001_12440000	Chr10	12420001	12440000	0.130886	-0.66234
Chr10_12430001_12450000	Chr10	12430001	12450000	0.148634	-0.819354
Chr10_12440001_12460000	Chr10	12440001	12460000	0.170355	-1.15461
Chr10_12450001_12470000	Chr10	12450001	12470000	0.185872	-1.78005
Chr10_12460001_12480000	Chr10	12460001	12480000	0.200015	-1.73486
Chr10_12470001_12490000	Chr10	12470001	12490000	0.21409	-1.60974
Chr10_12480001_12500000	Chr10	12480001	12500000	0.208311	-1.56727
Chr10_12490001_12510000	Chr10	12490001	12510000	0.152699	-1.07524
Chr10_12500001_12520000	Chr10	12500001	12520000	0.162039	-0.892101
Chr10_12510001_12530000	Chr10	12510001	12530000	0.286506	-1.48592
Chr10_12520001_12540000	Chr10	12520001	12540000	0.311894	-1.7818
Chr10_12530001_12550000	Chr10	12530001	12550000	0.205597	-1.50648
Chr10_12540001_12560000	Chr10	12540001	12560000	0.11296	-0.976838
Chr10_12550001_12570000	Chr10	12550001	12570000	0.0782896	-0.832291
Chr10_12560001_12580000	Chr10	12560001	12580000	0.0718247	-0.913253
Chr10_12570001_12590000	Chr10	12570001	12590000	0.0889265	-0.811591
Chr10_12580001_12600000	Chr10	12580001	12600000	0.144886	-1.02404
Chr10_12590001_12610000	Chr10	12590001	12610000	0.160682	-1.16096
Chr10_12600001_12620000	Chr10	12600001	12620000	0.118297	-0.743825
Chr10_12610001_12630000	Chr10	12610001	12630000	0.0959093	-0.416578
Chr10_12620001_12640000	Chr10	12620001	12640000	0.124091	-0.708835
Chr10_12630001_12650000	Chr10	12630001	12650000	0.14962	-1.10873
Chr10_12640001_12660000	Chr10	12640001	12660000	0.119343	-1.06754
Chr10_12650001_12670000	Chr10	12650001	12670000	0.106732	-1.1121
Chr10_12660001_12680000	Chr10	12660001	12680000	0.107487	-1.17195
Chr10_12670001_12690000	Chr10	12670001	12690000	0.0904106	-0.927686
Chr10_12680001_12700000	Chr10	12680001	12700000	0.0990453	-0.826341
Chr10_12690001_12710000	Chr10	12690001	12710000	0.107627	-0.902632
Chr10_12700001_12720000	Chr10	12700001	12720000	0.108064	-0.936375
Chr10_12710001_12730000	Chr10	12710001	12730000	0.130601	-0.884071
Chr10_12720001_12740000	Chr10	12720001	12740000	0.161574	-0.997672
Chr10_12730001_12750000	Chr10	12730001	12750000	0.147308	-1.06666
Chr10_12740001_12760000	Chr10	12740001	12760000	0.132811	-0.982592
Chr10_12750001_12770000	Chr10	12750001	12770000	0.112375	-0.579065
Chr10_12760001_12780000	Chr10	12760001	12780000	0.0647361	-0.262678
Chr10_12770001_12790000	Chr10	12770001	12790000	0.0802808	-0.412937
Chr10_12780001_12800000	Chr10	12780001	12800000	0.141412	-1.09864
Chr10_12790001_12810000	Chr10	12790001	12810000	0.167075	-1.26808
Chr10_12800001_12820000	Chr10	12800001	12820000	0.159673	-0.805003
Chr10_12810001_12830000	Chr10	12810001	12830000	0.105656	-0.508951
Chr10_12820001_12840000	Chr10	12820001	12840000	0.0891118	-0.349933
Chr10_12830001_12850000	Chr10	12830001	12850000	0.116249	-0.237019
Chr10_12840001_12860000	Chr10	12840001	12860000	0.143973	-0.57271
Chr10_12850001_12870000	Chr10	12850001	12870000	0.149841	-0.936177
Chr10_12860001_12880000	Chr10	12860001	12880000	0.166485	-0.958782
Chr10_12870001_12890000	Chr10	12870001	12890000	0.14627	-0.516603
Chr10_12880001_12900000	Chr10	12880001	12900000	0.0930564	-0.180233
Chr10_12890001_12910000	Chr10	12890001	12910000	0.0979668	0.0594122
Chr10_12900001_12920000	Chr10	12900001	12920000	0.147444	0.165137
Chr10_12910001_12930000	Chr10	12910001	12930000	0.20769	-0.18558
Chr10_12920001_12940000	Chr10	12920001	12940000	0.21794	-0.457533
Chr10_12930001_12950000	Chr10	12930001	12950000	0.219084	-0.888579
Chr10_12940001_12960000	Chr10	12940001	12960000	0.221382	-1.73038
Chr10_12950001_12970000	Chr10	12950001	12970000	0.1779	-0.90492
Chr10_12960001_12980000	Chr10	12960001	12980000	0.190023	-0.448395
Chr10_12970001_12990000	Chr10	12970001	12990000	0.176443	-0.51943
Chr10_12980001_13000000	Chr10	12980001	13000000	0.183591	-1.01581
Chr10_12990001_13010000	Chr10	12990001	13010000	0.213236	-0.743771
Chr10_13000001_13020000	Chr10	13000001	13020000	0.187344	-0.435167
Chr10_13010001_13030000	Chr10	13010001	13030000	0.209948	-0.668078
Chr10_13020001_13040000	Chr10	13020001	13040000	0.172365	-0.478823
Chr10_13030001_13050000	Chr10	13030001	13050000	0.123065	-0.211961
Chr10_13040001_13060000	Chr10	13040001	13060000	0.130965	-0.032169
Chr10_13050001_13070000	Chr10	13050001	13070000	0.160392	0.195082
Chr10_13060001_13080000	Chr10	13060001	13080000	0.203576	-0.148733
Chr10_13070001_13090000	Chr10	13070001	13090000	0.223726	-0.91393
Chr10_13080001_13100000	Chr10	13080001	13100000	0.170935	-1.01006
Chr10_13090001_13110000	Chr10	13090001	13110000	0.133214	-0.784155
Chr10_13100001_13120000	Chr10	13100001	13120000	0.153566	-0.351642
Chr10_13110001_13130000	Chr10	13110001	13130000	0.271973	-0.937721
Chr10_13120001_13140000	Chr10	13120001	13140000	0.259079	-0.985568
Chr10_13130001_13150000	Chr10	13130001	13150000	0.187119	-0.397294
Chr10_13140001_13160000	Chr10	13140001	13160000	0.141387	-0.208731
Chr10_13150001_13170000	Chr10	13150001	13170000	0.168821	-0.468792
Chr10_13160001_13180000	Chr10	13160001	13180000	0.245912	-1.28186
Chr10_13170001_13190000	Chr10	13170001	13190000	0.236831	-1.51214
Chr10_13180001_13200000	Chr10	13180001	13200000	0.237031	-1.29847
Chr10_13190001_13210000	Chr10	13190001	13210000	0.329728	-1.57144
Chr10_13200001_13220000	Chr10	13200001	13220000	0.300893	-0.994587
Chr10_13210001_13230000	Chr10	13210001	13230000	0.238669	-0.739125
Chr10_13220001_13240000	Chr10	13220001	13240000	0.225887	-1.03127
Chr10_13230001_13250000	Chr10	13230001	13250000	0.173441	-0.837649
Chr10_13240001_13260000	Chr10	13240001	13260000	0.148271	-0.705094
Chr10_13250001_13270000	Chr10	13250001	13270000	0.098583	-0.680537
Chr10_13260001_13280000	Chr10	13260001	13280000	0.125645	-0.999773
Chr10_13270001_13290000	Chr10	13270001	13290000	0.18137	-1.41433
Chr10_13280001_13300000	Chr10	13280001	13300000	0.201048	-1.45723
Chr10_13290001_13310000	Chr10	13290001	13310000	0.174194	-1.3758
Chr10_13300001_13320000	Chr10	13300001	13320000	0.192339	-1.47167
Chr10_13310001_13330000	Chr10	13310001	13330000	0.195789	-1.01199
Chr10_13320001_13340000	Chr10	13320001	13340000	0.156707	-0.584497
Chr10_13330001_13350000	Chr10	13330001	13350000	0.130595	-0.467713
Chr10_13340001_13360000	Chr10	13340001	13360000	0.122045	-0.316294
Chr10_13350001_13370000	Chr10	13350001	13370000	0.129555	-0.181022
Chr10_13360001_13380000	Chr10	13360001	13380000	0.132106	-0.116051
Chr10_13370001_13390000	Chr10	13370001	13390000	0.125572	0.0561329
Chr10_13380001_13400000	Chr10	13380001	13400000	0.112874	0.0672306
Chr10_13390001_13410000	Chr10	13390001	13410000	0.126806	-0.236748
Chr10_13400001_13420000	Chr10	13400001	13420000	0.196239	-0.889887
Chr10_13410001_13430000	Chr10	13410001	13430000	0.227064	-1.4882
Chr10_13420001_13440000	Chr10	13420001	13440000	0.198954	-1.26168
Chr10_13430001_13450000	Chr10	13430001	13450000	0.16277	-1.11089
Chr10_13440001_13460000	Chr10	13440001	13460000	0.173877	-1.24923
Chr10_13450001_13470000	Chr10	13450001	13470000	0.190673	-1.27945
Chr10_13460001_13480000	Chr10	13460001	13480000	0.164688	-1.01832
Chr10_13470001_13490000	Chr10	13470001	13490000	0.227471	-1.60474
Chr10_13480001_13500000	Chr10	13480001	13500000	0.229078	-1.85949
Chr10_13490001_13510000	Chr10	13490001	13510000	0.211314	-1.60751
Chr10_13500001_13520000	Chr10	13500001	13520000	0.199921	-1.30823
Chr10_13510001_13530000	Chr10	13510001	13530000	0.214444	-1.31146
Chr10_13520001_13540000	Chr10	13520001	13540000	0.248364	-1.24626
Chr10_13530001_13550000	Chr10	13530001	13550000	0.266757	-1.15859
Chr10_13540001_13560000	Chr10	13540001	13560000	0.262868	-1.21721
Chr10_13550001_13570000	Chr10	13550001	13570000	0.221672	-1.09692
Chr10_13560001_13580000	Chr10	13560001	13580000	0.181982	-0.94679
Chr10_13570001_13590000	Chr10	13570001	13590000	0.166657	-0.888703
Chr10_13580001_13600000	Chr10	13580001	13600000	0.154806	-0.872249
Chr10_13590001_13610000	Chr10	13590001	13610000	0.208554	-1.32734
Chr10_13600001_13620000	Chr10	13600001	13620000	0.213812	-1.50153
Chr10_13610001_13630000	Chr10	13610001	13630000	0.201545	-1.63493
Chr10_13620001_13640000	Chr10	13620001	13640000	0.191513	-1.51696
Chr10_13630001_13650000	Chr10	13630001	13650000	0.175108	-0.986143
Chr10_13640001_13660000	Chr10	13640001	13660000	0.251501	-1.06574
Chr10_13650001_13670000	Chr10	13650001	13670000	0.268183	-1.40234
Chr10_13660001_13680000	Chr10	13660001	13680000	0.238178	-1.83908
Chr10_13670001_13690000	Chr10	13670001	13690000	0.239622	-1.77109
Chr10_13680001_13700000	Chr10	13680001	13700000	0.266422	-1.62135
Chr10_13690001_13710000	Chr10	13690001	13710000	0.315437	-1.74879
Chr10_13700001_13720000	Chr10	13700001	13720000	0.3085	-1.62835
Chr10_13710001_13730000	Chr10	13710001	13730000	0.267874	-1.20106
Chr10_13720001_13740000	Chr10	13720001	13740000	0.251483	-0.988804
Chr10_13730001_13750000	Chr10	13730001	13750000	0.169086	-0.704666
Chr10_13740001_13760000	Chr10	13740001	13760000	0.0948537	-0.349035
Chr10_13750001_13770000	Chr10	13750001	13770000	0.159445	-0.559772
Chr10_13760001_13780000	Chr10	13760001	13780000	0.181842	-0.842413
Chr10_13770001_13790000	Chr10	13770001	13790000	0.161103	-1.11231
Chr10_13780001_13800000	Chr10	13780001	13800000	0.215406	-1.41822
Chr10_13790001_13810000	Chr10	13790001	13810000	0.298503	-1.6375
Chr10_13800001_13820000	Chr10	13800001	13820000	0.295185	-1.332
Chr10_13810001_13830000	Chr10	13810001	13830000	0.276705	-1.20641
Chr10_13820001_13840000	Chr10	13820001	13840000	0.343798	-1.52311
Chr10_13830001_13850000	Chr10	13830001	13850000	0.295964	-0.570004
Chr10_13840001_13860000	Chr10	13840001	13860000	0.210148	-0.166956
Chr10_13850001_13870000	Chr10	13850001	13870000	0.250859	-0.992928
Chr10_13860001_13880000	Chr10	13860001	13880000	0.317579	-1.30601
Chr10_13870001_13890000	Chr10	13870001	13890000	0.325712	-1.3713
Chr10_13880001_13900000	Chr10	13880001	13900000	0.31687	-1.29747
Chr10_13890001_13910000	Chr10	13890001	13910000	0.267192	-0.640089
Chr10_13900001_13920000	Chr10	13900001	13920000	0.169755	-0.155912
Chr10_13910001_13930000	Chr10	13910001	13930000	0.139018	0.0481241
Chr10_13920001_13940000	Chr10	13920001	13940000	0.193827	-0.297742
Chr10_13930001_13950000	Chr10	13930001	13950000	0.189073	-0.536367
Chr10_13940001_13960000	Chr10	13940001	13960000	0.151485	-0.276655
Chr10_13950001_13970000	Chr10	13950001	13970000	0.232687	-0.523176
Chr10_13960001_13980000	Chr10	13960001	13980000	0.296484	-1.06564
Chr10_13970001_13990000	Chr10	13970001	13990000	0.2618	-1.43117
Chr10_13980001_14000000	Chr10	13980001	14000000	0.189644	-0.978405
Chr10_13990001_14010000	Chr10	13990001	14010000	0.193709	-0.468106
Chr10_14000001_14020000	Chr10	14000001	14020000	0.234496	-1.05336
Chr10_14010001_14030000	Chr10	14010001	14030000	0.473299	-1.50164
Chr10_14020001_14040000	Chr10	14020001	14040000	0.535438	-1.27813
Chr10_14030001_14050000	Chr10	14030001	14050000	0.342251	-0.228712
Chr10_14040001_14060000	Chr10	14040001	14060000	0.181296	0.119582
Chr10_14050001_14070000	Chr10	14050001	14070000	0.171598	-0.655641
Chr10_14060001_14080000	Chr10	14060001	14080000	0.299572	-0.889772
Chr10_14070001_14090000	Chr10	14070001	14090000	0.321044	-0.90712
Chr10_14080001_14100000	Chr10	14080001	14100000	0.247738	-1.02053
Chr10_14090001_14110000	Chr10	14090001	14110000	0.274572	-1.15204
Chr10_14100001_14120000	Chr10	14100001	14120000	0.318784	-1.47095
Chr10_14110001_14130000	Chr10	14110001	14130000	0.446013	-1.43203
Chr10_14120001_14140000	Chr10	14120001	14140000	0.432088	-1.48845
Chr10_14130001_14150000	Chr10	14130001	14150000	0.345486	-1.55287
Chr10_14140001_14160000	Chr10	14140001	14160000	0.280013	-1.08656
Chr10_14150001_14170000	Chr10	14150001	14170000	0.179598	-0.97882
Chr10_14160001_14180000	Chr10	14160001	14180000	0.174309	-0.847164
Chr10_14170001_14190000	Chr10	14170001	14190000	0.264914	-0.762057
Chr10_14180001_14200000	Chr10	14180001	14200000	0.292644	-1.05921
Chr10_14190001_14210000	Chr10	14190001	14210000	0.310689	-1.57872
Chr10_14200001_14220000	Chr10	14200001	14220000	0.355701	-1.8007
Chr10_14210001_14230000	Chr10	14210001	14230000	0.29215	-1.30581
Chr10_14220001_14240000	Chr10	14220001	14240000	0.199014	-0.775543
Chr10_14230001_14250000	Chr10	14230001	14250000	0.181472	-0.836532
Chr10_14240001_14260000	Chr10	14240001	14260000	0.169665	-0.670552
Chr10_14250001_14270000	Chr10	14250001	14270000	0.22415	-0.382567
Chr10_14260001_14280000	Chr10	14260001	14280000	0.221514	-0.377263
Chr10_14270001_14290000	Chr10	14270001	14290000	0.238783	-0.712013
Chr10_14280001_14300000	Chr10	14280001	14300000	0.240017	-1.01252
Chr10_14290001_14310000	Chr10	14290001	14310000	0.193292	-1.13957
Chr10_14300001_14320000	Chr10	14300001	14320000	0.363129	-1.02787
Chr10_14310001_14330000	Chr10	14310001	14330000	0.397471	-1.19133
Chr10_14320001_14340000	Chr10	14320001	14340000	0.254591	-0.865481
Chr10_14330001_14350000	Chr10	14330001	14350000	0.139519	-0.492608
Chr10_14340001_14360000	Chr10	14340001	14360000	0.131905	-0.535198
Chr10_14350001_14370000	Chr10	14350001	14370000	0.181654	-1.07455
Chr10_14360001_14380000	Chr10	14360001	14380000	0.191987	-1.46957
Chr10_14370001_14390000	Chr10	14370001	14390000	0.11825	-0.524289
Chr10_14380001_14400000	Chr10	14380001	14400000	0.0992715	-0.325688
Chr10_14390001_14410000	Chr10	14390001	14410000	0.195964	-0.516298
Chr10_14400001_14420000	Chr10	14400001	14420000	0.214896	-0.704498
Chr10_14410001_14430000	Chr10	14410001	14430000	0.209842	-0.629017
Chr10_14420001_14440000	Chr10	14420001	14440000	0.200717	-0.483793
Chr10_14430001_14450000	Chr10	14430001	14450000	0.182004	-0.784562
Chr10_14440001_14460000	Chr10	14440001	14460000	0.194164	-1.04266
Chr10_14450001_14470000	Chr10	14450001	14470000	0.199674	-1.35478
Chr10_14460001_14480000	Chr10	14460001	14480000	0.211431	-1.27547
Chr10_14470001_14490000	Chr10	14470001	14490000	0.203109	-1.38068
Chr10_14480001_14500000	Chr10	14480001	14500000	0.187149	-1.21634
Chr10_14490001_14510000	Chr10	14490001	14510000	0.159226	-0.865179
Chr10_14500001_14520000	Chr10	14500001	14520000	0.142893	-1.33901
Chr10_14510001_14530000	Chr10	14510001	14530000	0.160156	-1.54231
Chr10_14520001_14540000	Chr10	14520001	14540000	0.159756	-1.21982
Chr10_14530001_14550000	Chr10	14530001	14550000	0.156556	-0.952061
Chr10_14540001_14560000	Chr10	14540001	14560000	0.198219	-0.872557
Chr10_14550001_14570000	Chr10	14550001	14570000	0.18871	-0.71746
Chr10_14560001_14580000	Chr10	14560001	14580000	0.166911	-0.761009
Chr10_14570001_14590000	Chr10	14570001	14590000	0.187664	-0.74481
Chr10_14580001_14600000	Chr10	14580001	14600000	0.180741	-0.0587276
Chr10_14590001_14610000	Chr10	14590001	14610000	0.178837	0.0927706
Chr10_14600001_14620000	Chr10	14600001	14620000	0.225558	-0.299354
Chr10_14610001_14630000	Chr10	14610001	14630000	0.203097	-0.496191
Chr10_14620001_14640000	Chr10	14620001	14640000	0.245021	-0.676029
Chr10_14630001_14650000	Chr10	14630001	14650000	0.285167	-0.987776
Chr10_14640001_14660000	Chr10	14640001	14660000	0.207521	-0.458429
Chr10_14650001_14670000	Chr10	14650001	14670000	0.181417	-0.521899
Chr10_14660001_14680000	Chr10	14660001	14680000	0.185894	-1.07113
Chr10_14670001_14690000	Chr10	14670001	14690000	0.238972	-0.975154
Chr10_14680001_14700000	Chr10	14680001	14700000	0.288768	-0.854119
Chr10_14690001_14710000	Chr10	14690001	14710000	0.310745	-1.13629
Chr10_14700001_14720000	Chr10	14700001	14720000	0.328443	-1.11905
Chr10_14710001_14730000	Chr10	14710001	14730000	0.291693	-0.775773
Chr10_14720001_14740000	Chr10	14720001	14740000	0.235044	-0.740686
Chr10_14730001_14750000	Chr10	14730001	14750000	0.245344	-1.32517
Chr10_14740001_14760000	Chr10	14740001	14760000	0.252765	-0.800077
Chr10_14750001_14770000	Chr10	14750001	14770000	0.225696	-0.495
Chr10_14760001_14780000	Chr10	14760001	14780000	0.18125	-0.648506
Chr10_14770001_14790000	Chr10	14770001	14790000	0.185591	-0.715505
Chr10_14780001_14800000	Chr10	14780001	14800000	0.178489	-0.773467
Chr10_14790001_14810000	Chr10	14790001	14810000	0.193358	-0.860818
Chr10_14800001_14820000	Chr10	14800001	14820000	0.269831	-1.05466
Chr10_14810001_14830000	Chr10	14810001	14830000	0.248128	-1.48682
Chr10_14820001_14840000	Chr10	14820001	14840000	0.262801	-1.47232
Chr10_14830001_14850000	Chr10	14830001	14850000	0.301824	-1.40895
Chr10_14840001_14860000	Chr10	14840001	14860000	0.206661	-0.77171
Chr10_14850001_14870000	Chr10	14850001	14870000	0.177923	-0.511435
Chr10_14860001_14880000	Chr10	14860001	14880000	0.192798	-0.638961
Chr10_14870001_14890000	Chr10	14870001	14890000	0.179592	-0.509659
Chr10_14880001_14900000	Chr10	14880001	14900000	0.192697	-0.81915
Chr10_14890001_14910000	Chr10	14890001	14910000	0.203787	-1.05591
Chr10_14900001_14920000	Chr10	14900001	14920000	0.271009	-1.30193
Chr10_14910001_14930000	Chr10	14910001	14930000	0.303515	-1.51906
Chr10_14920001_14940000	Chr10	14920001	14940000	0.239874	-1.45146
Chr10_14930001_14950000	Chr10	14930001	14950000	0.282146	-1.32483
Chr10_14940001_14960000	Chr10	14940001	14960000	0.29447	-1.13153
Chr10_14950001_14970000	Chr10	14950001	14970000	0.260706	-0.961815
Chr10_14960001_14980000	Chr10	14960001	14980000	0.24608	-1.04894
Chr10_14970001_14990000	Chr10	14970001	14990000	0.26606	-1.4625
Chr10_14980001_15000000	Chr10	14980001	15000000	0.306126	-1.53023
Chr10_14990001_15010000	Chr10	14990001	15010000	0.304313	-1.517
Chr10_15000001_15020000	Chr10	15000001	15020000	0.282275	-1.42349
Chr10_15010001_15030000	Chr10	15010001	15030000	0.331739	-1.52569
Chr10_15020001_15040000	Chr10	15020001	15040000	0.368036	-1.52579
Chr10_15030001_15050000	Chr10	15030001	15050000	0.277332	-0.763551
Chr10_15040001_15060000	Chr10	15040001	15060000	0.176066	-0.429503
Chr10_15050001_15070000	Chr10	15050001	15070000	0.178589	-0.39679
Chr10_15060001_15080000	Chr10	15060001	15080000	0.192842	-0.328659
Chr10_15070001_15090000	Chr10	15070001	15090000	0.291543	-0.665616
Chr10_15080001_15100000	Chr10	15080001	15100000	0.306913	-0.955395
Chr10_15090001_15110000	Chr10	15090001	15110000	0.214812	-0.414409
Chr10_15100001_15120000	Chr10	15100001	15120000	0.156361	-0.222853
Chr10_15110001_15130000	Chr10	15110001	15130000	0.241783	-0.971667
Chr10_15120001_15140000	Chr10	15120001	15140000	0.283787	-1.62372
Chr10_15130001_15150000	Chr10	15130001	15150000	0.176721	-0.975573
Chr10_15140001_15160000	Chr10	15140001	15160000	0.192032	-0.575789
Chr10_15150001_15170000	Chr10	15150001	15170000	0.23421	-0.7027
Chr10_15160001_15180000	Chr10	15160001	15180000	0.226473	-0.539925
Chr10_15170001_15190000	Chr10	15170001	15190000	0.337984	-0.461436
Chr10_15180001_15200000	Chr10	15180001	15200000	0.370095	-0.444091
Chr10_15190001_15210000	Chr10	15190001	15210000	0.241385	-0.289618
Chr10_15200001_15220000	Chr10	15200001	15220000	0.144631	-0.14928
Chr10_15210001_15230000	Chr10	15210001	15230000	0.23319	-0.382347
Chr10_15220001_15240000	Chr10	15220001	15240000	0.28608	-0.257535
Chr10_15230001_15250000	Chr10	15230001	15250000	0.287657	-0.0556583
Chr10_15240001_15260000	Chr10	15240001	15260000	0.239631	-0.290652
Chr10_15250001_15270000	Chr10	15250001	15270000	0.178463	0.35132
Chr10_15260001_15280000	Chr10	15260001	15280000	0.25959	0.411014
Chr10_15270001_15290000	Chr10	15270001	15290000	0.272473	0.039787
Chr10_15280001_15300000	Chr10	15280001	15300000	0.216299	-0.170027
Chr10_15290001_15310000	Chr10	15290001	15310000	0.190465	-0.40296
Chr10_15300001_15320000	Chr10	15300001	15320000	0.213708	-0.653682
Chr10_15310001_15330000	Chr10	15310001	15330000	0.19353	-0.410687
Chr10_15320001_15340000	Chr10	15320001	15340000	0.23873	-0.355309
Chr10_15330001_15350000	Chr10	15330001	15350000	0.344002	-0.627826
Chr10_15340001_15360000	Chr10	15340001	15360000	0.290019	-0.629033
Chr10_15350001_15370000	Chr10	15350001	15370000	0.222877	-0.546589
Chr10_15360001_15380000	Chr10	15360001	15380000	0.239062	-0.696221
Chr10_15370001_15390000	Chr10	15370001	15390000	0.285048	-0.692483
Chr10_15380001_15400000	Chr10	15380001	15400000	0.220779	-0.547557
Chr10_15390001_15410000	Chr10	15390001	15410000	0.136311	-0.539465
Chr10_15400001_15420000	Chr10	15400001	15420000	0.215012	-0.965736
Chr10_15410001_15430000	Chr10	15410001	15430000	0.209139	-0.981929
Chr10_15420001_15440000	Chr10	15420001	15440000	0.203848	-0.718169
Chr10_15430001_15450000	Chr10	15430001	15450000	0.205189	-0.508982
Chr10_15440001_15460000	Chr10	15440001	15460000	0.166917	-0.715989
Chr10_15450001_15470000	Chr10	15450001	15470000	0.15202	-0.685198
Chr10_15460001_15480000	Chr10	15460001	15480000	0.130748	-0.394098
Chr10_15470001_15490000	Chr10	15470001	15490000	0.125636	-0.324344
Chr10_15480001_15500000	Chr10	15480001	15500000	0.16122	-0.225503
Chr10_15490001_15510000	Chr10	15490001	15510000	0.217487	-0.572167
Chr10_15500001_15520000	Chr10	15500001	15520000	0.259966	-1.21428
Chr10_15510001_15530000	Chr10	15510001	15530000	0.266409	-0.664464
Chr10_15520001_15540000	Chr10	15520001	15540000	0.258306	-0.188329
Chr10_15530001_15550000	Chr10	15530001	15550000	0.26198	-0.481545
Chr10_15540001_15560000	Chr10	15540001	15560000	0.235564	-0.552346
Chr10_15550001_15570000	Chr10	15550001	15570000	0.217474	-0.223418
Chr10_15560001_15580000	Chr10	15560001	15580000	0.206262	-0.148325
Chr10_15570001_15590000	Chr10	15570001	15590000	0.186558	0.252036
Chr10_15580001_15600000	Chr10	15580001	15600000	0.1589	0.350364
Chr10_15590001_15610000	Chr10	15590001	15610000	0.190486	0.130588
Chr10_15600001_15620000	Chr10	15600001	15620000	0.184282	-0.199388
Chr10_15610001_15630000	Chr10	15610001	15630000	0.127338	-0.460555
Chr10_15620001_15640000	Chr10	15620001	15640000	0.157008	-0.4828
Chr10_15630001_15650000	Chr10	15630001	15650000	0.219055	-0.463511
Chr10_15640001_15660000	Chr10	15640001	15660000	0.173785	-0.0390189
Chr10_15650001_15670000	Chr10	15650001	15670000	0.157522	-0.153368
Chr10_15660001_15680000	Chr10	15660001	15680000	0.132889	-0.265013
Chr10_15670001_15690000	Chr10	15670001	15690000	0.13639	-0.394888
Chr10_15680001_15700000	Chr10	15680001	15700000	0.215188	-1.29505
Chr10_15690001_15710000	Chr10	15690001	15710000	0.22901	-1.90123
Chr10_15700001_15720000	Chr10	15700001	15720000	0.187732	-1.58857
Chr10_15710001_15730000	Chr10	15710001	15730000	0.153583	-0.390994
Chr10_15720001_15740000	Chr10	15720001	15740000	0.183818	-0.302962
Chr10_15730001_15750000	Chr10	15730001	15750000	0.153315	-0.257312
Chr10_15740001_15760000	Chr10	15740001	15760000	0.166281	-0.224098
Chr10_15750001_15770000	Chr10	15750001	15770000	0.282206	-0.584849
Chr10_15760001_15780000	Chr10	15760001	15780000	0.227598	-0.529338
Chr10_15770001_15790000	Chr10	15770001	15790000	0.215769	-0.579233
Chr10_15780001_15800000	Chr10	15780001	15800000	0.236907	-0.827826
Chr10_15790001_15810000	Chr10	15790001	15810000	0.197801	-0.590458
Chr10_15800001_15820000	Chr10	15800001	15820000	0.168655	-0.271736
Chr10_15810001_15830000	Chr10	15810001	15830000	0.123653	-0.235376
Chr10_15820001_15840000	Chr10	15820001	15840000	0.0783138	-0.0619256
Chr10_15830001_15850000	Chr10	15830001	15850000	0.14517	-0.120418
Chr10_15840001_15860000	Chr10	15840001	15860000	0.192517	-0.246165
Chr10_15850001_15870000	Chr10	15850001	15870000	0.167145	-0.0515001
Chr10_15860001_15880000	Chr10	15860001	15880000	0.231762	0.0989726
Chr10_15870001_15890000	Chr10	15870001	15890000	0.282976	-0.537512
Chr10_15880001_15900000	Chr10	15880001	15900000	0.271664	-0.843707
Chr10_15890001_15910000	Chr10	15890001	15910000	0.276353	-0.635131
Chr10_15900001_15920000	Chr10	15900001	15920000	0.278209	-1.20027
Chr10_15910001_15930000	Chr10	15910001	15930000	0.29728	-1.77952
Chr10_15920001_15940000	Chr10	15920001	15940000	0.254412	-1.33485
Chr10_15930001_15950000	Chr10	15930001	15950000	0.195114	-0.558309
Chr10_15940001_15960000	Chr10	15940001	15960000	0.172571	-0.192363
Chr10_15950001_15970000	Chr10	15950001	15970000	0.163065	-0.39004
Chr10_15960001_15980000	Chr10	15960001	15980000	0.187368	-0.931521
Chr10_15970001_15990000	Chr10	15970001	15990000	0.215549	-1.49987
Chr10_15980001_16000000	Chr10	15980001	16000000	0.241612	-1.13194
Chr10_15990001_16010000	Chr10	15990001	16010000	0.266143	-1.21306
Chr10_16000001_16020000	Chr10	16000001	16020000	0.233378	-1.72357
Chr10_16010001_16030000	Chr10	16010001	16030000	0.221811	-1.67328
Chr10_16020001_16040000	Chr10	16020001	16040000	0.273591	-1.85489
Chr10_16030001_16050000	Chr10	16030001	16050000	0.263099	-1.53313
Chr10_16040001_16060000	Chr10	16040001	16060000	0.242236	-1.3129
Chr10_16050001_16070000	Chr10	16050001	16070000	0.277648	-1.61371
Chr10_16060001_16080000	Chr10	16060001	16080000	0.288864	-1.78554
Chr10_16070001_16090000	Chr10	16070001	16090000	0.307811	-1.62797
Chr10_16080001_16100000	Chr10	16080001	16100000	0.334214	-1.2982
Chr10_16090001_16110000	Chr10	16090001	16110000	0.329216	-1.35369
Chr10_16100001_16120000	Chr10	16100001	16120000	0.274093	-1.15245
Chr10_16110001_16130000	Chr10	16110001	16130000	0.193936	-0.61264
Chr10_16120001_16140000	Chr10	16120001	16140000	0.196227	-0.54011
Chr10_16130001_16150000	Chr10	16130001	16150000	0.189666	-0.278354
Chr10_16140001_16160000	Chr10	16140001	16160000	0.143625	-0.0637541
Chr10_16150001_16170000	Chr10	16150001	16170000	0.114885	-0.266571
Chr10_16160001_16180000	Chr10	16160001	16180000	0.221827	-0.803001
Chr10_16170001_16190000	Chr10	16170001	16190000	0.336349	-0.947554
Chr10_16180001_16200000	Chr10	16180001	16200000	0.332184	-0.699153
Chr10_16190001_16210000	Chr10	16190001	16210000	0.263084	-0.752692
Chr10_16200001_16220000	Chr10	16200001	16220000	0.196893	-0.920012
Chr10_16210001_16230000	Chr10	16210001	16230000	0.220765	-1.00114
Chr10_16220001_16240000	Chr10	16220001	16240000	0.21311	-0.386806
Chr10_16230001_16250000	Chr10	16230001	16250000	0.200926	-0.140292
Chr10_16240001_16260000	Chr10	16240001	16260000	0.269182	-0.816151
Chr10_16250001_16270000	Chr10	16250001	16270000	0.270405	-0.984974
Chr10_16260001_16280000	Chr10	16260001	16280000	0.246938	-0.505958
Chr10_16270001_16290000	Chr10	16270001	16290000	0.239338	-0.403581
Chr10_16280001_16300000	Chr10	16280001	16300000	0.249081	-0.18689
Chr10_16290001_16310000	Chr10	16290001	16310000	0.253092	0.0270205
Chr10_16300001_16320000	Chr10	16300001	16320000	0.182703	0.222839
Chr10_16310001_16330000	Chr10	16310001	16330000	0.197218	0.0932502
Chr10_16320001_16340000	Chr10	16320001	16340000	0.188786	-0.170847
Chr10_16330001_16350000	Chr10	16330001	16350000	0.144714	-0.400842
Chr10_16340001_16360000	Chr10	16340001	16360000	0.155753	-0.770986
Chr10_16350001_16370000	Chr10	16350001	16370000	0.20464	-1.50334
Chr10_16360001_16380000	Chr10	16360001	16380000	0.278087	-0.847512
Chr10_16370001_16390000	Chr10	16370001	16390000	0.348615	-0.841465
Chr10_16380001_16400000	Chr10	16380001	16400000	0.304496	-1.05245
Chr10_16390001_16410000	Chr10	16390001	16410000	0.240597	-0.591636
Chr10_16400001_16420000	Chr10	16400001	16420000	0.240972	-0.265613
Chr10_16410001_16430000	Chr10	16410001	16430000	0.221762	-0.129253
Chr10_16420001_16440000	Chr10	16420001	16440000	0.206418	0.0574614
Chr10_16430001_16450000	Chr10	16430001	16450000	0.190761	-0.321111
Chr10_16440001_16460000	Chr10	16440001	16460000	0.185126	-0.503448
Chr10_16450001_16470000	Chr10	16450001	16470000	0.173117	0.056298
Chr10_16460001_16480000	Chr10	16460001	16480000	0.200405	-0.148505
Chr10_16470001_16490000	Chr10	16470001	16490000	0.188518	-0.5336
Chr10_16480001_16500000	Chr10	16480001	16500000	0.218304	-0.395178
Chr10_16490001_16510000	Chr10	16490001	16510000	0.265359	-0.520807
Chr10_16500001_16520000	Chr10	16500001	16520000	0.258677	-0.72738
Chr10_16510001_16530000	Chr10	16510001	16530000	0.190656	-0.845507
Chr10_16520001_16540000	Chr10	16520001	16540000	0.215273	-0.939466
Chr10_16530001_16550000	Chr10	16530001	16550000	0.274574	-0.734532
Chr10_16540001_16560000	Chr10	16540001	16560000	0.21812	-0.596133
Chr10_16550001_16570000	Chr10	16550001	16570000	0.17109	-0.666047
Chr10_16560001_16580000	Chr10	16560001	16580000	0.258452	-0.913291
Chr10_16570001_16590000	Chr10	16570001	16590000	0.276496	-0.673065
Chr10_16580001_16600000	Chr10	16580001	16600000	0.215375	-0.408671
Chr10_16590001_16610000	Chr10	16590001	16610000	0.203011	-0.548064
Chr10_16600001_16620000	Chr10	16600001	16620000	0.192832	-0.389444
Chr10_16610001_16630000	Chr10	16610001	16630000	0.171057	-0.203291
Chr10_16620001_16640000	Chr10	16620001	16640000	0.227008	-0.566225
Chr10_16630001_16650000	Chr10	16630001	16650000	0.239282	-0.71164
Chr10_16640001_16660000	Chr10	16640001	16660000	0.256664	-1.16165
Chr10_16650001_16670000	Chr10	16650001	16670000	0.281903	-0.434456
Chr10_16660001_16680000	Chr10	16660001	16680000	0.279239	-0.015006
Chr10_16670001_16690000	Chr10	16670001	16690000	0.31941	-0.43799
Chr10_16680001_16700000	Chr10	16680001	16700000	0.322765	-0.904196
Chr10_16690001_16710000	Chr10	16690001	16710000	0.29411	-1.00699
Chr10_16700001_16720000	Chr10	16700001	16720000	0.254738	-0.748871
Chr10_16710001_16730000	Chr10	16710001	16730000	0.279086	-0.326568
Chr10_16720001_16740000	Chr10	16720001	16740000	0.289278	0.105203
Chr10_16730001_16750000	Chr10	16730001	16750000	0.280701	-0.271268
Chr10_16740001_16760000	Chr10	16740001	16760000	0.306685	-0.622135
Chr10_16750001_16770000	Chr10	16750001	16770000	0.218321	-0.20288
Chr10_16760001_16780000	Chr10	16760001	16780000	0.146005	-0.0744046
Chr10_16770001_16790000	Chr10	16770001	16790000	0.142529	-0.193804
Chr10_16780001_16800000	Chr10	16780001	16800000	0.155786	-0.481678
Chr10_16790001_16810000	Chr10	16790001	16810000	0.173499	-0.544454
Chr10_16800001_16820000	Chr10	16800001	16820000	0.223464	-0.29244
Chr10_16810001_16830000	Chr10	16810001	16830000	0.322802	-0.361135
Chr10_16820001_16840000	Chr10	16820001	16840000	0.333393	-0.494329
Chr10_16830001_16850000	Chr10	16830001	16850000	0.31273	-0.661611
Chr10_16840001_16860000	Chr10	16840001	16860000	0.310322	-0.629074
Chr10_16850001_16870000	Chr10	16850001	16870000	0.307161	-0.743291
Chr10_16860001_16880000	Chr10	16860001	16880000	0.259204	-1.11254
Chr10_16870001_16890000	Chr10	16870001	16890000	0.248441	-0.931942
Chr10_16880001_16900000	Chr10	16880001	16900000	0.234124	-0.627979
Chr10_16890001_16910000	Chr10	16890001	16910000	0.208356	-0.0611246
Chr10_16900001_16920000	Chr10	16900001	16920000	0.195439	0.212877
Chr10_16910001_16930000	Chr10	16910001	16930000	0.186631	-0.0442885
Chr10_16920001_16940000	Chr10	16920001	16940000	0.188	-0.317021
Chr10_16930001_16950000	Chr10	16930001	16950000	0.144659	-0.133663
Chr10_16940001_16960000	Chr10	16940001	16960000	0.132549	0.0271611
Chr10_16950001_16970000	Chr10	16950001	16970000	0.127724	0.0997792
Chr10_16960001_16980000	Chr10	16960001	16980000	0.12518	0.165938
Chr10_16970001_16990000	Chr10	16970001	16990000	0.0902951	0.761343
Chr10_16980001_17000000	Chr10	16980001	17000000	0.131081	0.665306
Chr10_16990001_17010000	Chr10	16990001	17010000	0.216157	-0.293525
Chr10_17000001_17020000	Chr10	17000001	17020000	0.167277	-0.615657
Chr10_17010001_17030000	Chr10	17010001	17030000	0.183188	-0.361205
Chr10_17020001_17040000	Chr10	17020001	17040000	0.234788	-0.0112403
Chr10_17030001_17050000	Chr10	17030001	17050000	0.303599	0.375835
Chr10_17040001_17060000	Chr10	17040001	17060000	0.28588	0.539791
Chr10_17050001_17070000	Chr10	17050001	17070000	0.223557	0.450444
Chr10_17060001_17080000	Chr10	17060001	17080000	0.201666	-0.053165
Chr10_17070001_17090000	Chr10	17070001	17090000	0.275511	-0.636421
Chr10_17080001_17100000	Chr10	17080001	17100000	0.312042	-0.791501
Chr10_17090001_17110000	Chr10	17090001	17110000	0.259314	-0.459054
Chr10_17100001_17120000	Chr10	17100001	17120000	0.208924	-0.141713
Chr10_17110001_17130000	Chr10	17110001	17130000	0.221327	0.096588
Chr10_17120001_17140000	Chr10	17120001	17140000	0.273891	0.0887131
Chr10_17130001_17150000	Chr10	17130001	17150000	0.291036	-0.213632
Chr10_17140001_17160000	Chr10	17140001	17160000	0.240111	-0.3794
Chr10_17150001_17170000	Chr10	17150001	17170000	0.249656	-0.19543
Chr10_17160001_17180000	Chr10	17160001	17180000	0.36229	-0.823806
Chr10_17170001_17190000	Chr10	17170001	17190000	0.434306	-1.23176
Chr10_17180001_17200000	Chr10	17180001	17200000	0.29922	-0.699817
Chr10_17190001_17210000	Chr10	17190001	17210000	0.235145	-0.784273
Chr10_17200001_17220000	Chr10	17200001	17220000	0.269931	-1.30531
Chr10_17210001_17230000	Chr10	17210001	17230000	0.243056	-1.41893
Chr10_17220001_17240000	Chr10	17220001	17240000	0.325914	-1.48127
Chr10_17230001_17250000	Chr10	17230001	17250000	0.371014	-1.63643
Chr10_17240001_17260000	Chr10	17240001	17260000	0.312783	-1.82754
Chr10_17250001_17270000	Chr10	17250001	17270000	0.371958	-2.12483
Chr10_17260001_17280000	Chr10	17260001	17280000	0.374654	-2.24302
Chr10_17270001_17290000	Chr10	17270001	17290000	0.284476	-1.57331
Chr10_17280001_17300000	Chr10	17280001	17300000	0.266052	-0.774723
Chr10_17290001_17310000	Chr10	17290001	17310000	0.211539	-0.219991
Chr10_17300001_17320000	Chr10	17300001	17320000	0.207007	-0.206113
Chr10_17310001_17330000	Chr10	17310001	17330000	0.232688	-0.526676
Chr10_17320001_17340000	Chr10	17320001	17340000	0.252033	-1.06405
Chr10_17330001_17350000	Chr10	17330001	17350000	0.1872	-0.550531
Chr10_17340001_17360000	Chr10	17340001	17360000	0.190913	-0.0158914
Chr10_17350001_17370000	Chr10	17350001	17370000	0.25909	0.500826
Chr10_17360001_17380000	Chr10	17360001	17380000	0.325162	1.0492
Chr10_17370001_17390000	Chr10	17370001	17390000	0.358138	0.346662
Chr10_17380001_17400000	Chr10	17380001	17400000	0.296347	-0.591097
Chr10_17390001_17410000	Chr10	17390001	17410000	0.253566	0.171092
Chr10_17400001_17420000	Chr10	17400001	17420000	0.24266	-0.00910533
Chr10_17410001_17430000	Chr10	17410001	17430000	0.26068	-1.05349
Chr10_17420001_17440000	Chr10	17420001	17440000	0.290298	-0.818782
Chr10_17430001_17450000	Chr10	17430001	17450000	0.289379	-0.79734
Chr10_17440001_17460000	Chr10	17440001	17460000	0.276672	-1.47761
Chr10_17450001_17470000	Chr10	17450001	17470000	0.203619	-0.865805
Chr10_17460001_17480000	Chr10	17460001	17480000	0.237	-0.88265
Chr10_17470001_17490000	Chr10	17470001	17490000	0.292468	-1.64829
Chr10_17480001_17500000	Chr10	17480001	17500000	0.315258	-1.82998
Chr10_17490001_17510000	Chr10	17490001	17510000	0.324213	-2.045
Chr10_17500001_17520000	Chr10	17500001	17520000	0.283785	-1.29104
Chr10_17510001_17530000	Chr10	17510001	17530000	0.28011	-0.640352
Chr10_17520001_17540000	Chr10	17520001	17540000	0.260553	-1.05391
Chr10_17530001_17550000	Chr10	17530001	17550000	0.231874	-1.74713
Chr10_17540001_17560000	Chr10	17540001	17560000	0.259822	-1.13866
Chr10_17550001_17570000	Chr10	17550001	17570000	0.258318	-0.755485
Chr10_17560001_17580000	Chr10	17560001	17580000	0.192417	-0.735302
Chr10_17570001_17590000	Chr10	17570001	17590000	0.132542	-0.74441
Chr10_17580001_17600000	Chr10	17580001	17600000	0.106998	-0.457297
Chr10_17590001_17610000	Chr10	17590001	17610000	0.179301	-0.460409
Chr10_17600001_17620000	Chr10	17600001	17620000	0.21371	-0.493381
Chr10_17610001_17630000	Chr10	17610001	17630000	0.177609	-0.348573
Chr10_17620001_17640000	Chr10	17620001	17640000	0.197605	-0.443245
Chr10_17630001_17650000	Chr10	17630001	17650000	0.233082	-0.690052
Chr10_17640001_17660000	Chr10	17640001	17660000	0.234107	-0.805467
Chr10_17650001_17670000	Chr10	17650001	17670000	0.245669	-0.763268
Chr10_17660001_17680000	Chr10	17660001	17680000	0.233902	-0.689883
Chr10_17670001_17690000	Chr10	17670001	17690000	0.215698	-0.716976
Chr10_17680001_17700000	Chr10	17680001	17700000	0.211661	-0.752905
Chr10_17690001_17710000	Chr10	17690001	17710000	0.172719	-0.896219
Chr10_17700001_17720000	Chr10	17700001	17720000	0.134626	-1.29543
Chr10_17710001_17730000	Chr10	17710001	17730000	0.122598	-0.779362
Chr10_17720001_17740000	Chr10	17720001	17740000	0.119886	-0.155374
Chr10_17730001_17750000	Chr10	17730001	17750000	0.118495	-0.228022
Chr10_17740001_17760000	Chr10	17740001	17760000	0.0720433	-0.2222
Chr10_17750001_17770000	Chr10	17750001	17770000	0.0530408	-0.0819341
Chr10_17760001_17780000	Chr10	17760001	17780000	0.0615393	-0.372084
Chr10_17770001_17790000	Chr10	17770001	17790000	0.0801231	-0.232922
Chr10_17780001_17800000	Chr10	17780001	17800000	0.116582	0.194514
Chr10_17790001_17810000	Chr10	17790001	17810000	0.125671	0.385495
Chr10_17800001_17820000	Chr10	17800001	17820000	0.108263	0.474953
Chr10_17810001_17830000	Chr10	17810001	17830000	0.10103	0.275303
Chr10_17820001_17840000	Chr10	17820001	17840000	0.0864906	0.250121
Chr10_17830001_17850000	Chr10	17830001	17850000	0.0754195	0.438784
Chr10_17840001_17860000	Chr10	17840001	17860000	0.0841831	0.288779
Chr10_17850001_17870000	Chr10	17850001	17870000	0.104602	-0.152713
Chr10_17860001_17880000	Chr10	17860001	17880000	0.140474	0.0797854
Chr10_17870001_17890000	Chr10	17870001	17890000	0.13521	0.625288
Chr10_17880001_17900000	Chr10	17880001	17900000	0.152821	0.694208
Chr10_17890001_17910000	Chr10	17890001	17910000	0.184849	0.487245
Chr10_17900001_17920000	Chr10	17900001	17920000	0.166821	0.190071
Chr10_17910001_17930000	Chr10	17910001	17930000	0.206651	-0.040491
Chr10_17920001_17940000	Chr10	17920001	17940000	0.202499	-0.0649727
Chr10_17930001_17950000	Chr10	17930001	17950000	0.22169	-0.727826
Chr10_17940001_17960000	Chr10	17940001	17960000	0.239661	-0.839678
Chr10_17950001_17970000	Chr10	17950001	17970000	0.231159	-0.333037
Chr10_17960001_17980000	Chr10	17960001	17980000	0.267993	-0.363266
Chr10_17970001_17990000	Chr10	17970001	17990000	0.217358	-0.811938
Chr10_17980001_18000000	Chr10	17980001	18000000	0.158253	-0.801519
Chr10_17990001_18010000	Chr10	17990001	18010000	0.224776	-0.776631
Chr10_18000001_18020000	Chr10	18000001	18020000	0.483771	-1.22987
Chr10_18010001_18030000	Chr10	18010001	18030000	0.563757	-1.30629
Chr10_18020001_18040000	Chr10	18020001	18040000	0.302049	-0.215902
Chr10_18030001_18050000	Chr10	18030001	18050000	0.175582	-0.160883
Chr10_18040001_18060000	Chr10	18040001	18060000	0.180855	-0.640926
Chr10_18050001_18070000	Chr10	18050001	18070000	0.182631	-0.443402
Chr10_18060001_18080000	Chr10	18060001	18080000	0.158532	0.133486
Chr10_18070001_18090000	Chr10	18070001	18090000	0.356247	-0.172199
Chr10_18080001_18100000	Chr10	18080001	18100000	0.421681	-0.754756
Chr10_18090001_18110000	Chr10	18090001	18110000	0.285582	-0.542877
Chr10_18100001_18120000	Chr10	18100001	18120000	0.277125	-0.626899
Chr10_18110001_18130000	Chr10	18110001	18130000	0.310738	-1.36322
Chr10_18120001_18140000	Chr10	18120001	18140000	0.317912	-1.90286
Chr10_18130001_18150000	Chr10	18130001	18150000	0.280703	-1.39389
Chr10_18140001_18160000	Chr10	18140001	18160000	0.227137	-0.873544
Chr10_18150001_18170000	Chr10	18150001	18170000	0.166467	-0.341886
Chr10_18160001_18180000	Chr10	18160001	18180000	0.173399	-0.382166
Chr10_18170001_18190000	Chr10	18170001	18190000	0.219227	-0.346663
Chr10_18180001_18200000	Chr10	18180001	18200000	0.207358	-0.141916
Chr10_18190001_18210000	Chr10	18190001	18210000	0.192932	0.114516
Chr10_18200001_18220000	Chr10	18200001	18220000	0.260052	0.55488
Chr10_18210001_18230000	Chr10	18210001	18230000	0.291453	-0.0851957
Chr10_18220001_18240000	Chr10	18220001	18240000	0.264793	-0.472709
Chr10_18230001_18250000	Chr10	18230001	18250000	0.21769	-0.274757
Chr10_18240001_18260000	Chr10	18240001	18260000	0.258527	-0.836657
Chr10_18250001_18270000	Chr10	18250001	18270000	0.314524	-1.21317
Chr10_18260001_18280000	Chr10	18260001	18280000	0.260434	-0.763748
Chr10_18270001_18290000	Chr10	18270001	18290000	0.252375	-0.725893
Chr10_18280001_18300000	Chr10	18280001	18300000	0.281555	-0.817724
Chr10_18290001_18310000	Chr10	18290001	18310000	0.281387	-0.595761
Chr10_18300001_18320000	Chr10	18300001	18320000	0.254138	-0.516529
Chr10_18310001_18330000	Chr10	18310001	18330000	0.244035	-0.529411
Chr10_18320001_18340000	Chr10	18320001	18340000	0.208876	-0.791538
Chr10_18330001_18350000	Chr10	18330001	18350000	0.204551	-1.09529
Chr10_18340001_18360000	Chr10	18340001	18360000	0.296723	-1.38063
Chr10_18350001_18370000	Chr10	18350001	18370000	0.289879	-1.0483
Chr10_18360001_18380000	Chr10	18360001	18380000	0.250665	-0.409226
Chr10_18370001_18390000	Chr10	18370001	18390000	0.267161	-0.447076
Chr10_18380001_18400000	Chr10	18380001	18400000	0.285517	-0.573893
Chr10_18390001_18410000	Chr10	18390001	18410000	0.301991	-1.07172
Chr10_18400001_18420000	Chr10	18400001	18420000	0.235518	-1.38369
Chr10_18410001_18430000	Chr10	18410001	18430000	0.267136	-0.98289
Chr10_18420001_18440000	Chr10	18420001	18440000	0.292004	-0.513237
Chr10_18430001_18450000	Chr10	18430001	18450000	0.191315	-0.153025
Chr10_18440001_18460000	Chr10	18440001	18460000	0.152967	-0.0289185
Chr10_18450001_18470000	Chr10	18450001	18470000	0.243059	-0.936841
Chr10_18460001_18480000	Chr10	18460001	18480000	0.319158	-1.57072
Chr10_18470001_18490000	Chr10	18470001	18490000	0.298105	-1.57535
Chr10_18480001_18500000	Chr10	18480001	18500000	0.267213	-1.18961
Chr10_18490001_18510000	Chr10	18490001	18510000	0.241898	-0.504743
Chr10_18500001_18520000	Chr10	18500001	18520000	0.194306	0.141075
Chr10_18510001_18530000	Chr10	18510001	18530000	0.294336	-0.49319
Chr10_18520001_18540000	Chr10	18520001	18540000	0.283394	-0.228601
Chr10_18530001_18550000	Chr10	18530001	18550000	0.202342	0.345441
Chr10_18540001_18560000	Chr10	18540001	18560000	0.234136	-0.125549
Chr10_18550001_18570000	Chr10	18550001	18570000	0.21788	-0.289992
Chr10_18560001_18580000	Chr10	18560001	18580000	0.206378	-0.135717
Chr10_18570001_18590000	Chr10	18570001	18590000	0.262411	-0.485226
Chr10_18580001_18600000	Chr10	18580001	18600000	0.24532	-0.604618
Chr10_18590001_18610000	Chr10	18590001	18610000	0.276466	-1.09085
Chr10_18600001_18620000	Chr10	18600001	18620000	0.307861	-1.57385
Chr10_18610001_18630000	Chr10	18610001	18630000	0.302796	-1.14293
Chr10_18620001_18640000	Chr10	18620001	18640000	0.328732	-0.946729
Chr10_18630001_18650000	Chr10	18630001	18650000	0.257113	-0.916379
Chr10_18640001_18660000	Chr10	18640001	18660000	0.175493	-0.869049
Chr10_18650001_18670000	Chr10	18650001	18670000	0.2047	-1.20892
Chr10_18660001_18680000	Chr10	18660001	18680000	0.229039	-1.2343
Chr10_18670001_18690000	Chr10	18670001	18690000	0.232272	-1.03706
Chr10_18680001_18700000	Chr10	18680001	18700000	0.200942	-0.736757
Chr10_18690001_18710000	Chr10	18690001	18710000	0.169025	-0.327353
Chr10_18700001_18720000	Chr10	18700001	18720000	0.111978	0.264592
Chr10_18710001_18730000	Chr10	18710001	18730000	0.0895512	0.347586
Chr10_18720001_18740000	Chr10	18720001	18740000	0.1355	0.042584
Chr10_18730001_18750000	Chr10	18730001	18750000	0.229507	-0.485646
Chr10_18740001_18760000	Chr10	18740001	18760000	0.268301	-1.13332
Chr10_18750001_18770000	Chr10	18750001	18770000	0.245772	-0.896581
Chr10_18760001_18780000	Chr10	18760001	18780000	0.258387	-0.875649
Chr10_18770001_18790000	Chr10	18770001	18790000	0.240855	-1.12162
Chr10_18780001_18800000	Chr10	18780001	18800000	0.200022	-0.485251
Chr10_18790001_18810000	Chr10	18790001	18810000	0.149567	-0.157932
Chr10_18800001_18820000	Chr10	18800001	18820000	0.133602	-0.51544
Chr10_18810001_18830000	Chr10	18810001	18830000	0.179382	-0.626006
Chr10_18820001_18840000	Chr10	18820001	18840000	0.216595	-0.594054
Chr10_18830001_18850000	Chr10	18830001	18850000	0.171963	-0.441983
Chr10_18840001_18860000	Chr10	18840001	18860000	0.162369	-0.37627
Chr10_18850001_18870000	Chr10	18850001	18870000	0.151896	-0.344556
Chr10_18860001_18880000	Chr10	18860001	18880000	0.139482	-0.32038
Chr10_18870001_18890000	Chr10	18870001	18890000	0.199476	-0.136543
Chr10_18880001_18900000	Chr10	18880001	18900000	0.254474	-0.135751
Chr10_18890001_18910000	Chr10	18890001	18910000	0.238048	-0.615788
Chr10_18900001_18920000	Chr10	18900001	18920000	0.158043	-0.277049
Chr10_18910001_18930000	Chr10	18910001	18930000	0.12894	-0.272068
Chr10_18920001_18940000	Chr10	18920001	18940000	0.185904	-0.239842
Chr10_18930001_18950000	Chr10	18930001	18950000	0.215322	-0.00586714
Chr10_18940001_18960000	Chr10	18940001	18960000	0.338049	-0.454313
Chr10_18950001_18970000	Chr10	18950001	18970000	0.37752	-1.01683
Chr10_18960001_18980000	Chr10	18960001	18980000	0.250445	-1.02181
Chr10_18970001_18990000	Chr10	18970001	18990000	0.194815	-0.75305
Chr10_18980001_19000000	Chr10	18980001	19000000	0.152522	-0.450938
Chr10_18990001_19010000	Chr10	18990001	19010000	0.16144	-0.49414
Chr10_19000001_19020000	Chr10	19000001	19020000	0.161761	-0.265154
Chr10_19010001_19030000	Chr10	19010001	19030000	0.225785	-1.0111
Chr10_19020001_19040000	Chr10	19020001	19040000	0.217178	-1.52845
Chr10_19030001_19050000	Chr10	19030001	19050000	0.218473	-1.17664
Chr10_19040001_19060000	Chr10	19040001	19060000	0.196523	-0.208835
Chr10_19050001_19070000	Chr10	19050001	19070000	0.104232	0.145064
Chr10_19060001_19080000	Chr10	19060001	19080000	0.138538	-0.404188
Chr10_19070001_19090000	Chr10	19070001	19090000	0.185862	-0.333058
Chr10_19080001_19100000	Chr10	19080001	19100000	0.21243	-0.438475
Chr10_19090001_19110000	Chr10	19090001	19110000	0.249144	-0.427512
Chr10_19100001_19120000	Chr10	19100001	19120000	0.231378	-0.20986
Chr10_19110001_19130000	Chr10	19110001	19130000	0.226496	-0.377021
Chr10_19120001_19140000	Chr10	19120001	19140000	0.209381	-0.292219
Chr10_19130001_19150000	Chr10	19130001	19150000	0.273739	-0.212375
Chr10_19140001_19160000	Chr10	19140001	19160000	0.376042	-0.288309
Chr10_19150001_19170000	Chr10	19150001	19170000	0.313199	-0.688152
Chr10_19160001_19180000	Chr10	19160001	19180000	0.228873	-1.22253
Chr10_19170001_19190000	Chr10	19170001	19190000	0.219373	-0.948612
Chr10_19180001_19200000	Chr10	19180001	19200000	0.227364	-0.780223
Chr10_19190001_19210000	Chr10	19190001	19210000	0.211396	-0.913137
Chr10_19200001_19220000	Chr10	19200001	19220000	0.190881	-0.73942
Chr10_19210001_19230000	Chr10	19210001	19230000	0.19454	-0.657288
Chr10_19220001_19240000	Chr10	19220001	19240000	0.233565	-0.887959
Chr10_19230001_19250000	Chr10	19230001	19250000	0.24446	-0.849893
Chr10_19240001_19260000	Chr10	19240001	19260000	0.219771	-0.650275
Chr10_19250001_19270000	Chr10	19250001	19270000	0.207049	-0.677531
Chr10_19260001_19280000	Chr10	19260001	19280000	0.240627	-1.035
Chr10_19270001_19290000	Chr10	19270001	19290000	0.269359	-1.20157
Chr10_19280001_19300000	Chr10	19280001	19300000	0.272264	-1.0999
Chr10_19290001_19310000	Chr10	19290001	19310000	0.229007	-0.961517
Chr10_19300001_19320000	Chr10	19300001	19320000	0.224294	-0.89666
Chr10_19310001_19330000	Chr10	19310001	19330000	0.20193	-0.649902
Chr10_19320001_19340000	Chr10	19320001	19340000	0.204242	-0.935209
Chr10_19330001_19350000	Chr10	19330001	19350000	0.282896	-1.15379
Chr10_19340001_19360000	Chr10	19340001	19360000	0.329859	-1.1135
Chr10_19350001_19370000	Chr10	19350001	19370000	0.318712	-1.34366
Chr10_19360001_19380000	Chr10	19360001	19380000	0.349822	-1.3666
Chr10_19370001_19390000	Chr10	19370001	19390000	0.378	-1.58396
Chr10_19380001_19400000	Chr10	19380001	19400000	0.351016	-1.69704
Chr10_19390001_19410000	Chr10	19390001	19410000	0.359544	-0.67338
Chr10_19400001_19420000	Chr10	19400001	19420000	0.294716	-0.0535534
Chr10_19410001_19430000	Chr10	19410001	19430000	0.183369	0.264263
Chr10_19420001_19440000	Chr10	19420001	19440000	0.205009	0.252525
Chr10_19430001_19450000	Chr10	19430001	19450000	0.216887	0.141283
Chr10_19440001_19460000	Chr10	19440001	19460000	0.218356	0.154132
Chr10_19450001_19470000	Chr10	19450001	19470000	0.219752	0.171182
Chr10_19460001_19480000	Chr10	19460001	19480000	0.234815	-0.352393
Chr10_19470001_19490000	Chr10	19470001	19490000	0.243877	-1.70796
Chr10_19480001_19500000	Chr10	19480001	19500000	0.229104	-1.70412
Chr10_19490001_19510000	Chr10	19490001	19510000	0.222668	-1.00257
Chr10_19500001_19520000	Chr10	19500001	19520000	0.211588	0.126446
Chr10_19510001_19530000	Chr10	19510001	19530000	0.267644	0.13215
Chr10_19520001_19540000	Chr10	19520001	19540000	0.340685	-0.340079
Chr10_19530001_19550000	Chr10	19530001	19550000	0.367999	-0.649288
Chr10_19540001_19560000	Chr10	19540001	19560000	0.29217	-0.377354
Chr10_19550001_19570000	Chr10	19550001	19570000	0.231718	-0.255329
Chr10_19560001_19580000	Chr10	19560001	19580000	0.262314	-0.220134
Chr10_19570001_19590000	Chr10	19570001	19590000	0.30102	-0.606745
Chr10_19580001_19600000	Chr10	19580001	19600000	0.275767	-0.918195
Chr10_19590001_19610000	Chr10	19590001	19610000	0.267789	-1.05284
Chr10_19600001_19620000	Chr10	19600001	19620000	0.246447	-1.55763
Chr10_19610001_19630000	Chr10	19610001	19630000	0.219741	-0.901228
Chr10_19620001_19640000	Chr10	19620001	19640000	0.258332	-0.844929
Chr10_19630001_19650000	Chr10	19630001	19650000	0.290122	-1.52127
Chr10_19640001_19660000	Chr10	19640001	19660000	0.299402	-1.15598
Chr10_19650001_19670000	Chr10	19650001	19670000	0.303324	-0.850164
Chr10_19660001_19680000	Chr10	19660001	19680000	0.265856	-0.784744
Chr10_19670001_19690000	Chr10	19670001	19690000	0.118997	-0.654422
Chr10_19680001_19700000	Chr10	19680001	19700000	0.207731	-0.956709
Chr10_19690001_19710000	Chr10	19690001	19710000	0.26798	-0.876717
Chr10_19700001_19720000	Chr10	19700001	19720000	0.22699	-0.185821
Chr10_19710001_19730000	Chr10	19710001	19730000	0.191465	0.0714263
Chr10_19720001_19740000	Chr10	19720001	19740000	0.175005	-0.331505
Chr10_19730001_19750000	Chr10	19730001	19750000	0.190203	-0.876141
Chr10_19740001_19760000	Chr10	19740001	19760000	0.19751	-0.621672
Chr10_19750001_19770000	Chr10	19750001	19770000	0.184367	-0.402703
Chr10_19760001_19780000	Chr10	19760001	19780000	0.253076	-0.953797
Chr10_19770001_19790000	Chr10	19770001	19790000	0.288343	-1.41869
Chr10_19780001_19800000	Chr10	19780001	19800000	0.237641	-1.36074
Chr10_19790001_19810000	Chr10	19790001	19810000	0.208056	-1.15325
Chr10_19800001_19820000	Chr10	19800001	19820000	0.173196	-1.15244
Chr10_19810001_19830000	Chr10	19810001	19830000	0.174382	-1.07405
Chr10_19820001_19840000	Chr10	19820001	19840000	0.201846	-1.34675
Chr10_19830001_19850000	Chr10	19830001	19850000	0.201966	-1.57219
Chr10_19840001_19860000	Chr10	19840001	19860000	0.201945	-1.22291
Chr10_19850001_19870000	Chr10	19850001	19870000	0.147542	-0.666228
Chr10_19860001_19880000	Chr10	19860001	19880000	0.195998	-0.983438
Chr10_19870001_19890000	Chr10	19870001	19890000	0.221429	-1.03232
Chr10_19880001_19900000	Chr10	19880001	19900000	0.202294	-0.738407
Chr10_19890001_19910000	Chr10	19890001	19910000	0.273454	-0.960507
Chr10_19900001_19920000	Chr10	19900001	19920000	0.283352	-0.901262
Chr10_19910001_19930000	Chr10	19910001	19930000	0.304073	-0.931131
Chr10_19920001_19940000	Chr10	19920001	19940000	0.321232	-1.48324
Chr10_19930001_19950000	Chr10	19930001	19950000	0.306995	-1.54795
Chr10_19940001_19960000	Chr10	19940001	19960000	0.29844	-1.56874
Chr10_19950001_19970000	Chr10	19950001	19970000	0.241426	-0.611713
Chr10_19960001_19980000	Chr10	19960001	19980000	0.21199	-0.0944392
Chr10_19970001_19990000	Chr10	19970001	19990000	0.26359	-0.337358
[truncated: 263,183+ more rows]
