# Supplementary material for: Selection signatures in tropical cattle are enriched for promoter and coding regions and reveal missense mutations in the damage response gene HELB
Source: Genet Sel Evol. 2020 May 27;52:27. doi: 10.1186/s12711-020-00546-6 (PMC7251699; doi:10.1186/s12711-020-00546-6)
Supplement: Supplementary file 3 — Additional file 3: Table S2. 657 detected selective sweeps (20-kb) bins in European taurine cattle compared to Asian indicine. [file 12711_2020_546_MOESM3_ESM.xlsx]

## Sheet: Table S2
Table S2 : Detected Selective sweeps 20 Kb bins in Taurine cattle compared to Asian Indicine
Reg_id	chr	start	end	Fst	pi
Chr10_350001_370000	Chr10	350001	370000	0.413362	-2.6812
Chr10_22060001_22080000	Chr10	22060001	22080000	0.461501	-2.10206
Chr10_28110001_28130000	Chr10	28110001	28130000	0.549296	-1.8607
Chr10_30150001_30170000	Chr10	30150001	30170000	0.538178	-1.99066
Chr10_30160001_30180000	Chr10	30160001	30180000	0.561899	-2.18765
Chr10_30170001_30190000	Chr10	30170001	30190000	0.557151	-1.93381
Chr10_31160001_31180000	Chr10	31160001	31180000	0.530321	-2.07967
Chr10_31170001_31190000	Chr10	31170001	31190000	0.531482	-2.00778
Chr10_35640001_35660000	Chr10	35640001	35660000	0.496653	-2.0048
Chr10_35650001_35670000	Chr10	35650001	35670000	0.522428	-1.84389
Chr10_35700001_35720000	Chr10	35700001	35720000	0.488508	-2.05029
Chr10_35710001_35730000	Chr10	35710001	35730000	0.573184	-2.49263
Chr10_37370001_37390000	Chr10	37370001	37390000	0.548536	-1.9447
Chr10_43710001_43730000	Chr10	43710001	43730000	0.374715	-2.90103
Chr10_54930001_54950000	Chr10	54930001	54950000	0.478922	-2.1337
Chr10_66050001_66070000	Chr10	66050001	66070000	0.415978	-2.61313
Chr10_70260001_70280000	Chr10	70260001	70280000	0.473234	-2.33869
Chr10_70730001_70750000	Chr10	70730001	70750000	0.440974	-2.27597
Chr10_71200001_71220000	Chr10	71200001	71220000	0.477092	-2.56448
Chr10_80890001_80910000	Chr10	80890001	80910000	0.408464	-2.50753
Chr10_88880001_88900000	Chr10	88880001	88900000	0.460121	-2.2722
Chr10_92280001_92300000	Chr10	92280001	92300000	0.435884	-2.46136
Chr10_93990001_94010000	Chr10	93990001	94010000	0.434708	-2.3144
Chr11_14360001_14380000	Chr11	14360001	14380000	0.489711	-2.00041
Chr11_14450001_14470000	Chr11	14450001	14470000	0.487288	-2.40344
Chr11_14460001_14480000	Chr11	14460001	14480000	0.473927	-2.59343
Chr11_50650001_50670000	Chr11	50650001	50670000	0.473679	-2.18261
Chr11_50660001_50680000	Chr11	50660001	50680000	0.416149	-2.37964
Chr11_52460001_52480000	Chr11	52460001	52480000	0.451776	-2.58433
Chr11_52470001_52490000	Chr11	52470001	52490000	0.480532	-2.55911
Chr11_56010001_56030000	Chr11	56010001	56030000	0.459054	-2.42375
Chr11_56950001_56970000	Chr11	56950001	56970000	0.472668	-2.08447
Chr11_56980001_57000000	Chr11	56980001	57000000	0.543247	-2.0844
Chr11_63530001_63550000	Chr11	63530001	63550000	0.461813	-3.23119
Chr11_63540001_63560000	Chr11	63540001	63560000	0.444832	-3.14227
Chr11_63550001_63570000	Chr11	63550001	63570000	0.453721	-3.03577
Chr11_63560001_63580000	Chr11	63560001	63580000	0.414615	-3.25196
Chr11_63570001_63590000	Chr11	63570001	63590000	0.447163	-3.19295
Chr11_63580001_63600000	Chr11	63580001	63600000	0.444829	-2.44393
Chr11_71880001_71900000	Chr11	71880001	71900000	0.436101	-2.26096
Chr11_79230001_79250000	Chr11	79230001	79250000	0.507334	-2.09089
Chr11_79240001_79260000	Chr11	79240001	79260000	0.512053	-2.19805
Chr11_93920001_93940000	Chr11	93920001	93940000	0.419324	-2.89056
Chr11_101990001_102010000	Chr11	101990001	102010000	0.481045	-2.25448
Chr12_18670001_18690000	Chr12	18670001	18690000	0.46258	-2.0796
Chr12_21420001_21440000	Chr12	21420001	21440000	0.384331	-2.7812
Chr12_26120001_26140000	Chr12	26120001	26140000	0.529466	-1.89534
Chr12_26130001_26150000	Chr12	26130001	26150000	0.480292	-1.99737
Chr12_28240001_28260000	Chr12	28240001	28260000	0.529535	-1.9654
Chr12_33420001_33440000	Chr12	33420001	33440000	0.459402	-2.09968
Chr12_33430001_33450000	Chr12	33430001	33450000	0.483693	-2.40804
Chr12_36960001_36980000	Chr12	36960001	36980000	0.590263	-1.91701
Chr12_39120001_39140000	Chr12	39120001	39140000	0.482401	-2.23532
Chr12_42650001_42670000	Chr12	42650001	42670000	0.517087	-1.94223
Chr12_42660001_42680000	Chr12	42660001	42680000	0.568729	-2.03445
Chr12_42670001_42690000	Chr12	42670001	42690000	0.571977	-1.69589
Chr12_42780001_42800000	Chr12	42780001	42800000	0.458893	-2.19172
Chr12_43920001_43940000	Chr12	43920001	43940000	0.46993	-2.04317
Chr12_48330001_48350000	Chr12	48330001	48350000	0.679262	-1.60562
Chr12_49250001_49270000	Chr12	49250001	49270000	0.464769	-2.20389
Chr12_49320001_49340000	Chr12	49320001	49340000	0.500846	-1.92878
Chr12_49820001_49840000	Chr12	49820001	49840000	0.524844	-2.11397
Chr12_49830001_49850000	Chr12	49830001	49850000	0.484241	-1.97829
Chr12_51020001_51040000	Chr12	51020001	51040000	0.542598	-1.78451
Chr12_53350001_53370000	Chr12	53350001	53370000	0.496943	-2.66912
Chr12_59630001_59650000	Chr12	59630001	59650000	0.520856	-1.83524
Chr12_60110001_60130000	Chr12	60110001	60130000	0.400785	-2.55078
Chr12_61500001_61520000	Chr12	61500001	61520000	0.399506	-2.51363
Chr12_61510001_61530000	Chr12	61510001	61530000	0.461116	-2.29204
Chr12_61540001_61560000	Chr12	61540001	61560000	0.447365	-2.41355
Chr12_61550001_61570000	Chr12	61550001	61570000	0.442333	-2.59077
Chr12_61560001_61580000	Chr12	61560001	61580000	0.451631	-2.21451
Chr12_63340001_63360000	Chr12	63340001	63360000	0.46195	-2.22174
Chr12_89840001_89860000	Chr12	89840001	89860000	0.441263	-2.49956
Chr12_89850001_89870000	Chr12	89850001	89870000	0.430494	-2.892
Chr12_89920001_89940000	Chr12	89920001	89940000	0.450249	-2.2326
Chr12_89930001_89950000	Chr12	89930001	89950000	0.450168	-2.13919
Chr12_89940001_89960000	Chr12	89940001	89960000	0.441076	-2.40309
Chr12_89950001_89970000	Chr12	89950001	89970000	0.447614	-2.37077
Chr13_7300001_7320000	Chr13	7300001	7320000	0.547704	-1.91781
Chr13_7310001_7330000	Chr13	7310001	7330000	0.497803	-1.99542
Chr13_10790001_10810000	Chr13	10790001	10810000	0.376866	-2.86645
Chr13_11670001_11690000	Chr13	11670001	11690000	0.417519	-2.38835
Chr13_11690001_11710000	Chr13	11690001	11710000	0.423508	-2.30768
Chr13_11700001_11720000	Chr13	11700001	11720000	0.491006	-2.11298
Chr13_14470001_14490000	Chr13	14470001	14490000	0.411581	-2.40939
Chr13_20340001_20360000	Chr13	20340001	20360000	0.432074	-2.26865
Chr13_20350001_20370000	Chr13	20350001	20370000	0.468747	-2.33589
Chr13_20360001_20380000	Chr13	20360001	20380000	0.527654	-2.56589
Chr13_36350001_36370000	Chr13	36350001	36370000	0.501023	-2.08999
Chr13_63100001_63120000	Chr13	63100001	63120000	0.58166	-1.66449
Chr13_65670001_65690000	Chr13	65670001	65690000	0.466301	-2.39116
Chr14_13030001_13050000	Chr14	13030001	13050000	0.47341	-2.06186
Chr14_17190001_17210000	Chr14	17190001	17210000	0.433373	-2.2988
Chr14_21950001_21970000	Chr14	21950001	21970000	0.449765	-2.24493
Chr14_23420001_23440000	Chr14	23420001	23440000	0.456732	-2.22898
Chr14_23430001_23450000	Chr14	23430001	23450000	0.596131	-1.75921
Chr14_23440001_23460000	Chr14	23440001	23460000	0.546071	-1.76386
Chr14_23540001_23560000	Chr14	23540001	23560000	0.419148	-2.3986
Chr14_23550001_23570000	Chr14	23550001	23570000	0.428824	-2.38213
Chr14_44370001_44390000	Chr14	44370001	44390000	0.404821	-2.53729
Chr14_44400001_44420000	Chr14	44400001	44420000	0.414531	-2.43642
Chr14_46350001_46370000	Chr14	46350001	46370000	0.417202	-2.4083
Chr14_46490001_46510000	Chr14	46490001	46510000	0.486154	-2.14156
Chr14_46500001_46520000	Chr14	46500001	46520000	0.467175	-2.47151
Chr14_47180001_47200000	Chr14	47180001	47200000	0.566395	-2.03726
Chr14_47190001_47210000	Chr14	47190001	47210000	0.581757	-2.14603
Chr14_48770001_48790000	Chr14	48770001	48790000	0.46915	-2.0325
Chr14_49740001_49760000	Chr14	49740001	49760000	0.536331	-1.78055
Chr14_51080001_51100000	Chr14	51080001	51100000	0.559128	-1.97412
Chr14_51090001_51110000	Chr14	51090001	51110000	0.586369	-2.03143
Chr14_51130001_51150000	Chr14	51130001	51150000	0.502458	-2.21691
Chr14_51140001_51160000	Chr14	51140001	51160000	0.468389	-2.70979
Chr15_230001_250000	Chr15	230001	250000	0.459581	-2.58153
Chr15_240001_260000	Chr15	240001	260000	0.415493	-2.53119
Chr15_820001_840000	Chr15	820001	840000	0.369254	-2.93806
Chr15_830001_850000	Chr15	830001	850000	0.388107	-2.92852
Chr15_840001_860000	Chr15	840001	860000	0.393567	-2.77116
Chr15_2840001_2860000	Chr15	2840001	2860000	0.538825	-1.83683
Chr15_2850001_2870000	Chr15	2850001	2870000	0.558681	-2.02741
Chr15_3190001_3210000	Chr15	3190001	3210000	0.539958	-1.85862
Chr15_4130001_4150000	Chr15	4130001	4150000	0.506576	-1.9422
Chr15_11910001_11930000	Chr15	11910001	11930000	0.422396	-2.3389
Chr15_11920001_11940000	Chr15	11920001	11940000	0.552096	-2.82581
Chr15_11930001_11950000	Chr15	11930001	11950000	0.543822	-2.84768
Chr15_11940001_11960000	Chr15	11940001	11960000	0.468041	-2.55251
Chr15_11950001_11970000	Chr15	11950001	11970000	0.457087	-2.29938
Chr15_20170001_20190000	Chr15	20170001	20190000	0.61655	-1.98451
Chr15_21740001_21760000	Chr15	21740001	21760000	0.461607	-2.26525
Chr15_21920001_21940000	Chr15	21920001	21940000	0.398331	-2.56557
Chr15_21930001_21950000	Chr15	21930001	21950000	0.456174	-2.3606
Chr15_24240001_24260000	Chr15	24240001	24260000	0.421884	-2.3288
Chr15_31140001_31160000	Chr15	31140001	31160000	0.514192	-2.32027
Chr15_32970001_32990000	Chr15	32970001	32990000	0.404558	-2.63025
Chr15_35660001_35680000	Chr15	35660001	35680000	0.471639	-2.25119
Chr15_35730001_35750000	Chr15	35730001	35750000	0.490637	-2.16763
Chr15_35740001_35760000	Chr15	35740001	35760000	0.515035	-2.13267
Chr15_35760001_35780000	Chr15	35760001	35780000	0.465989	-2.1901
Chr15_35770001_35790000	Chr15	35770001	35790000	0.508536	-2.53746
Chr15_35780001_35800000	Chr15	35780001	35800000	0.465883	-2.7126
Chr15_35960001_35980000	Chr15	35960001	35980000	0.473656	-2.189
Chr15_55570001_55590000	Chr15	55570001	55590000	0.463695	-2.11836
Chr15_57840001_57860000	Chr15	57840001	57860000	0.451098	-2.47423
Chr15_57950001_57970000	Chr15	57950001	57970000	0.498501	-1.95956
Chr15_58210001_58230000	Chr15	58210001	58230000	0.591459	-1.85243
Chr15_62980001_63000000	Chr15	62980001	63000000	0.424995	-2.33307
Chr15_63040001_63060000	Chr15	63040001	63060000	0.455575	-2.22706
Chr15_63530001_63550000	Chr15	63530001	63550000	0.461622	-2.62429
Chr15_63540001_63560000	Chr15	63540001	63560000	0.445711	-2.48977
Chr15_63630001_63650000	Chr15	63630001	63650000	0.400468	-2.70031
Chr15_77810001_77830000	Chr15	77810001	77830000	0.424857	-3.03273
Chr15_77820001_77840000	Chr15	77820001	77840000	0.436519	-3.0915
Chr15_77830001_77850000	Chr15	77830001	77850000	0.405748	-2.78745
Chr15_80080001_80100000	Chr15	80080001	80100000	0.440766	-2.32757
Chr15_80090001_80110000	Chr15	80090001	80110000	0.413883	-2.74239
Chr16_27100001_27120000	Chr16	27100001	27120000	0.473181	-2.31221
Chr16_29720001_29740000	Chr16	29720001	29740000	0.443354	-2.45735
Chr16_31040001_31060000	Chr16	31040001	31060000	0.421443	-2.43693
Chr16_33460001_33480000	Chr16	33460001	33480000	0.420946	-2.57532
Chr16_40420001_40440000	Chr16	40420001	40440000	0.561867	-1.83439
Chr16_40430001_40450000	Chr16	40430001	40450000	0.537997	-1.99105
Chr16_40440001_40460000	Chr16	40440001	40460000	0.573072	-1.79518
Chr16_41130001_41150000	Chr16	41130001	41150000	0.442763	-2.52486
Chr16_41670001_41690000	Chr16	41670001	41690000	0.526456	-1.90042
Chr16_42320001_42340000	Chr16	42320001	42340000	0.484239	-1.99473
Chr16_42330001_42350000	Chr16	42330001	42350000	0.462214	-2.29284
Chr16_44550001_44570000	Chr16	44550001	44570000	0.460939	-2.07386
Chr16_44560001_44580000	Chr16	44560001	44580000	0.482384	-2.00737
Chr16_50330001_50350000	Chr16	50330001	50350000	0.493667	-2.52308
Chr16_58040001_58060000	Chr16	58040001	58060000	0.514201	-2.11391
Chr16_75040001_75060000	Chr16	75040001	75060000	0.439955	-2.22141
Chr17_36310001_36330000	Chr17	36310001	36330000	0.493707	-2.02227
Chr17_36320001_36340000	Chr17	36320001	36340000	0.530659	-1.91477
Chr17_42970001_42990000	Chr17	42970001	42990000	0.482863	-2.17698
Chr17_42980001_43000000	Chr17	42980001	43000000	0.466617	-2.13554
Chr17_49240001_49260000	Chr17	49240001	49260000	0.450614	-2.77984
Chr17_49250001_49270000	Chr17	49250001	49270000	0.453217	-2.48746
Chr17_56800001_56820000	Chr17	56800001	56820000	0.490557	-2.01613
Chr17_67670001_67690000	Chr17	67670001	67690000	0.450289	-2.80571
Chr17_67680001_67700000	Chr17	67680001	67700000	0.477575	-2.5005
Chr17_69760001_69780000	Chr17	69760001	69780000	0.616901	-1.84944
Chr17_69770001_69790000	Chr17	69770001	69790000	0.631275	-1.83989
Chr17_69780001_69800000	Chr17	69780001	69800000	0.621962	-1.7743
Chr17_69790001_69810000	Chr17	69790001	69810000	0.612765	-2.0168
Chr18_2410001_2430000	Chr18	2410001	2430000	0.564762	-1.76942
Chr18_11770001_11790000	Chr18	11770001	11790000	0.514725	-1.87787
Chr18_14690001_14710000	Chr18	14690001	14710000	0.590738	-1.73664
Chr18_14720001_14740000	Chr18	14720001	14740000	0.595299	-1.89473
Chr18_14730001_14750000	Chr18	14730001	14750000	0.534763	-2.62324
Chr18_14740001_14760000	Chr18	14740001	14760000	0.482707	-2.31145
Chr18_22920001_22940000	Chr18	22920001	22940000	0.442616	-2.28436
Chr18_34630001_34650000	Chr18	34630001	34650000	0.399562	-2.80305
Chr18_39820001_39840000	Chr18	39820001	39840000	0.49441	-1.9466
Chr18_47010001_47030000	Chr18	47010001	47030000	0.447256	-2.21869
Chr19_180001_200000	Chr19	180001	200000	0.433381	-2.41572
Chr19_190001_210000	Chr19	190001	210000	0.43842	-2.42884
Chr19_330001_350000	Chr19	330001	350000	0.590465	-1.73918
Chr19_510001_530000	Chr19	510001	530000	0.392425	-2.7358
Chr19_520001_540000	Chr19	520001	540000	0.421061	-2.60013
Chr19_6470001_6490000	Chr19	6470001	6490000	0.404559	-2.57461
Chr19_6480001_6500000	Chr19	6480001	6500000	0.450645	-2.71474
Chr19_46720001_46740000	Chr19	46720001	46740000	0.474539	-2.09942
Chr19_46730001_46750000	Chr19	46730001	46750000	0.51971	-2.2116
Chr19_46740001_46760000	Chr19	46740001	46760000	0.484897	-1.97145
Chr19_46750001_46770000	Chr19	46750001	46770000	0.506393	-2.15538
Chr19_46760001_46780000	Chr19	46760001	46780000	0.574316	-2.24596
Chr19_46770001_46790000	Chr19	46770001	46790000	0.552474	-1.73724
Chr19_47630001_47650000	Chr19	47630001	47650000	0.447718	-2.14834
Chr19_57600001_57620000	Chr19	57600001	57620000	0.487849	-2.07321
Chr1_8580001_8600000	Chr1	8580001	8600000	0.524337	-2.238
Chr1_21630001_21650000	Chr1	21630001	21650000	0.498885	-1.97753
Chr1_30130001_30150000	Chr1	30130001	30150000	0.520904	-2.09556
Chr1_30140001_30160000	Chr1	30140001	30160000	0.522574	-2.58647
Chr1_30150001_30170000	Chr1	30150001	30170000	0.486778	-2.65645
Chr1_35500001_35520000	Chr1	35500001	35520000	0.445881	-2.43861
Chr1_59230001_59250000	Chr1	59230001	59250000	0.454051	-2.34873
Chr1_84590001_84610000	Chr1	84590001	84610000	0.540575	-2.03975
Chr1_84600001_84620000	Chr1	84600001	84620000	0.501386	-2.01758
Chr1_89610001_89630000	Chr1	89610001	89630000	0.47754	-2.20474
Chr1_99760001_99780000	Chr1	99760001	99780000	0.579803	-1.70296
Chr1_100110001_100130000	Chr1	100110001	100130000	0.47683	-2.3384
Chr1_100120001_100140000	Chr1	100120001	100140000	0.441853	-2.25688
Chr1_101520001_101540000	Chr1	101520001	101540000	0.412676	-2.8465
Chr1_101530001_101550000	Chr1	101530001	101550000	0.462659	-2.43228
Chr1_107850001_107870000	Chr1	107850001	107870000	0.475741	-2.01185
Chr1_109930001_109950000	Chr1	109930001	109950000	0.583678	-2.00518
Chr1_109940001_109960000	Chr1	109940001	109960000	0.546202	-2.17773
Chr1_113440001_113460000	Chr1	113440001	113460000	0.472484	-2.5483
Chr1_115660001_115680000	Chr1	115660001	115680000	0.45595	-2.16041
Chr1_115670001_115690000	Chr1	115670001	115690000	0.459976	-2.3029
Chr1_115810001_115830000	Chr1	115810001	115830000	0.516298	-2.18992
Chr1_116970001_116990000	Chr1	116970001	116990000	0.39686	-2.54979
Chr1_120390001_120410000	Chr1	120390001	120410000	0.392141	-2.61522
Chr1_122110001_122130000	Chr1	122110001	122130000	0.457398	-2.36643
Chr1_122120001_122140000	Chr1	122120001	122140000	0.462626	-2.40204
Chr1_122130001_122150000	Chr1	122130001	122150000	0.487438	-2.32223
Chr1_122140001_122160000	Chr1	122140001	122160000	0.483343	-2.62377
Chr1_122150001_122170000	Chr1	122150001	122170000	0.488818	-2.65997
Chr1_122160001_122180000	Chr1	122160001	122180000	0.535162	-2.22933
Chr1_127470001_127490000	Chr1	127470001	127490000	0.468196	-2.68956
Chr1_136540001_136560000	Chr1	136540001	136560000	0.446165	-2.16821
Chr1_137850001_137870000	Chr1	137850001	137870000	0.417255	-2.63353
Chr1_137860001_137880000	Chr1	137860001	137880000	0.459539	-2.68599
Chr1_137870001_137890000	Chr1	137870001	137890000	0.434745	-2.48789
Chr1_137880001_137900000	Chr1	137880001	137900000	0.452948	-2.31695
Chr20_10440001_10460000	Chr20	10440001	10460000	0.464613	-2.51613
Chr20_10450001_10470000	Chr20	10450001	10470000	0.460777	-2.31135
Chr20_10460001_10480000	Chr20	10460001	10480000	0.506425	-2.30017
Chr20_14420001_14440000	Chr20	14420001	14440000	0.483226	-1.99656
Chr20_14670001_14690000	Chr20	14670001	14690000	0.419203	-2.37031
Chr20_14770001_14790000	Chr20	14770001	14790000	0.417442	-2.3987
Chr20_15030001_15050000	Chr20	15030001	15050000	0.441884	-2.23702
Chr20_15040001_15060000	Chr20	15040001	15060000	0.438083	-2.42917
Chr20_15050001_15070000	Chr20	15050001	15070000	0.480936	-2.46757
Chr20_15060001_15080000	Chr20	15060001	15080000	0.455974	-2.22211
Chr20_15080001_15100000	Chr20	15080001	15100000	0.472584	-2.57037
Chr20_25130001_25150000	Chr20	25130001	25150000	0.397386	-2.89716
Chr20_25140001_25160000	Chr20	25140001	25160000	0.374423	-2.83759
Chr20_30760001_30780000	Chr20	30760001	30780000	0.518968	-2.00856
Chr20_58970001_58990000	Chr20	58970001	58990000	0.464561	-2.11717
Chr20_71660001_71680000	Chr20	71660001	71680000	0.525922	-1.90566
Chr20_71670001_71690000	Chr20	71670001	71690000	0.515829	-2.18511
Chr21_31690001_31710000	Chr21	31690001	31710000	0.669765	-1.59634
Chr21_31720001_31740000	Chr21	31720001	31740000	0.434277	-2.51223
Chr21_31730001_31750000	Chr21	31730001	31750000	0.44817	-2.59138
Chr21_32040001_32060000	Chr21	32040001	32060000	0.532127	-1.86045
Chr21_32050001_32070000	Chr21	32050001	32070000	0.554594	-1.81583
Chr21_32300001_32320000	Chr21	32300001	32320000	0.563451	-1.90832
Chr21_32310001_32330000	Chr21	32310001	32330000	0.681936	-2.04132
Chr21_32320001_32340000	Chr21	32320001	32340000	0.650905	-1.84668
Chr21_32360001_32380000	Chr21	32360001	32380000	0.461334	-2.24892
Chr21_32740001_32760000	Chr21	32740001	32760000	0.554497	-2.09548
Chr21_32750001_32770000	Chr21	32750001	32770000	0.58716	-1.88258
Chr21_38130001_38150000	Chr21	38130001	38150000	0.578863	-2.18311
Chr21_41400001_41420000	Chr21	41400001	41420000	0.4874	-2.27192
Chr21_41410001_41430000	Chr21	41410001	41430000	0.443635	-2.47205
Chr21_43460001_43480000	Chr21	43460001	43480000	0.510589	-1.95005
Chr21_43470001_43490000	Chr21	43470001	43490000	0.484094	-2.25033
Chr21_44480001_44500000	Chr21	44480001	44500000	0.430465	-2.45177
Chr21_60840001_60860000	Chr21	60840001	60860000	0.430669	-2.60557
Chr21_60870001_60890000	Chr21	60870001	60890000	0.442409	-2.74342
Chr21_60880001_60900000	Chr21	60880001	60900000	0.416679	-2.46687
Chr22_13300001_13320000	Chr22	13300001	13320000	0.454702	-2.15921
Chr22_33710001_33730000	Chr22	33710001	33730000	0.430285	-2.49048
Chr22_49110001_49130000	Chr22	49110001	49130000	0.476196	-2.29908
Chr23_4850001_4870000	Chr23	4850001	4870000	0.508118	-2.079
Chr23_16490001_16510000	Chr23	16490001	16510000	0.438707	-2.31038
Chr23_37120001_37140000	Chr23	37120001	37140000	0.534253	-1.91407
Chr23_41620001_41640000	Chr23	41620001	41640000	0.443365	-2.17967
Chr24_1_20000	Chr24	1	20000	0.596425	-3.16629
Chr24_10001_30000	Chr24	10001	30000	0.515239	-3.05474
Chr24_60001_80000	Chr24	60001	80000	0.541379	-2.75747
Chr24_70001_90000	Chr24	70001	90000	0.619864	-3.25251
Chr24_80001_100000	Chr24	80001	100000	0.585569	-3.35455
Chr24_90001_110000	Chr24	90001	110000	0.497554	-3.24722
Chr24_100001_120000	Chr24	100001	120000	0.445575	-3.15269
Chr24_130001_150000	Chr24	130001	150000	0.431722	-2.50734
Chr24_160001_180000	Chr24	160001	180000	0.372858	-2.85586
Chr24_170001_190000	Chr24	170001	190000	0.37754	-3.16011
Chr24_530001_550000	Chr24	530001	550000	0.534984	-2.00818
Chr24_24650001_24670000	Chr24	24650001	24670000	0.452445	-2.34188
Chr24_27400001_27420000	Chr24	27400001	27420000	0.459737	-2.0813
Chr24_31410001_31430000	Chr24	31410001	31430000	0.479441	-2.46846
Chr24_31420001_31440000	Chr24	31420001	31440000	0.420066	-2.65575
Chr24_31430001_31450000	Chr24	31430001	31450000	0.396735	-2.68528
Chr24_43910001_43930000	Chr24	43910001	43930000	0.505272	-1.96223
Chr24_43920001_43940000	Chr24	43920001	43940000	0.487929	-2.06689
Chr24_49390001_49410000	Chr24	49390001	49410000	0.523161	-1.85161
Chr24_49400001_49420000	Chr24	49400001	49420000	0.54603	-1.87621
Chr24_50690001_50710000	Chr24	50690001	50710000	0.457561	-2.22179
Chr24_57340001_57360000	Chr24	57340001	57360000	0.503251	-2.08786
Chr24_57350001_57370000	Chr24	57350001	57370000	0.46737	-2.1232
Chr24_61020001_61040000	Chr24	61020001	61040000	0.554533	-1.7332
Chr26_20560001_20580000	Chr26	20560001	20580000	0.478187	-2.08019
Chr26_20570001_20590000	Chr26	20570001	20590000	0.517226	-2.45996
Chr26_45450001_45470000	Chr26	45450001	45470000	0.488687	-3.00964
Chr27_5700001_5720000	Chr27	5700001	5720000	0.600691	-1.61241
Chr27_17540001_17560000	Chr27	17540001	17560000	0.447057	-2.18007
Chr27_17550001_17570000	Chr27	17550001	17570000	0.45725	-2.16196
Chr27_25210001_25230000	Chr27	25210001	25230000	0.510426	-2.07161
Chr27_27620001_27640000	Chr27	27620001	27640000	0.419933	-2.48457
Chr27_27630001_27650000	Chr27	27630001	27650000	0.421876	-2.51798
Chr27_29420001_29440000	Chr27	29420001	29440000	0.45444	-2.16708
Chr27_29430001_29450000	Chr27	29430001	29450000	0.410913	-2.46924
Chr27_34520001_34540000	Chr27	34520001	34540000	0.441009	-2.58443
Chr27_34530001_34550000	Chr27	34530001	34550000	0.436916	-2.46902
Chr27_34840001_34860000	Chr27	34840001	34860000	0.384245	-2.92797
Chr28_2740001_2760000	Chr28	2740001	2760000	0.41006	-2.6033
Chr28_2750001_2770000	Chr28	2750001	2770000	0.413496	-2.57043
Chr28_2760001_2780000	Chr28	2760001	2780000	0.424742	-2.63898
Chr28_2770001_2790000	Chr28	2770001	2790000	0.434752	-2.83005
Chr28_21240001_21260000	Chr28	21240001	21260000	0.492115	-2.49044
Chr28_21250001_21270000	Chr28	21250001	21270000	0.450618	-2.27881
Chr28_23830001_23850000	Chr28	23830001	23850000	0.412353	-2.71684
Chr28_25370001_25390000	Chr28	25370001	25390000	0.470823	-2.12392
Chr28_27250001_27270000	Chr28	27250001	27270000	0.459354	-2.26302
Chr28_28800001_28820000	Chr28	28800001	28820000	0.477188	-2.18988
Chr28_39090001_39110000	Chr28	39090001	39110000	0.441742	-2.37243
Chr28_41920001_41940000	Chr28	41920001	41940000	0.440406	-2.19656
Chr28_44870001_44890000	Chr28	44870001	44890000	0.488113	-2.14174
Chr28_44880001_44900000	Chr28	44880001	44900000	0.496878	-2.43513
Chr28_44890001_44910000	Chr28	44890001	44910000	0.439353	-2.34935
Chr29_15460001_15480000	Chr29	15460001	15480000	0.486313	-1.98283
Chr29_15470001_15490000	Chr29	15470001	15490000	0.492769	-2.24283
Chr29_32320001_32340000	Chr29	32320001	32340000	0.430041	-2.42077
Chr2_200001_220000	Chr2	200001	220000	0.389433	-2.7074
Chr2_6310001_6330000	Chr2	6310001	6330000	0.427824	-2.42346
Chr2_6320001_6340000	Chr2	6320001	6340000	0.420433	-2.68305
Chr2_10810001_10830000	Chr2	10810001	10830000	0.540517	-1.94274
Chr2_22900001_22920000	Chr2	22900001	22920000	0.423508	-2.36274
Chr2_22920001_22940000	Chr2	22920001	22940000	0.445069	-2.32629
Chr2_22940001_22960000	Chr2	22940001	22960000	0.438863	-2.22346
Chr2_22950001_22970000	Chr2	22950001	22970000	0.46457	-2.25916
Chr2_44620001_44640000	Chr2	44620001	44640000	0.489208	-2.03177
Chr2_45540001_45560000	Chr2	45540001	45560000	0.514858	-1.8654
Chr2_88770001_88790000	Chr2	88770001	88790000	0.390639	-2.62298
Chr2_97580001_97600000	Chr2	97580001	97600000	0.535835	-1.85455
Chr2_104690001_104710000	Chr2	104690001	104710000	0.45875	-2.36636
Chr2_116190001_116210000	Chr2	116190001	116210000	0.449038	-2.48376
Chr2_116200001_116220000	Chr2	116200001	116220000	0.430351	-2.76189
Chr2_120410001_120430000	Chr2	120410001	120430000	0.583132	-1.85093
Chr2_122260001_122280000	Chr2	122260001	122280000	0.456806	-2.27783
Chr2_122270001_122290000	Chr2	122270001	122290000	0.532301	-2.40217
Chr2_122280001_122300000	Chr2	122280001	122300000	0.533886	-1.93057
Chr2_125340001_125360000	Chr2	125340001	125360000	0.446104	-2.31335
Chr2_125470001_125490000	Chr2	125470001	125490000	0.564889	-2.43831
Chr2_125480001_125500000	Chr2	125480001	125500000	0.530972	-2.29576
Chr2_125500001_125520000	Chr2	125500001	125520000	0.459915	-2.14097
ChrX_6100001_6120000	ChrX	6100001	6120000	0.444908	-2.3104
ChrX_9950001_9970000	ChrX	9950001	9970000	0.56654	-2.19314
ChrX_12060001_12080000	ChrX	12060001	12080000	0.494725	-2.13192
ChrX_12070001_12090000	ChrX	12070001	12090000	0.512644	-2.04363
ChrX_26090001_26110000	ChrX	26090001	26110000	0.379498	-2.72668
ChrX_29330001_29350000	ChrX	29330001	29350000	0.517167	-1.92917
ChrX_29340001_29360000	ChrX	29340001	29360000	0.591253	-2.2721
ChrX_29350001_29370000	ChrX	29350001	29370000	0.574222	-1.90276
ChrX_29370001_29390000	ChrX	29370001	29390000	0.577551	-2.08734
ChrX_29380001_29400000	ChrX	29380001	29400000	0.577655	-2.33075
ChrX_29390001_29410000	ChrX	29390001	29410000	0.49445	-2.08158
ChrX_30540001_30560000	ChrX	30540001	30560000	0.497409	-2.45876
ChrX_30550001_30570000	ChrX	30550001	30570000	0.477802	-2.70824
ChrX_30560001_30580000	ChrX	30560001	30580000	0.478143	-2.6937
ChrX_30570001_30590000	ChrX	30570001	30590000	0.477544	-2.4788
ChrX_30580001_30600000	ChrX	30580001	30600000	0.431199	-2.43838
ChrX_30590001_30610000	ChrX	30590001	30610000	0.393425	-2.69177
ChrX_32290001_32310000	ChrX	32290001	32310000	0.530261	-1.96387
ChrX_33390001_33410000	ChrX	33390001	33410000	0.509251	-2.04026
ChrX_33400001_33420000	ChrX	33400001	33420000	0.470909	-2.27261
ChrX_33480001_33500000	ChrX	33480001	33500000	0.464637	-2.21342
ChrX_33490001_33510000	ChrX	33490001	33510000	0.420658	-2.40479
ChrX_33650001_33670000	ChrX	33650001	33670000	0.572485	-1.69657
ChrX_33660001_33680000	ChrX	33660001	33680000	0.580252	-1.68099
ChrX_33830001_33850000	ChrX	33830001	33850000	0.441936	-2.30329
ChrX_33840001_33860000	ChrX	33840001	33860000	0.528229	-1.88851
ChrX_33850001_33870000	ChrX	33850001	33870000	0.534329	-1.90374
ChrX_48960001_48980000	ChrX	48960001	48980000	0.410365	-2.59148
ChrX_48970001_48990000	ChrX	48970001	48990000	0.426697	-2.28703
ChrX_49360001_49380000	ChrX	49360001	49380000	0.534516	-1.8639
ChrX_52200001_52220000	ChrX	52200001	52220000	0.585067	-1.91566
ChrX_52210001_52230000	ChrX	52210001	52230000	0.597451	-1.97
ChrX_52220001_52240000	ChrX	52220001	52240000	0.538942	-1.95106
ChrX_52230001_52250000	ChrX	52230001	52250000	0.58215	-2.06635
ChrX_52240001_52260000	ChrX	52240001	52260000	0.59219	-1.95418
ChrX_52250001_52270000	ChrX	52250001	52270000	0.614854	-1.96244
ChrX_52260001_52280000	ChrX	52260001	52280000	0.63848	-1.84579
ChrX_57390001_57410000	ChrX	57390001	57410000	0.556429	-2.42382
ChrX_57400001_57420000	ChrX	57400001	57420000	0.51772	-2.20849
ChrX_57630001_57650000	ChrX	57630001	57650000	0.563948	-2.21088
ChrX_57640001_57660000	ChrX	57640001	57660000	0.580256	-1.85336
ChrX_59060001_59080000	ChrX	59060001	59080000	0.38513	-2.99599
ChrX_61660001_61680000	ChrX	61660001	61680000	0.587017	-1.70991
ChrX_61670001_61690000	ChrX	61670001	61690000	0.65039	-1.84477
ChrX_61710001_61730000	ChrX	61710001	61730000	0.600724	-1.72985
ChrX_62710001_62730000	ChrX	62710001	62730000	0.584833	-1.76416
ChrX_62720001_62740000	ChrX	62720001	62740000	0.611811	-1.84296
ChrX_72290001_72310000	ChrX	72290001	72310000	0.436359	-2.42606
ChrX_72300001_72320000	ChrX	72300001	72320000	0.431372	-2.32462
ChrX_72340001_72360000	ChrX	72340001	72360000	0.434865	-2.23964
ChrX_72360001_72380000	ChrX	72360001	72380000	0.453142	-2.22156
ChrX_72370001_72390000	ChrX	72370001	72390000	0.491	-2.45009
ChrX_72380001_72400000	ChrX	72380001	72400000	0.440904	-2.32274
ChrX_80430001_80450000	ChrX	80430001	80450000	0.486906	-2.35078
ChrX_80440001_80460000	ChrX	80440001	80460000	0.48206	-2.35413
ChrX_80450001_80470000	ChrX	80450001	80470000	0.471496	-2.39239
ChrX_80460001_80480000	ChrX	80460001	80480000	0.433979	-2.27049
ChrX_83340001_83360000	ChrX	83340001	83360000	0.522011	-2.13732
ChrX_83350001_83370000	ChrX	83350001	83370000	0.455423	-2.15422
ChrX_85100001_85120000	ChrX	85100001	85120000	0.477655	-2.34042
ChrX_85200001_85220000	ChrX	85200001	85220000	0.640948	-1.92162
ChrX_85210001_85230000	ChrX	85210001	85230000	0.589064	-1.75979
ChrX_85220001_85240000	ChrX	85220001	85240000	0.566731	-1.75739
ChrX_85230001_85250000	ChrX	85230001	85250000	0.637672	-1.76534
ChrX_85320001_85340000	ChrX	85320001	85340000	0.492404	-2.43732
ChrX_85330001_85350000	ChrX	85330001	85350000	0.513308	-3.23104
ChrX_85340001_85360000	ChrX	85340001	85360000	0.521243	-3.48749
ChrX_85350001_85370000	ChrX	85350001	85370000	0.517928	-3.24515
ChrX_85360001_85380000	ChrX	85360001	85380000	0.531088	-2.94484
ChrX_85370001_85390000	ChrX	85370001	85390000	0.607024	-2.63713
ChrX_85380001_85400000	ChrX	85380001	85400000	0.663081	-1.99108
ChrX_85390001_85410000	ChrX	85390001	85410000	0.719494	-1.91321
ChrX_85400001_85420000	ChrX	85400001	85420000	0.756571	-2.07179
ChrX_85410001_85430000	ChrX	85410001	85430000	0.660629	-1.8899
ChrX_85420001_85440000	ChrX	85420001	85440000	0.632079	-1.72597
ChrX_85430001_85450000	ChrX	85430001	85450000	0.736147	-1.87953
ChrX_85440001_85460000	ChrX	85440001	85460000	0.778826	-1.89804
ChrX_85450001_85470000	ChrX	85450001	85470000	0.789309	-1.88071
ChrX_85460001_85480000	ChrX	85460001	85480000	0.725396	-1.7395
ChrX_85470001_85490000	ChrX	85470001	85490000	0.695802	-1.79278
ChrX_85480001_85500000	ChrX	85480001	85500000	0.690216	-1.80247
ChrX_86290001_86310000	ChrX	86290001	86310000	0.479328	-2.26314
ChrX_86300001_86320000	ChrX	86300001	86320000	0.461455	-2.20417
ChrX_86320001_86340000	ChrX	86320001	86340000	0.433704	-2.27008
ChrX_86770001_86790000	ChrX	86770001	86790000	0.415139	-2.40044
ChrX_86780001_86800000	ChrX	86780001	86800000	0.388187	-2.66075
ChrX_87060001_87080000	ChrX	87060001	87080000	0.525716	-1.81308
ChrX_87280001_87300000	ChrX	87280001	87300000	0.398512	-2.52948
ChrX_87570001_87590000	ChrX	87570001	87590000	0.443554	-2.4734
ChrX_87620001_87640000	ChrX	87620001	87640000	0.498889	-2.05374
ChrX_87630001_87650000	ChrX	87630001	87650000	0.485307	-1.98142
ChrX_88290001_88310000	ChrX	88290001	88310000	0.429607	-2.3244
ChrX_88300001_88320000	ChrX	88300001	88320000	0.412186	-2.4271
ChrX_88370001_88390000	ChrX	88370001	88390000	0.436921	-2.83525
ChrX_88450001_88470000	ChrX	88450001	88470000	0.434541	-2.46271
ChrX_90340001_90360000	ChrX	90340001	90360000	0.446915	-2.53732
ChrX_90350001_90370000	ChrX	90350001	90370000	0.471932	-2.67805
ChrX_90360001_90380000	ChrX	90360001	90380000	0.455346	-2.388
ChrX_95490001_95510000	ChrX	95490001	95510000	0.516298	-1.9496
ChrX_96680001_96700000	ChrX	96680001	96700000	0.439505	-2.23251
ChrX_105100001_105120000	ChrX	105100001	105120000	0.467136	-2.14915
ChrX_116080001_116100000	ChrX	116080001	116100000	0.482755	-2.02369
ChrX_117620001_117640000	ChrX	117620001	117640000	0.444472	-2.76744
ChrX_117630001_117650000	ChrX	117630001	117650000	0.439255	-2.48049
ChrX_123400001_123420000	ChrX	123400001	123420000	0.431718	-2.26959
ChrX_123410001_123430000	ChrX	123410001	123430000	0.488199	-2.32685
ChrX_125200001_125220000	ChrX	125200001	125220000	0.542396	-2.22346
ChrX_125210001_125230000	ChrX	125210001	125230000	0.500356	-1.95412
ChrX_127140001_127160000	ChrX	127140001	127160000	0.443739	-2.62523
ChrX_130490001_130510000	ChrX	130490001	130510000	0.486288	-2.02775
ChrX_130610001_130630000	ChrX	130610001	130630000	0.457985	-2.29296
ChrX_130650001_130670000	ChrX	130650001	130670000	0.411339	-2.52295
ChrX_130660001_130680000	ChrX	130660001	130680000	0.422223	-2.43911
ChrX_130720001_130740000	ChrX	130720001	130740000	0.50108	-2.05123
Chr3_4030001_4050000	Chr3	4030001	4050000	0.445515	-2.17398
Chr3_34960001_34980000	Chr3	34960001	34980000	0.413037	-2.42733
Chr3_64830001_64850000	Chr3	64830001	64850000	0.423211	-2.44422
Chr3_70030001_70050000	Chr3	70030001	70050000	0.480548	-2.06074
Chr3_72330001_72350000	Chr3	72330001	72350000	0.465114	-2.34378
Chr3_72940001_72960000	Chr3	72940001	72960000	0.378644	-2.76836
Chr3_76810001_76830000	Chr3	76810001	76830000	0.480658	-2.11938
Chr3_77300001_77320000	Chr3	77300001	77320000	0.433925	-2.3371
Chr3_84800001_84820000	Chr3	84800001	84820000	0.619007	-1.73998
Chr3_88580001_88600000	Chr3	88580001	88600000	0.440556	-2.26472
Chr4_8670001_8690000	Chr4	8670001	8690000	0.512456	-1.92238
Chr4_13350001_13370000	Chr4	13350001	13370000	0.477746	-2.08017
Chr4_19260001_19280000	Chr4	19260001	19280000	0.432369	-2.45391
Chr4_20800001_20820000	Chr4	20800001	20820000	0.467349	-2.11834
Chr4_21490001_21510000	Chr4	21490001	21510000	0.525324	-1.98508
Chr4_23370001_23390000	Chr4	23370001	23390000	0.453795	-2.11275
Chr4_32910001_32930000	Chr4	32910001	32930000	0.435771	-2.65389
Chr4_34590001_34610000	Chr4	34590001	34610000	0.459364	-2.36041
Chr4_39850001_39870000	Chr4	39850001	39870000	0.437958	-2.6065
Chr4_39860001_39880000	Chr4	39860001	39880000	0.486241	-2.47592
Chr4_42040001_42060000	Chr4	42040001	42060000	0.468079	-2.09391
Chr4_42050001_42070000	Chr4	42050001	42070000	0.507495	-2.05315
Chr4_49490001_49510000	Chr4	49490001	49510000	0.474281	-2.06048
Chr4_87820001_87840000	Chr4	87820001	87840000	0.470489	-2.20605
Chr4_95260001_95280000	Chr4	95260001	95280000	0.464634	-2.30976
Chr4_95270001_95290000	Chr4	95270001	95290000	0.48451	-2.3836
Chr4_97630001_97650000	Chr4	97630001	97650000	0.460557	-2.08995
Chr4_97640001_97660000	Chr4	97640001	97660000	0.469714	-2.03388
Chr4_100410001_100430000	Chr4	100410001	100430000	0.468122	-2.53054
Chr4_100420001_100440000	Chr4	100420001	100440000	0.443253	-2.46805
Chr4_120640001_120660000	Chr4	120640001	120660000	0.505093	-1.90416
Chr5_18130001_18150000	Chr5	18130001	18150000	0.430065	-2.69444
Chr5_18140001_18160000	Chr5	18140001	18160000	0.383812	-3.10297
Chr5_27780001_27800000	Chr5	27780001	27800000	0.517093	-1.89104
Chr5_31480001_31500000	Chr5	31480001	31500000	0.494728	-2.05712
Chr5_35120001_35140000	Chr5	35120001	35140000	0.467316	-2.1109
Chr5_35780001_35800000	Chr5	35780001	35800000	0.395348	-2.66075
Chr5_35790001_35810000	Chr5	35790001	35810000	0.420516	-2.72297
Chr5_35820001_35840000	Chr5	35820001	35840000	0.558817	-2.25177
Chr5_35830001_35850000	Chr5	35830001	35850000	0.494325	-2.35548
Chr5_35850001_35870000	Chr5	35850001	35870000	0.425263	-2.39944
Chr5_37010001_37030000	Chr5	37010001	37030000	0.52458	-1.87712
Chr5_39240001_39260000	Chr5	39240001	39260000	0.43427	-2.36978
Chr5_39250001_39270000	Chr5	39250001	39270000	0.450911	-2.7664
Chr5_40860001_40880000	Chr5	40860001	40880000	0.59029	-1.66055
Chr5_40870001_40890000	Chr5	40870001	40890000	0.488908	-1.97515
Chr5_42710001_42730000	Chr5	42710001	42730000	0.440148	-2.36064
Chr5_42730001_42750000	Chr5	42730001	42750000	0.43802	-2.35074
Chr5_42740001_42760000	Chr5	42740001	42760000	0.457957	-2.56701
Chr5_47560001_47580000	Chr5	47560001	47580000	0.582913	-2.16628
Chr5_47570001_47590000	Chr5	47570001	47590000	0.541539	-2.2475
Chr5_50650001_50670000	Chr5	50650001	50670000	0.43168	-3.00156
Chr5_52890001_52910000	Chr5	52890001	52910000	0.401296	-2.73952
Chr5_52900001_52920000	Chr5	52900001	52920000	0.412863	-2.57402
Chr5_53020001_53040000	Chr5	53020001	53040000	0.54922	-1.83379
Chr5_53030001_53050000	Chr5	53030001	53050000	0.64532	-2.10899
Chr5_53040001_53060000	Chr5	53040001	53060000	0.608081	-2.07552
Chr5_55100001_55120000	Chr5	55100001	55120000	0.456933	-2.23679
Chr5_56700001_56720000	Chr5	56700001	56720000	0.450241	-2.17183
Chr5_56730001_56750000	Chr5	56730001	56750000	0.501329	-1.93053
Chr5_56780001_56800000	Chr5	56780001	56800000	0.453503	-2.19005
Chr5_56790001_56810000	Chr5	56790001	56810000	0.44231	-2.47605
Chr5_60760001_60780000	Chr5	60760001	60780000	0.557105	-1.875
Chr5_60770001_60790000	Chr5	60770001	60790000	0.575839	-2.1496
Chr5_61320001_61340000	Chr5	61320001	61340000	0.515279	-2.13359
Chr5_61330001_61350000	Chr5	61330001	61350000	0.533078	-2.34652
Chr5_67990001_68010000	Chr5	67990001	68010000	0.520997	-1.93027
Chr5_68790001_68810000	Chr5	68790001	68810000	0.445828	-2.67796
Chr5_68800001_68820000	Chr5	68800001	68820000	0.412434	-2.84784
Chr5_78560001_78580000	Chr5	78560001	78580000	0.592995	-1.70856
Chr5_82690001_82710000	Chr5	82690001	82710000	0.407874	-2.45881
Chr5_85310001_85330000	Chr5	85310001	85330000	0.506186	-2.50702
Chr5_85320001_85340000	Chr5	85320001	85340000	0.487363	-2.27417
Chr5_91580001_91600000	Chr5	91580001	91600000	0.609651	-1.9079
Chr5_91590001_91610000	Chr5	91590001	91610000	0.54661	-2.04818
Chr5_95620001_95640000	Chr5	95620001	95640000	0.42604	-2.40022
Chr5_98910001_98930000	Chr5	98910001	98930000	0.452893	-2.4598
Chr5_115180001_115200000	Chr5	115180001	115200000	0.370778	-3.17705
Chr5_115190001_115210000	Chr5	115190001	115210000	0.369319	-3.19257
Chr6_21250001_21270000	Chr6	21250001	21270000	0.47852	-2.24185
Chr6_43040001_43060000	Chr6	43040001	43060000	0.48589	-2.20107
Chr6_71510001_71530000	Chr6	71510001	71530000	0.576701	-1.93327
Chr6_71520001_71540000	Chr6	71520001	71540000	0.611043	-2.06234
Chr6_71530001_71550000	Chr6	71530001	71550000	0.491246	-2.01105
Chr6_73720001_73740000	Chr6	73720001	73740000	0.603716	-1.71256
Chr6_75670001_75690000	Chr6	75670001	75690000	0.467212	-2.14848
Chr6_75680001_75700000	Chr6	75680001	75700000	0.485986	-2.23682
Chr6_77270001_77290000	Chr6	77270001	77290000	0.4485	-2.19573
Chr6_97120001_97140000	Chr6	97120001	97140000	0.498863	-1.9961
Chr6_115130001_115150000	Chr6	115130001	115150000	0.402966	-2.54613
Chr7_3020001_3040000	Chr7	3020001	3040000	0.44138	-2.30404
Chr7_3030001_3050000	Chr7	3030001	3050000	0.463301	-2.3739
Chr7_20010001_20030000	Chr7	20010001	20030000	0.429507	-2.4874
Chr7_22920001_22940000	Chr7	22920001	22940000	0.486048	-2.07606
Chr7_23380001_23400000	Chr7	23380001	23400000	0.443082	-2.43765
Chr7_25480001_25500000	Chr7	25480001	25500000	0.394416	-2.56012
Chr7_25490001_25510000	Chr7	25490001	25510000	0.373117	-2.81512
Chr7_27020001_27040000	Chr7	27020001	27040000	0.441536	-2.41613
Chr7_30530001_30550000	Chr7	30530001	30550000	0.467854	-2.06193
Chr7_41000001_41020000	Chr7	41000001	41020000	0.520303	-1.92958
Chr7_41180001_41200000	Chr7	41180001	41200000	0.553849	-1.80464
Chr7_42950001_42970000	Chr7	42950001	42970000	0.417117	-2.47812
Chr7_42960001_42980000	Chr7	42960001	42980000	0.473061	-2.3638
Chr7_42980001_43000000	Chr7	42980001	43000000	0.469474	-2.46768
Chr7_43320001_43340000	Chr7	43320001	43340000	0.449634	-2.14631
Chr7_48450001_48470000	Chr7	48450001	48470000	0.505862	-1.92873
Chr7_49630001_49650000	Chr7	49630001	49650000	0.506198	-1.97477
Chr7_49710001_49730000	Chr7	49710001	49730000	0.468263	-2.21133
Chr7_51940001_51960000	Chr7	51940001	51960000	0.673541	-1.62809
Chr7_51970001_51990000	Chr7	51970001	51990000	0.680307	-1.49511
Chr7_54980001_55000000	Chr7	54980001	55000000	0.387651	-3.43526
Chr7_54990001_55010000	Chr7	54990001	55010000	0.403837	-3.26339
Chr7_55000001_55020000	Chr7	55000001	55020000	0.408067	-3.30898
Chr7_55010001_55030000	Chr7	55010001	55030000	0.39228	-3.65156
Chr7_55020001_55040000	Chr7	55020001	55040000	0.385855	-3.95337
Chr7_55030001_55050000	Chr7	55030001	55050000	0.359364	-3.27976
Chr7_71740001_71760000	Chr7	71740001	71760000	0.446423	-2.26654
Chr7_79990001_80010000	Chr7	79990001	80010000	0.479437	-2.33687
Chr7_80000001_80020000	Chr7	80000001	80020000	0.51767	-2.36582
Chr7_88500001_88520000	Chr7	88500001	88520000	0.48912	-2.11688
Chr7_92110001_92130000	Chr7	92110001	92130000	0.546889	-1.84249
Chr7_92120001_92140000	Chr7	92120001	92140000	0.573175	-1.94185
Chr7_92740001_92760000	Chr7	92740001	92760000	0.571513	-1.94015
Chr7_93420001_93440000	Chr7	93420001	93440000	0.543233	-1.84657
Chr7_101440001_101460000	Chr7	101440001	101460000	0.55508	-2.23601
Chr7_101450001_101470000	Chr7	101450001	101470000	0.565204	-2.01865
Chr7_102670001_102690000	Chr7	102670001	102690000	0.383932	-2.85993
Chr7_102680001_102700000	Chr7	102680001	102700000	0.41776	-2.89715
Chr7_102690001_102710000	Chr7	102690001	102710000	0.405741	-2.77142
Chr8_280001_300000	Chr8	280001	300000	0.513791	-1.91746
Chr8_13690001_13710000	Chr8	13690001	13710000	0.518341	-2.0211
Chr8_21460001_21480000	Chr8	21460001	21480000	0.474029	-2.01834
Chr8_33240001_33260000	Chr8	33240001	33260000	0.517412	-1.93426
Chr8_44310001_44330000	Chr8	44310001	44330000	0.404459	-2.6068
Chr8_44320001_44340000	Chr8	44320001	44340000	0.5653	-2.24059
Chr8_44330001_44350000	Chr8	44330001	44350000	0.509951	-2.63819
Chr8_44340001_44360000	Chr8	44340001	44360000	0.419469	-2.44393
Chr8_47020001_47040000	Chr8	47020001	47040000	0.403113	-2.51784
Chr8_47030001_47050000	Chr8	47030001	47050000	0.467441	-2.30942
Chr8_53280001_53300000	Chr8	53280001	53300000	0.586713	-1.96907
Chr8_54330001_54350000	Chr8	54330001	54350000	0.552734	-2.32826
Chr8_54340001_54360000	Chr8	54340001	54360000	0.561313	-2.19032
Chr8_56180001_56200000	Chr8	56180001	56200000	0.487767	-2.32132
Chr8_56190001_56210000	Chr8	56190001	56210000	0.438271	-2.56105
Chr8_58280001_58300000	Chr8	58280001	58300000	0.55578	-1.89272
Chr8_58290001_58310000	Chr8	58290001	58310000	0.505621	-1.90827
Chr8_58950001_58970000	Chr8	58950001	58970000	0.471414	-2.75296
Chr8_58960001_58980000	Chr8	58960001	58980000	0.457661	-2.87359
Chr8_63030001_63050000	Chr8	63030001	63050000	0.38854	-2.67057
Chr8_65080001_65100000	Chr8	65080001	65100000	0.484428	-2.84485
Chr8_65090001_65110000	Chr8	65090001	65110000	0.51519	-2.69341
Chr8_73190001_73210000	Chr8	73190001	73210000	0.451235	-2.70448
Chr8_73580001_73600000	Chr8	73580001	73600000	0.417481	-2.3618
Chr8_85060001_85080000	Chr8	85060001	85080000	0.528159	-1.82267
Chr8_86430001_86450000	Chr8	86430001	86450000	0.511193	-1.88543
Chr8_100040001_100060000	Chr8	100040001	100060000	0.429644	-2.36638
Chr8_100050001_100070000	Chr8	100050001	100070000	0.480123	-2.06757
Chr8_107620001_107640000	Chr8	107620001	107640000	0.488448	-2.04743
Chr9_13000001_13020000	Chr9	13000001	13020000	0.624643	-1.99224
Chr9_13010001_13030000	Chr9	13010001	13030000	0.640037	-2.13274
Chr9_21410001_21430000	Chr9	21410001	21430000	0.438215	-2.27516
Chr9_25650001_25670000	Chr9	25650001	25670000	0.531344	-1.79641
Chr9_46020001_46040000	Chr9	46020001	46040000	0.411997	-2.72123
Chr9_46830001_46850000	Chr9	46830001	46850000	0.453778	-2.32884
Chr9_49150001_49170000	Chr9	49150001	49170000	0.434664	-2.48766
Chr9_49160001_49180000	Chr9	49160001	49180000	0.432625	-2.41066
Chr9_53840001_53860000	Chr9	53840001	53860000	0.477842	-2.10857
Chr9_61670001_61690000	Chr9	61670001	61690000	0.36304	-2.95562
Chr9_62990001_63010000	Chr9	62990001	63010000	0.48335	-2.14472
Chr9_63190001_63210000	Chr9	63190001	63210000	0.557867	-2.00799
Chr9_63200001_63220000	Chr9	63200001	63220000	0.56125	-2.11282
Chr9_63340001_63360000	Chr9	63340001	63360000	0.521983	-2.44397
Chr9_63350001_63370000	Chr9	63350001	63370000	0.501348	-2.27691
Chr9_70840001_70860000	Chr9	70840001	70860000	0.420437	-2.56597
Chr9_89920001_89940000	Chr9	89920001	89940000	0.450643	-2.23167
