# Supplementary material for: Selection signatures in tropical cattle are enriched for promoter and coding regions and reveal missense mutations in the damage response gene HELB
Source: Genet Sel Evol. 2020 May 27;52:27. doi: 10.1186/s12711-020-00546-6 (PMC7251699; doi:10.1186/s12711-020-00546-6)
Supplement: Supplementary file 4 — Additional file 4: Table S3. 242 detected selective sweeps (20-kb) bins in Asian indicine compared to European taurine. [file 12711_2020_546_MOESM4_ESM.xlsx]

## Sheet: Table S3
Table S3: Detected Selective sweeps (20 Kb) bins in Asian Indicine compared to European Taurine
Reg_id	chr	start	end	Fst	pi
Chr10_38100001_38120000	Chr10	38100001	38120000	0.363778	1.07093
Chr10_79160001_79180000	Chr10	79160001	79180000	0.411821	0.631229
Chr12_24570001_24590000	Chr12	24570001	24590000	0.385422	0.731944
Chr12_28950001_28970000	Chr12	28950001	28970000	0.434086	0.789223
Chr12_29010001_29030000	Chr12	29010001	29030000	0.465553	0.402096
Chr12_29020001_29040000	Chr12	29020001	29040000	0.545201	0.666812
Chr12_29030001_29050000	Chr12	29030001	29050000	0.429275	0.622054
Chr12_29650001_29670000	Chr12	29650001	29670000	0.423551	0.755689
Chr12_29660001_29680000	Chr12	29660001	29680000	0.366046	0.94552
Chr12_29670001_29690000	Chr12	29670001	29690000	0.371599	1.07832
Chr12_33760001_33780000	Chr12	33760001	33780000	0.349104	1.2583
Chr12_33770001_33790000	Chr12	33770001	33790000	0.448685	0.507077
Chr12_33780001_33800000	Chr12	33780001	33800000	0.487235	0.308631
Chr12_37870001_37890000	Chr12	37870001	37890000	0.609069	0.140899
Chr12_37880001_37900000	Chr12	37880001	37900000	0.591014	0.136459
Chr12_38020001_38040000	Chr12	38020001	38040000	0.553527	-0.0438107
Chr12_38030001_38050000	Chr12	38030001	38050000	0.602765	-0.0158496
Chr13_5380001_5400000	Chr13	5380001	5400000	0.480723	0.185621
Chr13_5390001_5410000	Chr13	5390001	5410000	0.532935	0.617092
Chr13_5400001_5420000	Chr13	5400001	5420000	0.608448	0.297802
Chr13_5410001_5430000	Chr13	5410001	5430000	0.592144	0.260045
Chr13_5420001_5440000	Chr13	5420001	5440000	0.569539	0.373849
Chr13_5430001_5450000	Chr13	5430001	5450000	0.571124	0.780748
Chr13_5440001_5460000	Chr13	5440001	5460000	0.578893	0.900739
Chr13_5450001_5470000	Chr13	5450001	5470000	0.611991	0.748348
Chr13_5460001_5480000	Chr13	5460001	5480000	0.608398	0.821529
Chr13_5470001_5490000	Chr13	5470001	5490000	0.574825	0.394874
Chr13_5500001_5520000	Chr13	5500001	5520000	0.564934	0.765364
Chr13_5510001_5530000	Chr13	5510001	5530000	0.630909	0.356277
Chr13_5550001_5570000	Chr13	5550001	5570000	0.677814	0.127204
Chr13_41530001_41550000	Chr13	41530001	41550000	0.446919	0.498437
Chr13_48730001_48750000	Chr13	48730001	48750000	0.428706	0.658135
Chr13_48740001_48760000	Chr13	48740001	48760000	0.440084	0.65135
Chr13_48750001_48770000	Chr13	48750001	48770000	0.433327	0.55649
Chr15_44270001_44290000	Chr15	44270001	44290000	0.475099	0.213701
Chr16_48870001_48890000	Chr16	48870001	48890000	0.384606	0.815828
Chr17_35690001_35710000	Chr17	35690001	35710000	0.501028	0.88134
Chr17_35700001_35720000	Chr17	35700001	35720000	0.370085	1.06568
Chr17_35960001_35980000	Chr17	35960001	35980000	0.405015	0.907755
Chr17_35970001_35990000	Chr17	35970001	35990000	0.466278	1.48089
Chr17_35980001_36000000	Chr17	35980001	36000000	0.517977	1.7124
Chr18_2960001_2980000	Chr18	2960001	2980000	0.519926	0.42849
Chr18_14210001_14230000	Chr18	14210001	14230000	0.384654	0.741663
Chr18_39710001_39730000	Chr18	39710001	39730000	0.469584	0.598123
Chr18_39720001_39740000	Chr18	39720001	39740000	0.399238	0.945735
Chr19_28050001_28070000	Chr19	28050001	28070000	0.539392	0.205666
Chr19_28060001_28080000	Chr19	28060001	28080000	0.588291	0.113202
Chr19_28480001_28500000	Chr19	28480001	28500000	0.664238	0.070591
Chr19_28490001_28510000	Chr19	28490001	28510000	0.593625	0.353275
Chr1_43720001_43740000	Chr1	43720001	43740000	0.499596	0.153772
Chr1_43730001_43750000	Chr1	43730001	43750000	0.48653	0.122391
Chr1_116490001_116510000	Chr1	116490001	116510000	0.465866	0.260461
Chr20_66070001_66090000	Chr20	66070001	66090000	0.466585	0.425205
Chr21_32490001_32510000	Chr21	32490001	32510000	0.536531	0.0367553
Chr22_35200001_35220000	Chr22	35200001	35220000	0.555857	0.342086
Chr22_35210001_35230000	Chr22	35210001	35230000	0.547959	-0.00190301
Chr22_39780001_39800000	Chr22	39780001	39800000	0.73989	0.592499
Chr22_39790001_39810000	Chr22	39790001	39810000	0.506182	0.172283
Chr22_39870001_39890000	Chr22	39870001	39890000	0.534615	0.244258
Chr22_39880001_39900000	Chr22	39880001	39900000	0.61179	0.378501
Chr22_40050001_40070000	Chr22	40050001	40070000	0.558529	0.165931
Chr25_14580001_14600000	Chr25	14580001	14600000	0.462135	0.401725
Chr29_28520001_28540000	Chr29	28520001	28540000	0.387717	0.935016
Chr29_28530001_28550000	Chr29	28530001	28550000	0.449087	0.339706
Chr2_63270001_63290000	Chr2	63270001	63290000	0.381744	0.778072
Chr2_70670001_70690000	Chr2	70670001	70690000	0.508298	0.350756
Chr2_70680001_70700000	Chr2	70680001	70700000	0.423008	0.655473
Chr2_89480001_89500000	Chr2	89480001	89500000	0.464819	0.500963
ChrX_55790001_55810000	ChrX	55790001	55810000	0.472607	0.388945
ChrX_55820001_55840000	ChrX	55820001	55840000	0.510708	0.19535
ChrX_58030001_58050000	ChrX	58030001	58050000	0.620977	0.378004
ChrX_58060001_58080000	ChrX	58060001	58080000	0.668697	0.0329865
ChrX_58070001_58090000	ChrX	58070001	58090000	0.6594	0.556684
ChrX_58080001_58100000	ChrX	58080001	58100000	0.603884	0.578377
ChrX_58090001_58110000	ChrX	58090001	58110000	0.682333	0.216952
ChrX_58100001_58120000	ChrX	58100001	58120000	0.639494	0.316528
ChrX_58110001_58130000	ChrX	58110001	58130000	0.607755	0.529957
ChrX_58190001_58210000	ChrX	58190001	58210000	0.72195	0.291147
ChrX_58200001_58220000	ChrX	58200001	58220000	0.673063	0.298803
ChrX_58210001_58230000	ChrX	58210001	58230000	0.565112	0.00779956
ChrX_74380001_74400000	ChrX	74380001	74400000	0.433679	0.436966
ChrX_142520001_142540000	ChrX	142520001	142540000	0.60889	0.608432
ChrX_142550001_142570000	ChrX	142550001	142570000	0.715518	0.0125245
ChrX_142560001_142580000	ChrX	142560001	142580000	0.511563	0.0725777
ChrX_142570001_142590000	ChrX	142570001	142590000	0.545522	0.636574
ChrX_142580001_142600000	ChrX	142580001	142600000	0.693205	1.01875
ChrX_142590001_142610000	ChrX	142590001	142610000	0.733432	0.785762
ChrX_142600001_142620000	ChrX	142600001	142620000	0.7161	0.59378
ChrX_142610001_142630000	ChrX	142610001	142630000	0.552812	0.412068
ChrX_142660001_142680000	ChrX	142660001	142680000	0.695193	0.345371
ChrX_142670001_142690000	ChrX	142670001	142690000	0.66959	0.174775
ChrX_143080001_143100000	ChrX	143080001	143100000	0.542203	0.829835
ChrX_143090001_143110000	ChrX	143090001	143110000	0.414712	0.703279
ChrX_143100001_143120000	ChrX	143100001	143120000	0.5847	0.512581
ChrX_143110001_143130000	ChrX	143110001	143130000	0.592331	0.197089
ChrX_143120001_143140000	ChrX	143120001	143140000	0.469059	0.247055
ChrX_143130001_143150000	ChrX	143130001	143150000	0.599002	0.540949
ChrX_143150001_143170000	ChrX	143150001	143170000	0.711152	0.126691
ChrX_143160001_143180000	ChrX	143160001	143180000	0.572742	-0.000338305
ChrX_143170001_143190000	ChrX	143170001	143190000	0.51529	0.493157
ChrX_143180001_143200000	ChrX	143180001	143200000	0.554515	0.755138
ChrX_143190001_143210000	ChrX	143190001	143210000	0.642942	0.494696
ChrX_143200001_143220000	ChrX	143200001	143220000	0.584066	0.501086
ChrX_143210001_143230000	ChrX	143210001	143230000	0.512937	0.689758
ChrX_143220001_143240000	ChrX	143220001	143240000	0.60781	0.412308
ChrX_143230001_143250000	ChrX	143230001	143250000	0.734387	0.14351
ChrX_143240001_143260000	ChrX	143240001	143260000	0.708901	0.228078
ChrX_143250001_143270000	ChrX	143250001	143270000	0.571144	0.472489
ChrX_143260001_143280000	ChrX	143260001	143280000	0.624112	0.377019
ChrX_143270001_143290000	ChrX	143270001	143290000	0.650562	0.320407
ChrX_143280001_143300000	ChrX	143280001	143300000	0.673196	0.503313
ChrX_143290001_143310000	ChrX	143290001	143310000	0.490333	0.602924
ChrX_143300001_143320000	ChrX	143300001	143320000	0.440906	0.75524
ChrX_143340001_143360000	ChrX	143340001	143360000	0.468234	0.387678
ChrX_143350001_143370000	ChrX	143350001	143370000	0.655156	0.256121
ChrX_143730001_143750000	ChrX	143730001	143750000	0.50735	0.177327
ChrX_143750001_143770000	ChrX	143750001	143770000	0.448973	0.500509
ChrX_143760001_143780000	ChrX	143760001	143780000	0.59473	0.413071
ChrX_143770001_143790000	ChrX	143770001	143790000	0.527958	0.421409
ChrX_143790001_143810000	ChrX	143790001	143810000	0.501308	0.765292
ChrX_143800001_143820000	ChrX	143800001	143820000	0.521806	0.647345
ChrX_143940001_143960000	ChrX	143940001	143960000	0.442621	0.840813
ChrX_143950001_143970000	ChrX	143950001	143970000	0.509344	0.341683
ChrX_143960001_143980000	ChrX	143960001	143980000	0.749271	0.56077
ChrX_143970001_143990000	ChrX	143970001	143990000	0.674047	0.616249
ChrX_144100001_144120000	ChrX	144100001	144120000	0.55745	0.518481
ChrX_144110001_144130000	ChrX	144110001	144130000	0.770512	0.524483
ChrX_144120001_144140000	ChrX	144120001	144140000	0.778069	0.42462
ChrX_144130001_144150000	ChrX	144130001	144150000	0.671012	0.446459
ChrX_144140001_144160000	ChrX	144140001	144160000	0.659828	0.531398
ChrX_144150001_144170000	ChrX	144150001	144170000	0.573053	0.333302
ChrX_144160001_144180000	ChrX	144160001	144180000	0.556934	0.464598
ChrX_144170001_144190000	ChrX	144170001	144190000	0.54953	0.629389
ChrX_144180001_144200000	ChrX	144180001	144200000	0.617772	0.492857
ChrX_144300001_144320000	ChrX	144300001	144320000	0.447191	0.462939
ChrX_144410001_144430000	ChrX	144410001	144430000	0.46942	0.411075
ChrX_144750001_144770000	ChrX	144750001	144770000	0.526541	0.307613
Chr3_76030001_76050000	Chr3	76030001	76050000	0.410523	0.529652
Chr4_103910001_103930000	Chr4	103910001	103930000	0.363903	1.11404
Chr4_103920001_103940000	Chr4	103920001	103940000	0.390874	0.977606
Chr4_104140001_104160000	Chr4	104140001	104160000	0.490096	0.739541
Chr4_104150001_104170000	Chr4	104150001	104170000	0.446124	0.636833
Chr5_22520001_22540000	Chr5	22520001	22540000	0.530343	0.511241
Chr5_22530001_22550000	Chr5	22530001	22550000	0.544962	0.461451
Chr5_22550001_22570000	Chr5	22550001	22570000	0.490382	0.334953
Chr5_22560001_22580000	Chr5	22560001	22580000	0.496441	0.595217
Chr5_22570001_22590000	Chr5	22570001	22590000	0.437929	0.708689
Chr5_47670001_47690000	Chr5	47670001	47690000	0.413101	1.10396
Chr5_47700001_47720000	Chr5	47700001	47720000	0.504423	0.346424
Chr5_47710001_47730000	Chr5	47710001	47730000	0.692653	1.2055
Chr5_47740001_47760000	Chr5	47740001	47760000	0.452211	0.397228
Chr5_47770001_47790000	Chr5	47770001	47790000	0.466661	0.42857
Chr5_47780001_47800000	Chr5	47780001	47800000	0.546696	0.248118
Chr5_47790001_47810000	Chr5	47790001	47810000	0.497997	0.201321
Chr5_47840001_47860000	Chr5	47840001	47860000	0.561708	0.0485779
Chr5_47850001_47870000	Chr5	47850001	47870000	0.697511	0.355981
Chr5_47860001_47880000	Chr5	47860001	47880000	0.690512	-0.248741
Chr5_47920001_47940000	Chr5	47920001	47940000	0.450429	1.08251
Chr5_47930001_47950000	Chr5	47930001	47950000	0.519975	1.26718
Chr5_47940001_47960000	Chr5	47940001	47960000	0.415651	1.43804
Chr5_47970001_47990000	Chr5	47970001	47990000	0.421003	0.538654
Chr5_47980001_48000000	Chr5	47980001	48000000	0.573553	1.13163
Chr5_47990001_48010000	Chr5	47990001	48010000	0.524169	1.29557
Chr5_48000001_48020000	Chr5	48000001	48020000	0.520804	1.97352
Chr5_48010001_48030000	Chr5	48010001	48030000	0.64489	1.30955
Chr5_48020001_48040000	Chr5	48020001	48040000	0.720701	0.757301
Chr5_48030001_48050000	Chr5	48030001	48050000	0.618275	1.68203
Chr5_48070001_48090000	Chr5	48070001	48090000	0.44754	1.9101
Chr5_48080001_48100000	Chr5	48080001	48100000	0.473011	0.799524
Chr5_48690001_48710000	Chr5	48690001	48710000	0.407837	0.613427
Chr5_48700001_48720000	Chr5	48700001	48720000	0.478298	0.835262
Chr5_48710001_48730000	Chr5	48710001	48730000	0.571662	1.4072
Chr5_48720001_48740000	Chr5	48720001	48740000	0.688998	0.758433
Chr5_48730001_48750000	Chr5	48730001	48750000	0.678163	-0.275642
Chr5_48840001_48860000	Chr5	48840001	48860000	0.426889	1.04423
Chr5_48850001_48870000	Chr5	48850001	48870000	0.493044	1.6903
Chr5_48860001_48880000	Chr5	48860001	48880000	0.445817	1.49053
Chr5_48870001_48890000	Chr5	48870001	48890000	0.489208	0.863434
Chr5_48880001_48900000	Chr5	48880001	48900000	0.56846	1.66153
Chr5_67880001_67900000	Chr5	67880001	67900000	0.42079	0.491428
Chr5_90010001_90030000	Chr5	90010001	90030000	0.382397	0.958735
Chr5_90020001_90040000	Chr5	90020001	90040000	0.41434	0.919271
Chr6_33550001_33570000	Chr6	33550001	33570000	0.460588	0.369042
Chr6_33560001_33580000	Chr6	33560001	33580000	0.534268	0.396923
Chr6_33570001_33590000	Chr6	33570001	33590000	0.581856	0.152976
Chr6_33580001_33600000	Chr6	33580001	33600000	0.5771	-0.0803645
Chr6_33590001_33610000	Chr6	33590001	33610000	0.53826	-0.030155
Chr6_33620001_33640000	Chr6	33620001	33640000	0.510615	0.0501903
Chr6_33630001_33650000	Chr6	33630001	33650000	0.531992	0.0735215
Chr6_33640001_33660000	Chr6	33640001	33660000	0.501423	0.306844
Chr6_33720001_33740000	Chr6	33720001	33740000	0.497436	0.646608
Chr6_33730001_33750000	Chr6	33730001	33750000	0.434904	0.868428
Chr6_33740001_33760000	Chr6	33740001	33760000	0.36704	0.917401
Chr6_38280001_38300000	Chr6	38280001	38300000	0.468261	0.232909
Chr6_38290001_38310000	Chr6	38290001	38310000	0.558589	-0.0310617
Chr6_53110001_53130000	Chr6	53110001	53130000	0.377842	1.34096
Chr6_73460001_73480000	Chr6	73460001	73480000	0.434252	0.376153
Chr6_73470001_73490000	Chr6	73470001	73490000	0.518778	0.149594
Chr6_73590001_73610000	Chr6	73590001	73610000	0.491004	0.165846
Chr6_73600001_73620000	Chr6	73600001	73620000	0.39902	0.681891
Chr6_78250001_78270000	Chr6	78250001	78270000	0.449782	0.820601
Chr6_90600001_90620000	Chr6	90600001	90620000	0.44435	0.786885
Chr7_32330001_32350000	Chr7	32330001	32350000	0.395496	0.774395
Chr7_32340001_32360000	Chr7	32340001	32360000	0.398119	0.813908
Chr7_32350001_32370000	Chr7	32350001	32370000	0.42254	0.743762
Chr7_44250001_44270000	Chr7	44250001	44270000	0.46584	0.500216
Chr7_44260001_44280000	Chr7	44260001	44280000	0.451542	0.688113
Chr7_44270001_44290000	Chr7	44270001	44290000	0.554104	0.949673
Chr7_44280001_44300000	Chr7	44280001	44300000	0.677822	0.952281
Chr7_44290001_44310000	Chr7	44290001	44310000	0.591472	0.556361
Chr7_44300001_44320000	Chr7	44300001	44320000	0.593997	-0.00751406
Chr7_44330001_44350000	Chr7	44330001	44350000	0.566933	0.609203
Chr7_44340001_44360000	Chr7	44340001	44360000	0.604393	0.857684
Chr7_44350001_44370000	Chr7	44350001	44370000	0.522125	0.581179
Chr7_44360001_44380000	Chr7	44360001	44380000	0.590274	0.424937
Chr7_44370001_44390000	Chr7	44370001	44390000	0.780953	0.412555
Chr7_44380001_44400000	Chr7	44380001	44400000	0.572743	0.230799
Chr7_47140001_47160000	Chr7	47140001	47160000	0.384143	0.724352
Chr7_79170001_79190000	Chr7	79170001	79190000	0.511524	0.318714
Chr7_79230001_79250000	Chr7	79230001	79250000	0.535238	0.111433
Chr8_25160001_25180000	Chr8	25160001	25180000	0.642941	-0.229808
Chr8_25170001_25190000	Chr8	25170001	25190000	0.581325	0.114887
Chr8_32610001_32630000	Chr8	32610001	32630000	0.534898	0.492735
Chr8_32620001_32640000	Chr8	32620001	32640000	0.47278	0.281292
Chr8_32670001_32690000	Chr8	32670001	32690000	0.463968	0.66032
Chr8_32680001_32700000	Chr8	32680001	32700000	0.450392	0.802255
Chr8_39730001_39750000	Chr8	39730001	39750000	0.519779	0.0494312
Chr8_47460001_47480000	Chr8	47460001	47480000	0.481469	0.324556
Chr8_48020001_48040000	Chr8	48020001	48040000	0.522308	0.0449942
Chr8_48030001_48050000	Chr8	48030001	48050000	0.463499	0.2817
Chr8_53470001_53490000	Chr8	53470001	53490000	0.384487	1.0011
Chr8_53480001_53500000	Chr8	53480001	53500000	0.350836	1.15842
Chr8_53490001_53510000	Chr8	53490001	53510000	0.426481	1.24354
Chr8_53500001_53520000	Chr8	53500001	53520000	0.482796	1.04771
Chr8_53510001_53530000	Chr8	53510001	53530000	0.504072	0.863647
Chr8_53520001_53540000	Chr8	53520001	53540000	0.526254	0.566331
Chr8_53530001_53550000	Chr8	53530001	53550000	0.544378	0.368081
Chr8_53540001_53560000	Chr8	53540001	53560000	0.580471	-0.013388
Chr8_53550001_53570000	Chr8	53550001	53570000	0.623391	-0.196894
Chr8_53560001_53580000	Chr8	53560001	53580000	0.574422	-0.088023
Chr8_53590001_53610000	Chr8	53590001	53610000	0.58543	-0.107787
Chr8_53620001_53640000	Chr8	53620001	53640000	0.46089	0.549453
