# Supplementary material for: Selection signatures in tropical cattle are enriched for promoter and coding regions and reveal missense mutations in the damage response gene HELB
Source: Genet Sel Evol. 2020 May 27;52:27. doi: 10.1186/s12711-020-00546-6 (PMC7251699; doi:10.1186/s12711-020-00546-6)
Supplement: Supplementary file 6 — Additional file 6: Table S5. Detected selective sweeps in Asian indicine cattle based on FST and nucleotide diversity across Asian Bos indicus and European Bos taurus cattle (p.adj < 0.05) and their association with the closest genes. [file 12711_2020_546_MOESM6_ESM.xlsx]

## Sheet: Table S5
Table S5 :Detected Selective Sweeps in Asian Indicine cattle based on Fst and nucleotide diversity across Bos indicus and Bos Taurus cattle (p.adj <0.05) and closest genes to regions
Region_id	Chr	Start	End	Length(bp)	Average rnk Fst & Pi	rnk Fst	rnk Pi	Fst	Pi	Gene Name	Gene ID	closest gene_id	closest gene_name	Distance to closest gene (bp)
5_47670001_48100000	5	47670001	48100000	429999	4.5	8	1	0.720701	1.97352	FAU;LLPH;5S_rRNA;HELB;IRAK3;;ENSBTAG00000026993;GRIP1;HMGA2	ENSBTAG00000031786;ENSBTAG00000002004;ENSBTAG00000045454;ENSBTAG00000020806;ENSBTAG00000007636;ENSBTAG00000026993;ENSBTAG00000033726;ENSBTAG00000044118	ENSBTAG00000033726;ENSBTAG00000020806;ENSBTAG00000031786;ENSBTAG00000007636;ENSBTAG00000026993;ENSBTAG00000002004;ENSBTAG00000045454;ENSBTAG00000044118	GRIP1;HELB;FAU;IRAK3;gene_source;ensembl;LLPH;5S_rRNA;HMGA2	0
5_48690001_48750000	5	48690001	48750000	59999	6.5	9	4	0.688998	1.4072	MSRB3	ENSBTAG00000044017	ENSBTAG00000044017	MSRB3	0
7_44250001_44400000	7	44250001	44400000	149999	8.5	1	16	0.780953	0.952281	.	.	ENSBTAG00000045589	ENSBTAG00000045589	64560
X_142520001_142690000	X	142520001	142690000	169999	10.5	6	15	0.733432	1.01875	ENSBTAG00000047462;ENSBTAG00000048172	ENSBTAG00000047462;ENSBTAG00000048172	ENSBTAG00000048172;ENSBTAG00000047462	ENSBTAG00000048172;ENSBTAG00000047462	0
8_53470001_53640000	8	53470001	53640000	169999	11.5	15	8	0.623391	1.24354	ENSBTAG00000047788	ENSBTAG00000047788	ENSBTAG00000047788	ENSBTAG00000047788	0
X_143940001_143990000	X	143940001	143990000	49999	12.5	3	22	0.749271	0.840813	ENSBTAG00000047774	ENSBTAG00000047774	ENSBTAG00000047774	ENSBTAG00000047774	0
5_48840001_48900000	5	48840001	48900000	59999	13	23	3	0.56846	1.6903	LEMD3	ENSBTAG00000039435	ENSBTAG00000039435	LEMD3	0
X_143080001_143370000	X	143080001	143370000	289999	14	5	23	0.734387	0.829835	ENSBTAG00000046518;DDX3Y;UTY	ENSBTAG00000046518;ENSBTAG00000045750;ENSBTAG00000046123	ENSBTAG00000046123;ENSBTAG00000046518;ENSBTAG00000045750	UTY;ENSBTAG00000046518;DDX3Y	0
X_58030001_58130000	X	58030001	58130000	99999	14.5	10	19	0.682333	0.924435	.	.	ENSBTAG00000043053	U6	18485
13_5380001_5570000	13	5380001	5570000	189999	16	11	21	0.677814	0.900739	SRY	ENSBTAG00000047779	ENSBTAG00000047779	SRY	0
17_35690001_35720000	17	35690001	35720000	29999	18.5	24	13	0.563323	1.06568	.	.	ENSBTAG00000046302	ENSBTAG00000046302	48716
18_39710001_39740000	18	39710001	39740000	29999	18.5	20	17	0.593415	0.945735	ENSBTAG00000032018	ENSBTAG00000032018	ENSBTAG00000032018	ENSBTAG00000032018	0
17_35960001_36000000	17	35960001	36000000	39999	19.5	37	2	0.517977	1.7124	.	.	ENSBTAG00000035606	ENSBTAG00000035606	34532
X_144100001_144200000	X	144100001	144200000	99999	21	2	40	0.778069	0.629389	ENSBTAG00000045544	ENSBTAG00000045544	ENSBTAG00000045544	ENSBTAG00000045544	0
22_39780001_39810000	22	39780001	39810000	29999	23	4	42	0.73989	0.592499	PTPRG	ENSBTAG00000021911	ENSBTAG00000021911	PTPRG	0
X_143730001_143820000	X	143730001	143820000	89999	25	19	31	0.59473	0.765292	U6;U6;;ENSBTAG00000048102	ENSBTAG00000046483;ENSBTAG00000047469;ENSBTAG00000048102	ENSBTAG00000048102;ENSBTAG00000046483;ENSBTAG00000047469	ENSBTAG00000048102l;U6;U6	0
12_33760001_33800000	12	33760001	33800000	39999	26.5	46	7	0.487235	1.2583	ENSBTAG00000019529	ENSBTAG00000019529	ENSBTAG00000019529	ENSBTAG00000019529	0
12_28950001_29050000	12	28950001	29050000	99999	29	29	29	0.545201	0.789223	FRY	ENSBTAG00000006771	ENSBTAG00000006771	FRY	0
4_103910001_103940000	4	103910001	103940000	29999	29.5	49	10	0.472244	1.11404	HIPK2	ENSBTAG00000017860	ENSBTAG00000017860	HIPK2	0
8_32610001_32700000	8	32610001	32700000	89999	30.5	33	28	0.534898	0.802255	.	.	ENSBTAG00000042462	U6	420782
6_33720001_33760000	6	33720001	33760000	39999	31.5	43	20	0.497436	0.917401	.	.	ENSBTAG00000042132	U6	58552
5_22520001_22590000	5	22520001	22590000	69999	32.5	30	35	0.544962	0.708689	.	.	ENSBTAG00000033594	C12orf74	129223
19_28480001_28510000	19	28480001	28510000	29999	33.5	12	55	0.664238	0.365472	CTC1;PFAS	ENSBTAG00000007117;ENSBTAG00000031509	ENSBTAG00000007117;ENSBTAG00000031509	CTC1;PFAS	0
X_58190001_58230000	X	58190001	58230000	39999	33.5	7	60	0.72195	0.298803	.	.	ENSBTAG00000032806	ENSBTAG00000032806	12198
6_73460001_73490000	6	73460001	73490000	29999	34	14	54	0.624534	0.376153	PPAT;ENSBTAG00000010577	ENSBTAG00000010571;ENSBTAG00000010577	ENSBTAG00000010571;ENSBTAG00000010577	PPAT;ENSBTAG00000010577	0
2_63270001_63290000	2	63270001	63290000	19999	34.5	64	5	0.420446	1.38515	MGAT5	ENSBTAG00000018744	ENSBTAG00000018744	MGAT5	0
22_39870001_39900000	22	39870001	39900000	29999	34.5	16	53	0.61179	0.378501	PTPRG	ENSBTAG00000021911	ENSBTAG00000021911	PTPRG	0
16_48870001_48890000	16	48870001	48890000	19999	36	47	25	0.484115	0.815828	.	.	ENSBTAG00000047285	ENSBTAG00000047285	320977
5_90010001_90040000	5	90010001	90040000	29999	37	65	9	0.41434	1.17727	.	.	ENSBTAG00000044467	ENSBTAG00000044467	72820
6_33550001_33660000	6	33550001	33660000	109999	37	22	52	0.581856	0.396923	.	.	ENSBTAG00000047821	ENSBTAG00000047821	76628
12_29650001_29690000	12	29650001	29690000	39999	37	63	11	0.423551	1.07832	bta-mir-2299;B3GLCT	ENSBTAG00000044236;ENSBTAG00000033412	ENSBTAG00000044236;ENSBTAG00000033412	bta-mir-2299;B3GLCT	0
29_28520001_28550000	29	28520001	28550000	29999	37.5	57	18	0.449087	0.935016	SIAE;SPA17	ENSBTAG00000009412;ENSBTAG00000033464	ENSBTAG00000009412;ENSBTAG00000033464	SIAE;SPA17	0
2_70670001_70700000	2	70670001	70700000	29999	38	39	37	0.508298	0.678707	.	.	ENSBTAG00000021494	EN1	272738
6_53110001_53130000	6	53110001	53130000	19999	38.5	71	6	0.377842	1.34096	.	.	ENSBTAG00000000061	PCDH7	1102219
4_104140001_104170000	4	104140001	104170000	29999	39	45	33	0.490096	0.739541	TBXAS1	ENSBTAG00000020225	ENSBTAG00000020225	TBXAS1	0
6_78250001_78270000	6	78250001	78270000	19999	39.5	55	24	0.449782	0.820601	.	.	ENSBTAG00000013918	ADGRL3	721885
6_73590001_73620000	6	73590001	73620000	29999	40	44	36	0.491004	0.681891	.	.	ENSBTAG00000002330	ENSBTAG00000002330	9778
25_14580001_14600000	25	14580001	14600000	19999	40	54	26	0.462135	0.814502	ABCC6	ENSBTAG00000015191	ENSBTAG00000015191	ABCC6	0
12_24570001_24590000	12	24570001	24590000	19999	41	68	14	0.385422	1.02021	.	.	ENSBTAG00000011860	SUPT20H	78873
8_25160001_25190000	8	25160001	25190000	29999	41.5	13	70	0.642941	0.114887	SCARNA8;HAUS6	ENSBTAG00000044260;ENSBTAG00000019843	ENSBTAG00000019843;ENSBTAG00000044260	HAUS6;SCARNA8	0
10_38100001_38120000	10	38100001	38120000	19999	42	72	12	0.363778	1.07093	ENSBTAG00000039789;ENSBTAG00000003754	ENSBTAG00000039789;ENSBTAG00000003754	ENSBTAG00000039789;ENSBTAG00000003754	ENSBTAG00000039789;ENSBTAG00000003754	0
22_35200001_35230000	22	35200001	35230000	29999	42	28	56	0.555857	0.342086	SLC25A26	ENSBTAG00000037972	ENSBTAG00000037972	SLC25A26	0
18_2960001_2980000	18	2960001	2980000	19999	42.5	35	50	0.519926	0.42849	ADAT1;KARS;TERF2IP	ENSBTAG00000015669;ENSBTAG00000015677;ENSBTAG00000015686	ENSBTAG00000015669;ENSBTAG00000015677;ENSBTAG00000015686	ADAT1;KARS;TERF2IP	0
5_67880001_67900000	5	67880001	67900000	19999	43	40	46	0.504693	0.491428	ENSBTAG00000027899	ENSBTAG00000027899	ENSBTAG00000027899	ENSBTAG00000027899	0
12_37870001_37900000	12	37870001	37900000	29999	43	17	69	0.609069	0.140899	.	.	ENSBTAG00000014274	ENSBTAG00000014274	75215
19_28050001_28080000	19	28050001	28080000	29999	43.5	21	66	0.588291	0.209132	DNAH2	ENSBTAG00000008605	ENSBTAG00000008605	DNAH2	0
6_38280001_38310000	6	38280001	38310000	29999	44	25	63	0.558589	0.232909	MEPE;IBSP	ENSBTAG00000007568;ENSBTAG00000000470	ENSBTAG00000007568;ENSBTAG00000000470	MEPE;IBSP	0
8_48020001_48050000	8	48020001	48050000	29999	44	27	61	0.556419	0.2817	.	.	ENSBTAG00000005090	TMEM2	173036
7_32330001_32370000	7	32330001	32370000	39999	44.5	62	27	0.431469	0.813908	SNX2	ENSBTAG00000025358	ENSBTAG00000025358	SNX2	0
X_55790001_55840000	X	55790001	55840000	49999	44.5	38	51	0.510708	0.398861	.	.	ENSBTAG00000014670	BEX5	16791
6_90600001_90620000	6	90600001	90620000	19999	45	60	30	0.44435	0.786885	.	.	ENSBTAG00000027534	ENSBTAG00000027534	16202
7_79170001_79250000	7	79170001	79250000	79999	45	32	58	0.535238	0.318714	.	.	ENSBTAG00000047131	ENSBTAG00000047131	238956
12_38020001_38050000	12	38020001	38050000	29999	45	18	72	0.602765	-0.0158496	.	.	ENSBTAG00000014274	ENSBTAG00000014274	225215
22_40050001_40070000	22	40050001	40070000	19999	46.5	26	67	0.558529	0.165931	PTPRG	ENSBTAG00000021911	ENSBTAG00000021911	PTPRG	0
X_144750001_144770000	X	144750001	144770000	19999	46.5	34	59	0.526541	0.307613	.	.	ENSBTAG00000018112	TBL1Y	260463
2_89480001_89500000	2	89480001	89500000	19999	48.5	53	44	0.464819	0.500963	SGO2	ENSBTAG00000031579	ENSBTAG00000031579	SGO2	0
8_47460001_47480000	8	47460001	47480000	19999	49	41	57	0.500879	0.324556	.	.	ENSBTAG00000038593	ENSBTAG00000038593	89780
20_66070001_66090000	20	66070001	66090000	19999	49	51	47	0.466585	0.47499	.	.	ENSBTAG00000032442	ENSBTAG00000032442	261477
X_144410001_144430000	X	144410001	144430000	19999	49	50	48	0.46942	0.457378	.	.	ENSBTAG00000018112	TBL1Y	889
13_48730001_48770000	13	48730001	48770000	39999	49.5	61	38	0.440084	0.663323	.	.	ENSBTAG00000020465	FERMT1	64123
X_144300001_144320000	X	144300001	144320000	19999	49.5	58	41	0.447191	0.59968	.	.	ENSBTAG00000045544	ENSBTAG00000045544	65780
8_39730001_39750000	8	39730001	39750000	19999	50	36	64	0.519779	0.231026	.	.	ENSBTAG00000012047	JAK2	10271
18_14210001_14230000	18	14210001	14230000	19999	50.5	69	32	0.384654	0.741663	.	.	ENSBTAG00000015968	ACSF3	24106
21_32490001_32510000	21	32490001	32510000	19999	51	31	71	0.536531	0.0757164	SCAPER	ENSBTAG00000007382	ENSBTAG00000007382	SCAPER	0
7_47140001_47160000	7	47140001	47160000	19999	52	70	34	0.384143	0.724352	.	.	ENSBTAG00000013112	C5orf15	71929
13_41530001_41550000	13	41530001	41550000	19999	52	59	45	0.446919	0.498437	.	.	ENSBTAG00000006742	PAX1	272690
10_79160001_79180000	10	79160001	79180000	19999	52.5	66	39	0.411821	0.631229	GPHN	ENSBTAG00000004171	ENSBTAG00000004171	GPHN	0
X_74380001_74400000	X	74380001	74400000	19999	52.5	56	49	0.449339	0.436966	CHM	ENSBTAG00000009598	ENSBTAG00000009598	CHM	0
1_43720001_43750000	1	43720001	43750000	29999	55	42	68	0.499596	0.153772	CMSS1	ENSBTAG00000013663	ENSBTAG00000013663	CMSS1	0
3_76030001_76050000	3	76030001	76050000	19999	55	67	43	0.410523	0.57546	.	.	ENSBTAG00000009338	LRRC7	285258
15_44270001_44290000	15	44270001	44290000	19999	56.5	48	65	0.475099	0.213701	.	.	ENSBTAG00000001922	AKIP1	2299
1_116490001_116510000	1	116490001	116510000	19999	57	52	62	0.465866	0.260461	.	.	ENSBTAG00000004564	MBNL1	95612
Chr22_10710001_10810000	22	10710001	10810000	99999				0.0664221	2.16127	TRANK1;DCLK3	ENSBTAG00000021452;ENSBTAG00000039727
Chr22_10930001_10950000	22	10930001	10950000	19999				0.0432583	0.831582	ITGA9	ENSBTAG00000016566
