# Supplementary material for: Selection signatures in tropical cattle are enriched for promoter and coding regions and reveal missense mutations in the damage response gene HELB
Source: Genet Sel Evol. 2020 May 27;52:27. doi: 10.1186/s12711-020-00546-6 (PMC7251699; doi:10.1186/s12711-020-00546-6)
Supplement: Supplementary file 7 — Additional file 7: Table S6. African taurine versus African indicine FST and nucleotide diversity in 20-kb overlapping windows with a 10-kb step-size. [file 12711_2020_546_MOESM7_ESM.xlsx]

## Sheet: Table S6
Table S6 : African Taurine versus African Indicine Fst and Nucleotide diversity in 20KB windows with 10KB overlap genome-wide.
Reg_id	Fst	pi
Chr10_1_20000	0.1067	0.834094
Chr10_10001_30000	0.120985	0.917476
Chr10_20001_40000	0.138265	1.1592
Chr10_30001_50000	0.134184	1.03574
Chr10_40001_60000	0.125758	0.672097
Chr10_50001_70000	0.136547	0.588516
Chr10_60001_80000	0.145784	0.625976
Chr10_70001_90000	0.12712	0.602619
Chr10_80001_100000	0.106424	0.609698
Chr10_90001_110000	0.0940065	0.717345
Chr10_100001_120000	0.0412303	0.282915
Chr10_110001_130000	0.135607	0.299963
Chr10_120001_140000	0.148944	0.36569
Chr10_130001_150000	0.152795	0.501451
Chr10_140001_160000	0.160785	0.588486
Chr10_150001_170000	0.0795611	0.738366
Chr10_160001_180000	0.0726291	0.716432
Chr10_170001_190000	0.0754381	0.502367
Chr10_180001_200000	0.0514581	0.230266
Chr10_190001_210000	0.0367286	0.204057
Chr10_200001_220000	0.0296663	0.154774
Chr10_210001_230000	0.0278848	0.179572
Chr10_220001_240000	0.0654697	0.848115
Chr10_230001_250000	0.0764383	0.80944
Chr10_240001_260000	0.0627332	0.15877
Chr10_250001_270000	0.0799924	0.249149
Chr10_260001_280000	0.0795715	0.249287
Chr10_270001_290000	0.110985	0.0183844
Chr10_280001_300000	0.171301	-0.457839
Chr10_290001_310000	0.204554	-0.73387
Chr10_300001_320000	0.137765	-0.103257
Chr10_310001_330000	0.0445664	0.375777
Chr10_320001_340000	0.0227243	0.160388
Chr10_330001_350000	0.0555786	0.293517
Chr10_340001_360000	0.107342	0.478656
Chr10_350001_370000	0.121877	0.496143
Chr10_360001_380000	0.112674	0.450599
Chr10_370001_390000	0.0993405	0.376421
Chr10_380001_400000	0.15522	0.56759
Chr10_390001_410000	0.127765	0.497349
Chr10_400001_420000	0.0696231	0.212008
Chr10_410001_430000	0.0808762	0.104784
Chr10_420001_440000	0.0805226	0.198114
Chr10_430001_450000	0.128312	0.191091
Chr10_440001_460000	0.196975	0.332441
Chr10_450001_470000	0.176902	1.08695
Chr10_460001_480000	0.132819	1.15289
Chr10_470001_490000	0.113864	0.844674
Chr10_480001_500000	0.0996134	0.689008
Chr10_490001_510000	0.116822	0.761687
Chr10_500001_520000	0.217219	0.834763
Chr10_510001_530000	0.384793	0.419703
Chr10_520001_540000	0.348774	0.476013
Chr10_530001_550000	0.212807	0.633881
Chr10_540001_560000	0.161321	0.645066
Chr10_550001_570000	0.206527	1.35921
Chr10_560001_580000	0.232851	1.42466
Chr10_570001_590000	0.162432	0.787646
Chr10_580001_600000	0.120965	0.521772
Chr10_590001_610000	0.114018	0.151645
Chr10_600001_620000	0.0960417	0.126137
Chr10_610001_630000	0.0973622	0.52721
Chr10_620001_640000	0.0983518	0.736162
Chr10_630001_650000	0.110984	0.745936
Chr10_640001_660000	0.107156	0.773533
Chr10_650001_670000	0.10066	0.658905
Chr10_660001_680000	0.14129	0.601915
Chr10_670001_690000	0.166184	0.570442
Chr10_680001_700000	0.169122	0.693674
Chr10_690001_710000	0.145851	1.05822
Chr10_700001_720000	0.129135	1.247
Chr10_710001_730000	0.16259	1.5
Chr10_720001_740000	0.184437	1.57775
Chr10_730001_750000	0.139616	1.04113
Chr10_740001_760000	0.164162	1.00517
Chr10_750001_770000	0.213008	1.37997
Chr10_760001_780000	0.206133	1.08944
Chr10_770001_790000	0.187151	0.639849
Chr10_780001_800000	0.18863	0.584464
Chr10_790001_810000	0.239236	0.424527
Chr10_800001_820000	0.170247	0.194322
Chr10_810001_830000	0.172518	0.641786
Chr10_820001_840000	0.237828	1.08248
Chr10_830001_850000	0.238873	0.925311
Chr10_840001_860000	0.211453	0.638131
Chr10_850001_870000	0.223882	0.52423
Chr10_860001_880000	0.23099	0.712196
Chr10_870001_890000	0.169149	0.731977
Chr10_880001_900000	0.206829	0.738106
Chr10_890001_910000	0.268095	0.878903
Chr10_900001_920000	0.276663	1.42065
Chr10_910001_930000	0.244252	1.59875
Chr10_920001_940000	0.19677	1.38441
Chr10_930001_950000	0.212445	1.15648
Chr10_940001_960000	0.248579	0.583767
Chr10_950001_970000	0.244358	0.609383
Chr10_960001_980000	0.282106	1.39399
Chr10_970001_990000	0.277117	1.84493
Chr10_980001_1000000	0.242483	2.07776
Chr10_990001_1010000	0.218562	2.43033
Chr10_1000001_1020000	0.200123	2.38299
Chr10_1010001_1030000	0.219601	2.01311
Chr10_1020001_1040000	0.256389	1.72244
Chr10_1030001_1050000	0.278168	1.67744
Chr10_1040001_1060000	0.259243	0.829759
Chr10_1050001_1070000	0.212863	0.40028
Chr10_1060001_1080000	0.19612	0.597806
Chr10_1070001_1090000	0.197878	0.645233
Chr10_1080001_1100000	0.230845	0.721857
Chr10_1090001_1110000	0.274226	1.1557
Chr10_1100001_1120000	0.218493	1.03213
Chr10_1110001_1130000	0.185397	0.548727
Chr10_1120001_1140000	0.306512	1.0337
Chr10_1130001_1150000	0.398653	1.98318
Chr10_1140001_1160000	0.405336	2.45514
Chr10_1150001_1170000	0.309289	2.14359
Chr10_1160001_1180000	0.312182	2.12938
Chr10_1170001_1190000	0.289676	1.99909
Chr10_1180001_1200000	0.188051	1.33768
Chr10_1190001_1210000	0.200912	1.09665
Chr10_1200001_1220000	0.24275	1.10983
Chr10_1210001_1230000	0.337864	1.14211
Chr10_1220001_1240000	0.401844	1.31957
Chr10_1230001_1250000	0.363445	2.04117
Chr10_1240001_1260000	0.291649	2.59735
Chr10_1250001_1270000	0.244025	2.33201
Chr10_1260001_1280000	0.181304	1.61987
Chr10_1270001_1290000	0.223049	1.71807
Chr10_1280001_1300000	0.282253	1.92891
Chr10_1290001_1310000	0.272075	1.88295
Chr10_1300001_1320000	0.29212	1.89066
Chr10_1310001_1330000	0.254126	1.3093
Chr10_1320001_1340000	0.143671	1.01373
Chr10_1330001_1350000	0.130788	0.87687
Chr10_1340001_1360000	0.174509	0.829612
Chr10_1350001_1370000	0.180768	1.16219
Chr10_1360001_1380000	0.146473	1.61
Chr10_1370001_1390000	0.122762	0.65954
Chr10_1380001_1400000	0.115598	0.622251
Chr10_1390001_1410000	0.177779	1.40976
Chr10_1400001_1420000	0.178511	1.43498
Chr10_1410001_1430000	0.197163	1.73611
Chr10_1420001_1440000	0.263662	1.8484
Chr10_1430001_1450000	0.27507	1.74327
Chr10_1440001_1460000	0.205426	1.46964
Chr10_1450001_1470000	0.234603	0.972491
Chr10_1460001_1480000	0.311092	0.506593
Chr10_1470001_1490000	0.286306	-0.00357573
Chr10_1480001_1500000	0.261166	0.173668
Chr10_1490001_1510000	0.273848	0.138883
Chr10_1500001_1520000	0.267304	0.154727
Chr10_1510001_1530000	0.2256	0.165382
Chr10_1520001_1540000	0.265788	0.232675
Chr10_1530001_1550000	0.302871	0.551934
Chr10_1540001_1560000	0.230337	1.40184
Chr10_1550001_1570000	0.265985	1.95463
Chr10_1560001_1580000	0.35555	1.85825
Chr10_1570001_1590000	0.373437	1.14371
Chr10_1580001_1600000	0.387832	0.930333
Chr10_1590001_1610000	0.463392	0.849066
Chr10_1600001_1620000	0.362785	0.711007
Chr10_1610001_1630000	0.24898	0.877767
Chr10_1620001_1640000	0.250791	1.24896
Chr10_1630001_1650000	0.257182	1.51568
Chr10_1640001_1660000	0.247009	1.21274
Chr10_1650001_1670000	0.20839	0.656984
Chr10_1660001_1680000	0.194286	0.742599
Chr10_1670001_1690000	0.196314	0.920748
Chr10_1680001_1700000	0.262805	1.51709
Chr10_1690001_1710000	0.315583	2.0321
Chr10_1700001_1720000	0.27431	1.83958
Chr10_1710001_1730000	0.12673	1.30371
Chr10_1720001_1740000	0.0852585	0.76892
Chr10_1730001_1750000	0.132643	0.408515
Chr10_1740001_1760000	0.250365	-0.238935
Chr10_1750001_1770000	0.232669	-0.11055
Chr10_1760001_1780000	0.164233	0.669516
Chr10_1770001_1790000	0.190703	1.21923
Chr10_1780001_1800000	0.246124	0.960928
Chr10_1790001_1810000	0.258094	0.792949
Chr10_1800001_1820000	0.254239	1.41119
Chr10_1810001_1830000	0.307384	1.6251
Chr10_1820001_1840000	0.328663	1.76489
Chr10_1830001_1850000	0.227958	1.15753
Chr10_1840001_1860000	0.166154	0.417006
Chr10_1850001_1870000	0.189586	0.298349
Chr10_1860001_1880000	0.190526	0.267352
Chr10_1870001_1890000	0.207918	0.4303
Chr10_1880001_1900000	0.275505	0.817824
Chr10_1890001_1910000	0.363467	1.48211
Chr10_1900001_1920000	0.247751	0.533132
Chr10_1910001_1930000	0.147827	0.225961
Chr10_1920001_1940000	0.194782	0.897237
Chr10_1930001_1950000	0.254025	1.03955
Chr10_1940001_1960000	0.232835	0.531476
Chr10_1950001_1970000	0.211968	0.290585
Chr10_1960001_1980000	0.245124	0.571991
Chr10_1970001_1990000	0.272445	0.705507
Chr10_1980001_2000000	0.23757	0.129853
Chr10_1990001_2010000	0.23734	-0.165317
Chr10_2000001_2020000	0.218726	0.0859366
Chr10_2010001_2030000	0.191576	0.501062
Chr10_2020001_2040000	0.217101	0.463312
Chr10_2030001_2050000	0.278036	1.03318
Chr10_2040001_2060000	0.298517	1.71442
Chr10_2050001_2070000	0.225023	1.54168
Chr10_2060001_2080000	0.153366	0.794225
Chr10_2070001_2090000	0.20702	0.51449
Chr10_2080001_2100000	0.221805	0.486911
Chr10_2090001_2110000	0.165695	0.21564
Chr10_2100001_2120000	0.161287	0.0974781
Chr10_2110001_2130000	0.194362	0.233335
Chr10_2120001_2140000	0.287395	0.98954
Chr10_2130001_2150000	0.30593	1.95917
Chr10_2140001_2160000	0.311795	2.10993
Chr10_2150001_2170000	0.361124	1.45874
Chr10_2160001_2180000	0.289935	1.52725
Chr10_2170001_2190000	0.193044	2.08811
Chr10_2180001_2200000	0.15992	1.61883
Chr10_2190001_2210000	0.150204	1.30643
Chr10_2200001_2220000	0.123544	1.87098
Chr10_2210001_2230000	0.177562	2.12417
Chr10_2220001_2240000	0.205656	1.4582
Chr10_2230001_2250000	0.227854	0.952609
Chr10_2240001_2260000	0.256294	0.832007
Chr10_2250001_2270000	0.189018	0.788079
Chr10_2260001_2280000	0.138326	1.0764
Chr10_2270001_2290000	0.192336	1.68971
Chr10_2280001_2300000	0.16923	1.28222
Chr10_2290001_2310000	0.119912	0.694444
Chr10_2300001_2320000	0.098133	0.522696
Chr10_2310001_2330000	0.0720154	0.394904
Chr10_2320001_2340000	0.0708279	0.223903
Chr10_2330001_2350000	0.0770152	0.121582
Chr10_2340001_2360000	0.0748128	0.0600653
Chr10_2350001_2370000	0.102408	0.281193
Chr10_2360001_2380000	0.143836	0.871954
Chr10_2370001_2390000	0.129595	1.06897
Chr10_2380001_2400000	0.123943	0.98899
Chr10_2390001_2410000	0.129388	0.899445
Chr10_2400001_2420000	0.0897544	0.560949
Chr10_2410001_2430000	0.0782528	0.162112
Chr10_2420001_2440000	0.0794247	0.243155
Chr10_2430001_2450000	0.107923	0.487761
Chr10_2440001_2460000	0.144621	0.807255
Chr10_2450001_2470000	0.128726	1.13259
Chr10_2460001_2480000	0.15702	1.13068
Chr10_2470001_2490000	0.226762	1.29509
Chr10_2480001_2500000	0.266434	1.35575
Chr10_2490001_2510000	0.273233	1.31823
Chr10_2500001_2520000	0.346723	1.61548
Chr10_2510001_2530000	0.260368	1.57086
Chr10_2520001_2540000	0.120913	0.789344
Chr10_2530001_2550000	0.122791	-0.0455465
Chr10_2540001_2560000	0.290246	-0.419236
Chr10_2550001_2570000	0.39881	-0.485481
Chr10_2560001_2580000	0.416559	-0.240674
Chr10_2570001_2590000	0.365849	0.152641
Chr10_2580001_2600000	0.300234	0.261114
Chr10_2590001_2610000	0.251624	0.374594
Chr10_2600001_2620000	0.221521	0.811101
Chr10_2610001_2630000	0.180796	0.967666
Chr10_2620001_2640000	0.142856	0.849067
Chr10_2630001_2650000	0.103354	1.22658
Chr10_2640001_2660000	0.0941343	1.03008
Chr10_2650001_2670000	0.111079	1.123
Chr10_2660001_2680000	0.214397	1.66492
Chr10_2670001_2690000	0.19709	1.44162
Chr10_2680001_2700000	0.15393	0.905121
Chr10_2690001_2710000	0.181764	0.77864
Chr10_2700001_2720000	0.219384	1.14992
Chr10_2710001_2730000	0.199111	1.51537
Chr10_2720001_2740000	0.128874	1.18306
Chr10_2730001_2750000	0.101517	0.629363
Chr10_2740001_2760000	0.10872	0.451641
Chr10_2750001_2770000	0.0930207	0.494807
Chr10_2760001_2780000	0.0558498	0.742361
Chr10_2770001_2790000	0.044925	0.68398
Chr10_2780001_2800000	0.0592739	0.422603
Chr10_2790001_2810000	0.0936862	0.539157
Chr10_2800001_2820000	0.14042	1.07952
Chr10_2810001_2830000	0.132545	0.781482
Chr10_2820001_2840000	0.098915	0.378012
Chr10_2830001_2850000	0.0794928	0.256908
Chr10_2840001_2860000	0.0691958	0.210007
Chr10_2850001_2870000	0.095588	0.336797
Chr10_2860001_2880000	0.103272	0.386692
Chr10_2870001_2890000	0.0794543	0.331481
Chr10_2880001_2900000	0.0825707	0.531551
Chr10_2890001_2910000	0.0715291	0.770866
Chr10_2900001_2920000	0.0663957	0.983995
Chr10_2910001_2930000	0.120373	1.30469
Chr10_2920001_2940000	0.188309	1.25091
Chr10_2930001_2950000	0.183616	1.18366
Chr10_2940001_2960000	0.154986	1.40941
Chr10_2950001_2970000	0.114486	0.96904
Chr10_2960001_2980000	0.0760279	0.313856
Chr10_2970001_2990000	0.0469267	0.0865833
Chr10_2980001_3000000	0.0464892	0.380418
Chr10_2990001_3010000	0.0595815	0.447396
Chr10_3000001_3020000	0.0476885	0.217378
Chr10_3010001_3030000	0.034245	0.193012
Chr10_3020001_3040000	0.0496285	0.376664
Chr10_3030001_3050000	0.10054	0.886666
Chr10_3040001_3060000	0.125822	1.29655
Chr10_3050001_3070000	0.130467	1.37787
Chr10_3060001_3080000	0.10818	1.2008
Chr10_3070001_3090000	0.128041	1.23601
Chr10_3080001_3100000	0.170292	2.14049
Chr10_3090001_3110000	0.132959	2.18477
Chr10_3100001_3120000	0.0851007	1.62503
Chr10_3110001_3130000	0.0993546	1.11411
Chr10_3120001_3140000	0.0915751	0.606355
Chr10_3130001_3150000	0.0808593	0.408206
Chr10_3140001_3160000	0.0626103	-0.0083273
Chr10_3150001_3170000	0.0393869	-0.0150734
Chr10_3160001_3180000	0.0366888	0.354303
Chr10_3170001_3190000	0.0411915	0.402195
Chr10_3180001_3200000	0.0353845	0.506958
Chr10_3190001_3210000	0.028746	0.42793
Chr10_3200001_3220000	0.021124	0.233471
Chr10_3210001_3230000	0.0323698	0.314662
Chr10_3220001_3240000	0.0383428	0.120184
Chr10_3230001_3250000	0.0299364	0.123676
Chr10_3240001_3260000	0.0330829	0.324727
Chr10_3250001_3270000	0.0564956	0.186461
Chr10_3260001_3280000	0.0755545	0.180834
Chr10_3270001_3290000	0.10563	0.260686
Chr10_3280001_3300000	0.104786	0.324823
Chr10_3290001_3310000	0.117513	0.128542
Chr10_3300001_3320000	0.117558	0.108032
Chr10_3310001_3330000	0.0671316	0.240393
Chr10_3320001_3340000	0.0648389	0.284616
Chr10_3330001_3350000	0.0767132	0.47763
Chr10_3340001_3360000	0.118677	0.636037
Chr10_3350001_3370000	0.119487	0.608203
Chr10_3360001_3380000	0.127159	0.854974
Chr10_3370001_3390000	0.165031	1.4232
Chr10_3380001_3400000	0.167615	1.45128
Chr10_3390001_3410000	0.160626	1.10572
Chr10_3400001_3420000	0.124249	0.885736
Chr10_3410001_3430000	0.0841744	0.696512
Chr10_3420001_3440000	0.0907274	0.409474
Chr10_3430001_3450000	0.102843	-0.0297657
Chr10_3440001_3460000	0.11647	0.186748
Chr10_3450001_3470000	0.151172	0.987028
Chr10_3460001_3480000	0.179265	1.62901
Chr10_3470001_3490000	0.163464	1.14998
Chr10_3480001_3500000	0.144818	0.358444
Chr10_3490001_3510000	0.110858	0.258918
Chr10_3500001_3520000	0.096772	0.411955
Chr10_3510001_3530000	0.126703	0.385104
Chr10_3520001_3540000	0.142011	0.721338
Chr10_3530001_3550000	0.126344	0.741299
Chr10_3540001_3560000	0.171271	0.835474
Chr10_3550001_3570000	0.271173	1.29524
Chr10_3560001_3580000	0.209201	1.02637
Chr10_3570001_3590000	0.142658	0.577547
Chr10_3580001_3600000	0.136729	0.637563
Chr10_3590001_3610000	0.18337	1.12332
Chr10_3600001_3620000	0.166112	0.797967
Chr10_3610001_3630000	0.127541	0.360025
Chr10_3620001_3640000	0.181833	0.636821
Chr10_3630001_3650000	0.180399	0.655622
Chr10_3640001_3660000	0.168945	0.602949
Chr10_3650001_3670000	0.179825	0.501365
Chr10_3660001_3680000	0.199222	0.23246
Chr10_3670001_3690000	0.1772	0.232911
Chr10_3680001_3700000	0.141592	0.467696
Chr10_3690001_3710000	0.111103	0.513592
Chr10_3700001_3720000	0.104618	0.307275
Chr10_3710001_3730000	0.124729	0.36738
Chr10_3720001_3740000	0.0992728	0.528899
Chr10_3730001_3750000	0.141126	0.879475
Chr10_3740001_3760000	0.171192	0.967121
Chr10_3750001_3770000	0.106875	0.29375
Chr10_3760001_3780000	0.0946838	0.0117401
Chr10_3770001_3790000	0.20493	0.0743656
Chr10_3780001_3800000	0.340887	0.70788
Chr10_3790001_3810000	0.329768	1.05139
Chr10_3800001_3820000	0.2447	0.509096
Chr10_3810001_3830000	0.192728	0.313933
Chr10_3820001_3840000	0.163015	1.00929
Chr10_3830001_3850000	0.17049	1.79607
Chr10_3840001_3860000	0.178158	1.44747
Chr10_3850001_3870000	0.151408	0.648544
Chr10_3860001_3880000	0.156547	0.423448
Chr10_3870001_3890000	0.189599	0.566175
Chr10_3880001_3900000	0.194322	0.721723
Chr10_3890001_3910000	0.120879	0.701103
Chr10_3900001_3920000	0.0661428	0.167338
Chr10_3910001_3930000	0.13902	0.653799
Chr10_3920001_3940000	0.200271	1.31531
Chr10_3930001_3950000	0.17988	0.874694
Chr10_3940001_3960000	0.113985	0.416785
Chr10_3950001_3970000	0.108407	0.488044
Chr10_3960001_3980000	0.063512	0.270503
Chr10_3970001_3990000	0.0413859	0.0678818
Chr10_3980001_4000000	0.0334642	0.072042
Chr10_3990001_4010000	0.0301795	0.309267
Chr10_4000001_4020000	0.0172398	0.484314
Chr10_4010001_4030000	0.0160764	0.361911
Chr10_4020001_4040000	0.0165733	0.193102
Chr10_4030001_4050000	0.0235848	0.327838
Chr10_4040001_4060000	0.0500794	0.518828
Chr10_4050001_4070000	0.0827085	0.251633
Chr10_4060001_4080000	0.130137	0.326982
Chr10_4070001_4090000	0.166281	0.668404
Chr10_4080001_4100000	0.125903	0.845294
Chr10_4090001_4110000	0.0616658	1.06816
Chr10_4100001_4120000	0.0393828	0.936779
Chr10_4110001_4130000	0.0995938	1.07877
Chr10_4120001_4140000	0.135158	1.17163
Chr10_4130001_4150000	0.134929	0.884609
Chr10_4140001_4160000	0.153311	0.286063
Chr10_4150001_4170000	0.162509	0.188122
Chr10_4160001_4180000	0.153847	0.108471
Chr10_4170001_4190000	0.128427	0.155647
Chr10_4180001_4200000	0.143929	0.400504
Chr10_4190001_4210000	0.153194	0.391017
Chr10_4200001_4220000	0.145862	0.688301
Chr10_4210001_4230000	0.219401	1.03628
Chr10_4220001_4240000	0.27436	1.27565
Chr10_4230001_4250000	0.26234	1.47201
Chr10_4240001_4260000	0.248927	1.4851
Chr10_4250001_4270000	0.187438	1.04897
Chr10_4260001_4280000	0.107384	0.527004
Chr10_4270001_4290000	0.0940266	0.741542
Chr10_4280001_4300000	0.150401	1.37209
Chr10_4290001_4310000	0.211865	1.28551
Chr10_4300001_4320000	0.24594	1.14806
Chr10_4310001_4330000	0.296533	1.22339
Chr10_4320001_4340000	0.280715	1.03338
Chr10_4330001_4350000	0.160501	0.457806
Chr10_4340001_4360000	0.110764	0.381935
Chr10_4350001_4370000	0.0683267	0.380211
Chr10_4360001_4380000	0.0646129	0.521482
Chr10_4370001_4390000	0.101183	0.828538
Chr10_4380001_4400000	0.106257	0.656621
Chr10_4390001_4410000	0.0847358	0.454173
Chr10_4400001_4420000	0.0591647	0.397888
Chr10_4410001_4430000	0.0740901	0.397023
Chr10_4420001_4440000	0.0816463	0.495799
Chr10_4430001_4450000	0.0853362	0.437123
Chr10_4440001_4460000	0.0791982	0.140664
Chr10_4450001_4470000	0.109583	0.288199
Chr10_4460001_4480000	0.151914	0.622844
Chr10_4470001_4490000	0.156818	0.872544
Chr10_4480001_4500000	0.156419	0.910262
Chr10_4490001_4510000	0.129928	0.59866
Chr10_4500001_4520000	0.145398	0.296452
Chr10_4510001_4530000	0.200885	0.336993
Chr10_4520001_4540000	0.137632	0.131292
Chr10_4530001_4550000	0.0451962	-0.202268
Chr10_4540001_4560000	0.0420154	-0.102275
Chr10_4550001_4570000	0.102256	0.575374
Chr10_4560001_4580000	0.160397	0.307779
Chr10_4570001_4590000	0.199099	0.110474
Chr10_4580001_4600000	0.182051	0.0753286
Chr10_4590001_4610000	0.142176	0.200925
Chr10_4600001_4620000	0.17127	0.381721
Chr10_4610001_4630000	0.153656	0.489605
Chr10_4620001_4640000	0.078162	0.614016
Chr10_4630001_4650000	0.0691758	0.559594
Chr10_4640001_4660000	0.136386	0.507462
Chr10_4650001_4670000	0.108144	0.465035
Chr10_4660001_4680000	0.0761487	0.4564
Chr10_4670001_4690000	0.106601	0.660557
Chr10_4680001_4700000	0.099085	0.60815
Chr10_4690001_4710000	0.0723847	0.349051
Chr10_4700001_4720000	0.0629415	0.249714
Chr10_4710001_4730000	0.096155	0.315431
Chr10_4720001_4740000	0.121096	0.481987
Chr10_4730001_4750000	0.131117	0.398191
Chr10_4740001_4760000	0.135429	0.212835
Chr10_4750001_4770000	0.138289	0.277192
Chr10_4760001_4780000	0.164284	0.562312
Chr10_4770001_4790000	0.171457	0.906597
Chr10_4780001_4800000	0.132688	1.06784
Chr10_4790001_4810000	0.0797382	0.326591
Chr10_4800001_4820000	0.100568	0.392166
Chr10_4810001_4830000	0.120467	0.640151
Chr10_4820001_4840000	0.126496	0.571533
Chr10_4830001_4850000	0.116337	0.512648
Chr10_4840001_4860000	0.0898426	0.416905
Chr10_4850001_4870000	0.0688982	0.335569
Chr10_4860001_4880000	0.0681982	0.370955
Chr10_4870001_4890000	0.0697878	0.210009
Chr10_4880001_4900000	0.0668874	0.201395
Chr10_4890001_4910000	0.0666925	0.432244
Chr10_4900001_4920000	0.0676746	0.576522
Chr10_4910001_4930000	0.0682625	0.57083
Chr10_4920001_4940000	0.0545068	0.546475
Chr10_4930001_4950000	0.0367518	0.394048
Chr10_4940001_4960000	0.0921398	0.492015
Chr10_4950001_4970000	0.157653	0.956405
Chr10_4960001_4980000	0.114564	0.692745
Chr10_4970001_4990000	0.0631749	0.408097
Chr10_4980001_5000000	0.0303297	0.259913
Chr10_4990001_5010000	0.0392988	0.230647
Chr10_5000001_5020000	0.0752364	0.406297
Chr10_5010001_5030000	0.100479	0.594665
Chr10_5020001_5040000	0.107919	0.628964
Chr10_5030001_5050000	0.0922727	0.543593
Chr10_5040001_5060000	0.0924565	0.904301
Chr10_5050001_5070000	0.101792	0.678032
Chr10_5060001_5080000	0.0717216	0.137532
Chr10_5070001_5090000	0.0947259	0.431043
Chr10_5080001_5100000	0.166675	0.469904
Chr10_5090001_5110000	0.161219	0.181251
Chr10_5100001_5120000	0.209792	0.329893
Chr10_5110001_5130000	0.22446	0.408849
Chr10_5120001_5140000	0.155623	0.452043
Chr10_5130001_5150000	0.108812	0.351107
Chr10_5140001_5160000	0.0936949	0.379722
Chr10_5150001_5170000	0.162743	0.403743
Chr10_5160001_5180000	0.161737	0.359408
Chr10_5170001_5190000	0.111143	0.401603
Chr10_5180001_5200000	0.105798	0.320954
Chr10_5190001_5210000	0.129314	0.328515
Chr10_5200001_5220000	0.154613	0.385431
Chr10_5210001_5230000	0.158181	0.345206
Chr10_5220001_5240000	0.130216	0.645697
Chr10_5230001_5250000	0.130167	0.646442
Chr10_5240001_5260000	0.109043	0.429007
Chr10_5250001_5270000	0.0920066	0.462966
Chr10_5260001_5280000	0.0776175	0.477587
Chr10_5270001_5290000	0.126165	0.520118
Chr10_5280001_5300000	0.138339	0.749247
Chr10_5290001_5310000	0.0911862	0.877104
Chr10_5300001_5320000	0.0952457	0.767492
Chr10_5310001_5330000	0.0761031	0.600106
Chr10_5320001_5340000	0.0676885	0.134849
Chr10_5330001_5350000	0.111643	0.282101
Chr10_5340001_5360000	0.109855	0.374354
Chr10_5350001_5370000	0.106328	0.389558
Chr10_5360001_5380000	0.136991	0.566337
Chr10_5370001_5390000	0.142833	0.328267
Chr10_5380001_5400000	0.0811797	0.194802
Chr10_5390001_5410000	0.0809119	0.122195
Chr10_5400001_5420000	0.105353	0.363903
Chr10_5410001_5430000	0.103558	0.336013
Chr10_5420001_5440000	0.129705	0.0605689
Chr10_5430001_5450000	0.121974	0.0940334
Chr10_5440001_5460000	0.133515	0.344766
Chr10_5450001_5470000	0.168059	0.117265
Chr10_5460001_5480000	0.124015	-0.0282182
Chr10_5470001_5490000	0.120354	0.247557
Chr10_5480001_5500000	0.243224	0.715539
Chr10_5490001_5510000	0.287359	0.812113
Chr10_5500001_5520000	0.205061	0.349139
Chr10_5510001_5530000	0.181032	0.698682
Chr10_5520001_5540000	0.157346	1.31849
Chr10_5530001_5550000	0.0996471	1.2185
Chr10_5540001_5560000	0.0835693	0.729552
Chr10_5550001_5570000	0.131878	0.51371
Chr10_5560001_5580000	0.148962	0.502146
Chr10_5570001_5590000	0.0836548	0.406278
Chr10_5580001_5600000	0.0686506	0.572162
Chr10_5590001_5610000	0.0778709	0.288393
Chr10_5600001_5620000	0.0712011	0.13615
Chr10_5610001_5630000	0.0853747	0.461911
Chr10_5620001_5640000	0.0725709	0.429867
Chr10_5630001_5650000	0.0638542	0.445619
Chr10_5640001_5660000	0.0628338	0.424075
Chr10_5650001_5670000	0.0289753	0.209744
Chr10_5660001_5680000	0.0402724	0.109937
Chr10_5670001_5690000	0.0587421	0.126651
Chr10_5680001_5700000	0.0410662	0.298858
Chr10_5690001_5710000	0.10402	1.35715
Chr10_5700001_5720000	0.117183	1.9416
Chr10_5710001_5730000	0.0845141	1.74757
Chr10_5720001_5740000	0.0765606	0.392058
Chr10_5730001_5750000	0.105346	0.253495
Chr10_5740001_5760000	0.125195	0.119859
Chr10_5750001_5770000	0.112534	-0.0226108
Chr10_5760001_5780000	0.0875251	0.40969
Chr10_5770001_5790000	0.107879	0.484676
Chr10_5780001_5800000	0.145375	0.248307
Chr10_5790001_5810000	0.117964	0.261874
Chr10_5800001_5820000	0.089629	0.300365
Chr10_5810001_5830000	0.05437	0.43036
Chr10_5820001_5840000	0.0556562	0.502385
Chr10_5830001_5850000	0.0557636	0.542409
Chr10_5840001_5860000	0.039042	0.307346
Chr10_5850001_5870000	0.0167792	0.0171292
Chr10_5860001_5880000	0.0189915	0.163281
Chr10_5870001_5890000	0.0407796	0.414619
Chr10_5880001_5900000	0.0446291	0.492589
Chr10_5890001_5910000	0.0321634	0.389809
Chr10_5900001_5920000	0.048894	0.166906
Chr10_5910001_5930000	0.05696	0.11999
Chr10_5920001_5940000	0.0513474	0.213901
Chr10_5930001_5950000	0.0639324	0.337072
Chr10_5940001_5960000	0.0792527	0.489531
Chr10_5950001_5970000	0.102184	0.581228
Chr10_5960001_5980000	0.201829	1.25414
Chr10_5970001_5990000	0.232433	2.53286
Chr10_5980001_6000000	0.25301	2.20481
Chr10_5990001_6010000	0.342345	2.15551
Chr10_6000001_6020000	0.314215	1.83322
Chr10_6010001_6030000	0.215114	1.93212
Chr10_6020001_6040000	0.180625	1.64399
Chr10_6030001_6050000	0.20293	1.12219
Chr10_6040001_6060000	0.157412	0.80749
Chr10_6050001_6070000	0.190324	0.476743
Chr10_6060001_6080000	0.208149	0.532162
Chr10_6070001_6090000	0.232333	0.467975
Chr10_6080001_6100000	0.275046	0.412499
Chr10_6090001_6110000	0.262094	0.726553
Chr10_6100001_6120000	0.174451	0.681762
Chr10_6110001_6130000	0.137854	0.543174
Chr10_6120001_6140000	0.180056	0.477846
Chr10_6130001_6150000	0.234633	0.86782
Chr10_6140001_6160000	0.312206	1.65416
Chr10_6150001_6170000	0.271548	2.21065
Chr10_6160001_6180000	0.220936	2.44317
Chr10_6170001_6190000	0.210229	2.54948
Chr10_6180001_6200000	0.188765	1.84478
Chr10_6190001_6210000	0.160806	1.11923
Chr10_6200001_6220000	0.172506	0.907941
Chr10_6210001_6230000	0.212765	0.838231
Chr10_6220001_6240000	0.179107	0.610849
Chr10_6230001_6250000	0.188662	0.672997
Chr10_6240001_6260000	0.187434	0.772366
Chr10_6250001_6270000	0.130098	0.65156
Chr10_6260001_6280000	0.129223	0.433367
Chr10_6270001_6290000	0.161955	0.717447
Chr10_6280001_6300000	0.207471	1.43246
Chr10_6290001_6310000	0.189514	1.36175
Chr10_6300001_6320000	0.123696	0.619767
Chr10_6310001_6330000	0.137678	0.5439
Chr10_6320001_6340000	0.154743	0.595797
Chr10_6330001_6350000	0.158923	0.76926
Chr10_6340001_6360000	0.22013	0.889839
Chr10_6350001_6370000	0.216759	0.724304
Chr10_6360001_6380000	0.162849	0.937803
Chr10_6370001_6390000	0.14466	1.17503
Chr10_6380001_6400000	0.14821	1.28979
Chr10_6390001_6410000	0.10682	0.694604
Chr10_6400001_6420000	0.106797	0.434276
Chr10_6410001_6430000	0.171683	0.750887
Chr10_6420001_6440000	0.185869	1.13124
Chr10_6430001_6450000	0.19836	1.62673
Chr10_6440001_6460000	0.230139	1.80688
Chr10_6450001_6470000	0.192034	1.7002
Chr10_6460001_6480000	0.130785	1.6888
Chr10_6470001_6490000	0.131875	1.63197
Chr10_6480001_6500000	0.187778	2.06682
Chr10_6490001_6510000	0.187233	2.74798
Chr10_6500001_6520000	0.143945	2.49311
Chr10_6510001_6530000	0.123985	1.86214
Chr10_6520001_6540000	0.112595	1.86918
Chr10_6530001_6550000	0.12322	1.54962
Chr10_6540001_6560000	0.106799	1.77843
Chr10_6550001_6570000	0.0908988	2.09656
Chr10_6560001_6580000	0.0898228	1.97889
Chr10_6570001_6590000	0.0791468	1.6069
Chr10_6580001_6600000	0.0623196	0.940645
Chr10_6590001_6610000	0.0929471	0.853194
Chr10_6600001_6620000	0.122187	0.926681
Chr10_6610001_6630000	0.122197	1.30688
Chr10_6620001_6640000	0.0990931	0.82644
Chr10_6630001_6650000	0.0813974	0.436498
Chr10_6640001_6660000	0.0924908	0.56519
Chr10_6650001_6670000	0.106511	0.577553
Chr10_6660001_6680000	0.0955714	0.445157
Chr10_6670001_6690000	0.0853056	0.179011
Chr10_6680001_6700000	0.0698141	0.122562
Chr10_6690001_6710000	0.0160039	0.152736
Chr10_6700001_6720000	0.0169568	0.121691
Chr10_6710001_6730000	0.0210055	0.107177
Chr10_6720001_6740000	0.0271032	0.119567
Chr10_6730001_6750000	0.0445303	0.198411
Chr10_6740001_6760000	0.0510025	0.203083
Chr10_6750001_6770000	0.0497827	0.244883
Chr10_6760001_6780000	0.0449901	0.21237
Chr10_6770001_6790000	0.0530536	0.0414201
Chr10_6780001_6800000	0.0300905	0.0326963
Chr10_6790001_6810000	0.0145616	0.061899
Chr10_6800001_6820000	0.0174093	0.0846501
Chr10_6810001_6830000	0.00662901	0.0467048
Chr10_6820001_6840000	0.0087041	0.0410417
Chr10_6830001_6850000	0.0238786	0.067132
Chr10_6840001_6860000	0.0373462	0.0869367
Chr10_6850001_6870000	0.0616325	0.0327804
Chr10_6860001_6880000	0.154005	-0.150395
Chr10_6870001_6890000	0.156918	0.0298536
Chr10_6880001_6900000	0.0952872	0.263189
Chr10_6890001_6910000	0.104238	0.0777926
Chr10_6900001_6920000	0.159784	0.223822
Chr10_6910001_6930000	0.138033	0.617826
Chr10_6920001_6940000	0.098754	0.99989
Chr10_6930001_6950000	0.137192	1.93492
Chr10_6940001_6960000	0.15168	2.21738
Chr10_6950001_6970000	0.134146	1.97547
Chr10_6960001_6980000	0.134043	2.10194
Chr10_6970001_6990000	0.104441	1.47348
Chr10_6980001_7000000	0.109531	0.8484
Chr10_6990001_7010000	0.139433	0.623061
Chr10_7000001_7020000	0.145415	0.511996
Chr10_7010001_7030000	0.147058	0.300292
Chr10_7020001_7040000	0.133494	0.590274
Chr10_7030001_7050000	0.125674	1.15209
Chr10_7040001_7060000	0.13075	0.641694
Chr10_7050001_7070000	0.129966	0.640508
Chr10_7060001_7080000	0.122058	0.780098
Chr10_7070001_7090000	0.104473	0.907289
Chr10_7080001_7100000	0.0791184	0.801517
Chr10_7090001_7110000	0.086663	0.553639
Chr10_7100001_7120000	0.0847106	0.625919
Chr10_7110001_7130000	0.0728774	0.765857
Chr10_7120001_7140000	0.0718794	0.723299
Chr10_7130001_7150000	0.0684959	1.07785
Chr10_7140001_7160000	0.0708613	1.48797
Chr10_7150001_7170000	0.0799477	1.08482
Chr10_7160001_7180000	0.0629635	0.403576
Chr10_7170001_7190000	0.0374942	7.56637e-05
Chr10_7180001_7200000	0.0512285	0.342448
Chr10_7190001_7210000	0.0807923	1.50017
Chr10_7200001_7220000	0.0837337	1.5749
Chr10_7210001_7230000	0.051454	0.961039
Chr10_7220001_7240000	0.0598106	0.870148
Chr10_7230001_7250000	0.108206	0.977976
Chr10_7240001_7260000	0.106447	0.950097
Chr10_7250001_7270000	0.0809719	0.661049
Chr10_7260001_7280000	0.0506251	0.344526
Chr10_7270001_7290000	0.0440021	0.248129
Chr10_7280001_7300000	0.0556157	0.368708
Chr10_7290001_7310000	0.0556421	0.404141
Chr10_7300001_7320000	0.0805236	0.643009
Chr10_7310001_7330000	0.109466	0.911505
Chr10_7320001_7340000	0.0818271	0.578538
Chr10_7330001_7350000	0.0745261	0.313285
Chr10_7340001_7360000	0.0443592	0.138801
Chr10_7360001_7380000	0.0124579	0.168329
Chr10_7370001_7390000	0.0358445	0.154246
Chr10_7380001_7400000	0.0530356	0.287419
Chr10_7390001_7410000	0.0453869	0.2277
Chr10_7400001_7420000	0.0350212	0.158207
Chr10_7410001_7430000	0.0427417	0.192286
Chr10_7420001_7440000	0.033709	0.0319782
Chr10_7430001_7450000	0.0377893	0.0335473
Chr10_7440001_7460000	0.0606579	0.240727
Chr10_7450001_7470000	0.0577369	0.522755
Chr10_7460001_7480000	0.0431302	0.390096
Chr10_7470001_7490000	0.0368915	0.0337245
Chr10_7480001_7500000	0.0318985	0.0986708
Chr10_7490001_7510000	0.0657935	0.468822
Chr10_7500001_7520000	0.141438	0.99053
Chr10_7510001_7530000	0.173909	0.917001
Chr10_7520001_7540000	0.154486	1.1059
Chr10_7530001_7550000	0.151221	1.29884
Chr10_7540001_7560000	0.176924	1.08708
Chr10_7550001_7570000	0.132518	1.4069
Chr10_7560001_7580000	0.098002	1.38857
Chr10_7570001_7590000	0.125277	1.53252
Chr10_7580001_7600000	0.132602	0.755381
Chr10_7590001_7610000	0.11511	0.559298
Chr10_7600001_7620000	0.137592	1.42885
Chr10_7610001_7630000	0.127218	1.23029
Chr10_7620001_7640000	0.097823	1.04814
Chr10_7630001_7650000	0.0765049	1.05978
Chr10_7640001_7660000	0.0823933	0.412537
Chr10_7650001_7670000	0.092536	0.676453
Chr10_7660001_7680000	0.10163	1.57091
Chr10_7670001_7690000	0.0986861	1.40549
Chr10_7680001_7700000	0.117762	1.46383
Chr10_7690001_7710000	0.163368	1.45869
Chr10_7700001_7720000	0.108594	0.992471
Chr10_7710001_7730000	0.0516883	0.800172
Chr10_7720001_7740000	0.0701091	1.40165
Chr10_7730001_7750000	0.0720347	1.62803
Chr10_7740001_7760000	0.133859	1.60425
Chr10_7750001_7770000	0.167698	1.04105
Chr10_7760001_7780000	0.116703	0.536518
Chr10_7770001_7790000	0.127589	0.460749
Chr10_7780001_7800000	0.221662	0.890496
Chr10_7790001_7810000	0.214606	1.12234
Chr10_7800001_7820000	0.163956	1.26688
Chr10_7810001_7830000	0.147557	0.907283
Chr10_7820001_7840000	0.124193	0.416657
Chr10_7830001_7850000	0.038516	0.0221748
Chr10_7840001_7860000	0.0322149	0.0193891
Chr10_7850001_7870000	0.16155	0.505071
Chr10_7860001_7880000	0.289356	0.994541
Chr10_7870001_7890000	0.209753	0.882409
Chr10_7880001_7900000	0.147847	0.560458
Chr10_7890001_7910000	0.166797	0.470957
Chr10_7900001_7920000	0.126911	0.423547
Chr10_7910001_7930000	0.0969952	0.356254
Chr10_7920001_7940000	0.144891	0.179073
Chr10_7930001_7950000	0.176328	0.0453737
Chr10_7940001_7960000	0.199169	0.555937
Chr10_7950001_7970000	0.282937	1.79556
Chr10_7960001_7980000	0.260601	1.9741
Chr10_7970001_7990000	0.202497	1.77407
Chr10_7980001_8000000	0.197586	1.09667
Chr10_7990001_8010000	0.169683	1.15642
Chr10_8000001_8020000	0.21351	1.86608
Chr10_8010001_8030000	0.200817	1.68033
Chr10_8020001_8040000	0.12241	1.52949
Chr10_8030001_8050000	0.158848	1.93001
Chr10_8040001_8060000	0.217798	1.99083
Chr10_8050001_8070000	0.169004	1.71249
Chr10_8060001_8080000	0.154516	1.19331
Chr10_8070001_8090000	0.149892	0.764508
Chr10_8080001_8100000	0.129995	0.729877
Chr10_8090001_8110000	0.162107	1.48808
Chr10_8100001_8120000	0.179579	1.65114
Chr10_8110001_8130000	0.315055	0.800979
Chr10_8120001_8140000	0.355937	0.643529
Chr10_8130001_8150000	0.216312	0.682975
Chr10_8140001_8160000	0.157635	0.980646
Chr10_8150001_8170000	0.154622	1.31371
Chr10_8160001_8180000	0.140718	1.61994
Chr10_8170001_8190000	0.221708	1.86238
Chr10_8180001_8200000	0.330722	1.84731
Chr10_8190001_8210000	0.250686	1.85092
Chr10_8200001_8220000	0.209552	2.04177
Chr10_8210001_8230000	0.246386	2.13398
Chr10_8220001_8240000	0.227303	1.56319
Chr10_8230001_8250000	0.204228	0.914506
Chr10_8240001_8260000	0.172654	0.441448
Chr10_8250001_8270000	0.156773	0.126057
Chr10_8260001_8280000	0.1578	0.388543
Chr10_8270001_8290000	0.171187	1.38199
Chr10_8280001_8300000	0.147308	0.52196
Chr10_8290001_8310000	0.116445	0.0817831
Chr10_8300001_8320000	0.0935469	0.392681
Chr10_8310001_8330000	0.0967733	0.460448
Chr10_8320001_8340000	0.174277	0.834068
Chr10_8330001_8350000	0.24219	1.54759
Chr10_8340001_8360000	0.246976	1.62404
Chr10_8350001_8370000	0.203803	0.938121
Chr10_8360001_8380000	0.171856	0.425591
Chr10_8370001_8390000	0.216672	0.796192
Chr10_8380001_8400000	0.257373	1.82906
Chr10_8390001_8410000	0.245188	1.7896
Chr10_8400001_8420000	0.198866	1.2695
Chr10_8410001_8430000	0.21137	1.21387
Chr10_8420001_8440000	0.260253	0.920371
Chr10_8430001_8450000	0.241284	0.826654
Chr10_8440001_8460000	0.195609	1.71318
Chr10_8450001_8470000	0.126397	0.721162
Chr10_8460001_8480000	0.152251	0.796878
Chr10_8470001_8490000	0.203084	1.13226
Chr10_8480001_8500000	0.164639	0.767129
Chr10_8490001_8510000	0.144698	1.07701
Chr10_8500001_8520000	0.173813	1.91041
Chr10_8510001_8530000	0.209051	2.30265
Chr10_8520001_8540000	0.211236	2.30809
Chr10_8530001_8550000	0.17116	2.30416
Chr10_8540001_8560000	0.13938	1.10434
Chr10_8550001_8570000	0.0920128	0.474486
Chr10_8560001_8580000	0.0923524	0.373021
Chr10_8570001_8590000	0.135733	1.00479
Chr10_8580001_8600000	0.182899	1.89114
Chr10_8590001_8610000	0.187507	1.5338
Chr10_8600001_8620000	0.183288	1.34953
Chr10_8610001_8630000	0.192795	1.03138
Chr10_8620001_8640000	0.139779	0.475153
Chr10_8630001_8650000	0.0849277	0.216367
Chr10_8640001_8660000	0.138748	0.469417
Chr10_8650001_8670000	0.173113	0.930853
Chr10_8660001_8680000	0.128606	0.920983
Chr10_8670001_8690000	0.0942308	0.742438
Chr10_8680001_8700000	0.170221	1.50435
Chr10_8690001_8710000	0.165681	2.04748
Chr10_8700001_8720000	0.160143	1.63817
Chr10_8710001_8730000	0.243155	1.90503
Chr10_8720001_8740000	0.278086	2.83826
Chr10_8770001_8790000	0.0785919	1.41741
Chr10_8780001_8800000	0.0524357	0.992276
Chr10_8790001_8810000	0.11044	1.30494
Chr10_8800001_8820000	0.190475	0.967363
Chr10_8810001_8830000	0.18447	0.956626
Chr10_8820001_8840000	0.183717	1.17377
Chr10_8830001_8850000	0.140497	0.454425
Chr10_8840001_8860000	0.136228	0.617623
Chr10_8850001_8870000	0.129717	1.33162
Chr10_8860001_8880000	0.114156	0.983076
Chr10_8870001_8890000	0.135683	0.878946
Chr10_8880001_8900000	0.136689	0.845057
Chr10_8890001_8910000	0.129069	0.729698
Chr10_8900001_8920000	0.105864	0.575154
Chr10_8910001_8930000	0.111902	0.751547
Chr10_8920001_8940000	0.164904	1.45513
Chr10_8930001_8950000	0.235741	2.37319
Chr10_8940001_8960000	0.262918	2.70444
Chr10_8950001_8970000	0.22385	2.79135
Chr10_8960001_8980000	0.170641	2.27544
Chr10_8970001_8990000	0.117979	1.89102
Chr10_8980001_9000000	0.203307	2.29672
Chr10_8990001_9010000	0.234004	2.76901
Chr10_9000001_9020000	0.217095	2.67464
Chr10_9010001_9030000	0.173382	1.89027
Chr10_9020001_9040000	0.0954242	0.739769
Chr10_9030001_9050000	0.114281	0.228178
Chr10_9040001_9060000	0.192396	0.0301345
Chr10_9050001_9070000	0.244337	0.400496
Chr10_9060001_9080000	0.331235	1.489
Chr10_9070001_9090000	0.351797	1.19533
Chr10_9080001_9100000	0.234317	0.231917
Chr10_9090001_9110000	0.184326	0.195839
Chr10_9100001_9120000	0.154166	0.404905
Chr10_9110001_9130000	0.140965	0.45756
Chr10_9120001_9140000	0.123098	0.560586
Chr10_9130001_9150000	0.0966079	0.572876
Chr10_9140001_9160000	0.115353	0.2012
Chr10_9150001_9170000	0.206795	0.666724
Chr10_9160001_9180000	0.262799	1.82226
Chr10_9170001_9190000	0.247793	1.95016
Chr10_9180001_9200000	0.208711	1.36301
Chr10_9190001_9210000	0.221379	1.07767
Chr10_9200001_9220000	0.262209	1.64568
Chr10_9210001_9230000	0.23443	1.28377
Chr10_9220001_9240000	0.181502	0.790092
Chr10_9230001_9250000	0.113482	0.598695
Chr10_9240001_9260000	0.153318	0.158542
Chr10_9250001_9270000	0.198428	0.0209468
Chr10_9260001_9280000	0.214562	0.303994
Chr10_9270001_9290000	0.189683	0.705618
Chr10_9280001_9300000	0.111497	0.519277
Chr10_9290001_9310000	0.143234	0.767728
Chr10_9300001_9320000	0.210767	1.37035
Chr10_9310001_9330000	0.210827	1.14473
Chr10_9320001_9340000	0.209472	1.49012
Chr10_9330001_9350000	0.197106	1.69012
Chr10_9340001_9360000	0.222765	1.86241
Chr10_9350001_9370000	0.222466	1.75684
Chr10_9360001_9380000	0.177038	1.77066
Chr10_9370001_9390000	0.178656	0.813086
Chr10_9380001_9400000	0.19781	0.369655
Chr10_9390001_9410000	0.16225	0.751869
Chr10_9400001_9420000	0.152285	1.40483
Chr10_9410001_9430000	0.181625	1.63992
Chr10_9420001_9440000	0.177058	1.61976
Chr10_9430001_9450000	0.15754	1.44953
Chr10_9440001_9460000	0.138354	1.08463
Chr10_9450001_9470000	0.110112	1.05457
Chr10_9460001_9480000	0.101142	1.11365
Chr10_9470001_9490000	0.124509	1.0182
Chr10_9480001_9500000	0.146272	0.897608
Chr10_9490001_9510000	0.111218	0.703062
Chr10_9500001_9520000	0.158297	0.536008
Chr10_9510001_9530000	0.14749	0.513625
Chr10_9520001_9540000	0.0855928	0.490914
Chr10_9530001_9550000	0.0997226	0.492976
Chr10_9540001_9560000	0.19005	0.713816
Chr10_9550001_9570000	0.178104	0.874908
Chr10_9560001_9580000	0.135379	1.29412
Chr10_9570001_9590000	0.138036	1.7168
Chr10_9580001_9600000	0.164533	1.62521
Chr10_9590001_9610000	0.139257	1.84128
Chr10_9600001_9620000	0.185777	1.88078
Chr10_9610001_9630000	0.220351	1.81958
Chr10_9620001_9640000	0.152677	1.84482
Chr10_9630001_9650000	0.135548	1.80761
Chr10_9640001_9660000	0.126971	1.43903
Chr10_9650001_9670000	0.113098	0.313366
Chr10_9660001_9680000	0.0877574	-0.133897
Chr10_9670001_9690000	0.109771	0.525352
Chr10_9680001_9700000	0.124892	0.95943
Chr10_9690001_9710000	0.15086	1.502
Chr10_9700001_9720000	0.155893	1.38837
Chr10_9710001_9730000	0.132273	1.56324
Chr10_9720001_9740000	0.144425	0.952026
Chr10_9730001_9750000	0.126121	0.0195218
Chr10_9740001_9760000	0.12716	-0.0969686
Chr10_9750001_9770000	0.163487	0.13753
Chr10_9760001_9780000	0.160653	0.219333
Chr10_9770001_9790000	0.148438	0.299661
Chr10_9780001_9800000	0.15837	0.682632
Chr10_9790001_9810000	0.188659	1.52182
Chr10_9800001_9820000	0.185591	1.22304
Chr10_9810001_9830000	0.0998858	0.661441
Chr10_9820001_9840000	0.115003	0.859556
Chr10_9830001_9850000	0.207781	1.17607
Chr10_9840001_9860000	0.190374	0.604751
Chr10_9850001_9870000	0.168421	0.288034
Chr10_9860001_9880000	0.170946	0.226132
Chr10_9870001_9890000	0.194706	0.354822
Chr10_9880001_9900000	0.269245	0.947966
Chr10_9890001_9910000	0.280981	0.960456
Chr10_9900001_9920000	0.270424	0.622243
Chr10_9910001_9930000	0.248904	0.597814
Chr10_9920001_9940000	0.153193	1.23997
Chr10_9930001_9950000	0.122596	1.24323
Chr10_9940001_9960000	0.162579	-0.184053
Chr10_9950001_9970000	0.144299	-0.410037
Chr10_9960001_9980000	0.151065	-0.249478
Chr10_9970001_9990000	0.173905	0.188811
Chr10_9980001_10000000	0.180381	0.529577
Chr10_9990001_10010000	0.188466	0.753679
Chr10_10000001_10020000	0.157544	1.15909
Chr10_10010001_10030000	0.171605	1.39161
Chr10_10020001_10040000	0.221557	1.9503
Chr10_10030001_10050000	0.248384	1.78742
Chr10_10040001_10060000	0.22473	0.566713
Chr10_10050001_10070000	0.274684	0.742989
Chr10_10060001_10080000	0.324872	1.01336
Chr10_10070001_10090000	0.175951	0.481758
Chr10_10080001_10100000	0.118686	0.159977
Chr10_10090001_10110000	0.172748	0.0709275
Chr10_10100001_10120000	0.285421	0.359927
Chr10_10110001_10130000	0.288826	0.623333
Chr10_10120001_10140000	0.15477	0.614715
Chr10_10130001_10150000	0.0406644	0.25007
Chr10_10140001_10160000	0.0650295	0.111671
Chr10_10150001_10170000	0.10683	0.296589
Chr10_10160001_10180000	0.175619	0.849144
Chr10_10170001_10190000	0.212762	0.69948
Chr10_10180001_10200000	0.22878	0.562114
Chr10_10190001_10210000	0.195051	0.504892
Chr10_10200001_10220000	0.121817	-0.00200986
Chr10_10210001_10230000	0.169494	0.147858
Chr10_10220001_10240000	0.197567	0.198145
Chr10_10230001_10250000	0.215725	0.138497
Chr10_10240001_10260000	0.264913	0.435208
Chr10_10250001_10270000	0.215582	0.502727
Chr10_10260001_10280000	0.153148	0.247141
Chr10_10270001_10290000	0.208726	0.10159
Chr10_10280001_10300000	0.179489	0.12526
Chr10_10290001_10310000	0.190107	0.28064
Chr10_10300001_10320000	0.195171	0.425529
Chr10_10310001_10330000	0.212831	0.772978
Chr10_10320001_10340000	0.297733	0.818446
Chr10_10330001_10350000	0.285252	1.04763
Chr10_10340001_10360000	0.228021	0.830615
Chr10_10350001_10370000	0.211529	0.622676
Chr10_10360001_10380000	0.225706	1.26472
Chr10_10370001_10390000	0.268282	1.76274
Chr10_10380001_10400000	0.264184	0.974207
Chr10_10390001_10410000	0.221968	0.713716
Chr10_10400001_10420000	0.191372	0.914738
Chr10_10410001_10430000	0.162576	1.0302
Chr10_10420001_10440000	0.217446	1.26657
Chr10_10430001_10450000	0.25852	1.55873
Chr10_10440001_10460000	0.247157	1.7144
Chr10_10450001_10470000	0.282152	1.7207
Chr10_10460001_10480000	0.290176	1.89408
Chr10_10470001_10490000	0.26319	2.25551
Chr10_10510001_10530000	0.136116	1.86247
Chr10_10520001_10540000	0.163088	1.96174
Chr10_10530001_10550000	0.188495	2.86837
Chr10_10540001_10560000	0.164747	2.669
Chr10_10580001_10600000	0.139938	1.79345
Chr10_10590001_10610000	0.168638	1.21596
Chr10_10600001_10620000	0.127508	0.855333
Chr10_10610001_10630000	0.106933	0.702679
Chr10_10620001_10640000	0.0891279	0.44946
Chr10_10630001_10650000	0.0793661	0.244275
Chr10_10640001_10660000	0.0986225	0.280163
Chr10_10650001_10670000	0.113901	0.370174
Chr10_10660001_10680000	0.129242	0.613542
Chr10_10670001_10690000	0.124117	0.589911
Chr10_10680001_10700000	0.107386	0.338453
Chr10_10690001_10710000	0.0639138	0.150075
Chr10_10700001_10720000	0.101324	0.517363
Chr10_10710001_10730000	0.150413	0.849316
Chr10_10720001_10740000	0.137587	0.943882
Chr10_10730001_10750000	0.105986	1.2192
Chr10_10740001_10760000	0.160895	1.6176
Chr10_10750001_10770000	0.222913	1.24799
Chr10_10760001_10780000	0.17815	0.693241
Chr10_10770001_10790000	0.171895	0.475891
Chr10_10780001_10800000	0.237713	0.25937
Chr10_10790001_10810000	0.249518	0.110392
Chr10_10800001_10820000	0.14815	-0.0603866
Chr10_10810001_10830000	0.114538	-0.0230425
Chr10_10820001_10840000	0.168179	0.0571775
Chr10_10830001_10850000	0.200068	0.131186
Chr10_10840001_10860000	0.213033	0.781019
Chr10_10850001_10870000	0.200557	0.982866
Chr10_10860001_10880000	0.178563	0.941299
Chr10_10870001_10890000	0.180661	1.1841
Chr10_10880001_10900000	0.183801	0.848219
Chr10_10890001_10910000	0.140492	-0.23966
Chr10_10900001_10920000	0.0929601	-0.367069
Chr10_10910001_10930000	0.134191	0.283918
Chr10_10920001_10940000	0.150765	0.582593
Chr10_10930001_10950000	0.0960054	0.57908
Chr10_10940001_10960000	0.0847233	1.30694
Chr10_10950001_10970000	0.0833342	1.36658
Chr10_10960001_10980000	0.0941144	0.939481
Chr10_10970001_10990000	0.106425	1.10115
Chr10_10980001_11000000	0.109645	0.832983
Chr10_10990001_11010000	0.0830938	0.280429
Chr10_11000001_11020000	0.0718036	0.176854
Chr10_11010001_11030000	0.0786377	0.241097
Chr10_11020001_11040000	0.050725	0.241723
Chr10_11030001_11050000	0.057314	0.39655
Chr10_11040001_11060000	0.09807	0.624084
Chr10_11050001_11070000	0.0900665	0.477518
Chr10_11060001_11080000	0.0584159	0.301663
Chr10_11070001_11090000	0.0755808	0.622294
Chr10_11080001_11100000	0.11206	0.877847
Chr10_11090001_11110000	0.176991	0.90696
Chr10_11100001_11120000	0.231266	1.25201
Chr10_11110001_11130000	0.178786	1.20474
Chr10_11120001_11140000	0.143353	0.818536
Chr10_11130001_11150000	0.16492	0.746657
Chr10_11140001_11160000	0.171488	1.22651
Chr10_11150001_11170000	0.153296	1.6833
Chr10_11160001_11180000	0.121289	0.751775
Chr10_11170001_11190000	0.120146	0.587588
Chr10_11180001_11200000	0.148978	1.01226
Chr10_11190001_11210000	0.132891	0.947963
Chr10_11200001_11220000	0.108398	0.546277
Chr10_11210001_11230000	0.136641	0.338672
Chr10_11220001_11240000	0.151037	0.341062
Chr10_11230001_11250000	0.131731	0.399927
Chr10_11240001_11260000	0.0944915	0.491519
Chr10_11250001_11270000	0.104865	0.970068
Chr10_11260001_11280000	0.112726	1.77713
Chr10_11270001_11290000	0.130079	1.92406
Chr10_11280001_11300000	0.16193	1.88547
Chr10_11290001_11310000	0.14462	1.84825
Chr10_11300001_11320000	0.156453	1.82352
Chr10_11310001_11330000	0.147164	1.81385
Chr10_11320001_11340000	0.127517	1.56825
Chr10_11330001_11350000	0.130973	1.38441
Chr10_11340001_11360000	0.140935	1.39087
Chr10_11350001_11370000	0.167811	1.38552
Chr10_11360001_11380000	0.194092	1.52216
Chr10_11370001_11390000	0.187926	1.75784
Chr10_11380001_11400000	0.167354	1.35374
Chr10_11390001_11410000	0.173287	1.14983
Chr10_11400001_11420000	0.163178	1.59709
Chr10_11410001_11430000	0.194179	1.85496
Chr10_11420001_11440000	0.240351	1.72405
Chr10_11430001_11450000	0.234153	1.04831
Chr10_11440001_11460000	0.159934	0.551041
Chr10_11450001_11470000	0.143989	0.508262
Chr10_11460001_11480000	0.156887	0.643258
Chr10_11470001_11490000	0.1384	0.753395
Chr10_11480001_11500000	0.175436	1.12651
Chr10_11490001_11510000	0.205986	1.00818
Chr10_11500001_11520000	0.18348	0.696792
Chr10_11510001_11530000	0.16808	0.701517
Chr10_11520001_11540000	0.12197	0.320163
Chr10_11530001_11550000	0.0805369	0.0424834
Chr10_11540001_11560000	0.102302	0.223933
Chr10_11550001_11570000	0.13339	0.556964
Chr10_11560001_11580000	0.131571	0.637331
Chr10_11570001_11590000	0.115021	0.509134
Chr10_11580001_11600000	0.0893482	0.306174
Chr10_11590001_11610000	0.12652	0.870638
Chr10_11600001_11620000	0.190834	1.51884
Chr10_11610001_11630000	0.201866	0.997981
Chr10_11620001_11640000	0.204359	0.407185
Chr10_11630001_11650000	0.19575	0.494149
Chr10_11640001_11660000	0.183268	0.331122
Chr10_11650001_11670000	0.221362	0.314386
Chr10_11660001_11680000	0.200638	0.922491
Chr10_11670001_11690000	0.159658	1.12151
Chr10_11680001_11700000	0.0966478	0.484609
Chr10_11690001_11710000	0.0967508	0.507172
Chr10_11700001_11720000	0.12749	0.638658
Chr10_11710001_11730000	0.138372	0.29933
Chr10_11720001_11740000	0.152509	0.176903
Chr10_11730001_11750000	0.145807	0.458782
Chr10_11740001_11760000	0.145576	0.649985
Chr10_11750001_11770000	0.124214	0.427962
Chr10_11760001_11780000	0.150492	0.776193
Chr10_11770001_11790000	0.225755	1.12157
Chr10_11780001_11800000	0.297676	1.28081
Chr10_11790001_11810000	0.254158	1.42493
Chr10_11800001_11820000	0.212886	1.26739
Chr10_11810001_11830000	0.181691	1.16237
Chr10_11820001_11840000	0.169706	1.09968
Chr10_11830001_11850000	0.159165	0.846625
Chr10_11840001_11860000	0.146914	0.732077
Chr10_11850001_11870000	0.153722	1.10945
Chr10_11860001_11880000	0.156262	0.949615
Chr10_11870001_11890000	0.189324	0.554154
Chr10_11880001_11900000	0.197812	0.548584
Chr10_11890001_11910000	0.193587	0.94306
Chr10_11900001_11920000	0.189532	0.611661
Chr10_11910001_11930000	0.181808	-0.160402
Chr10_11920001_11940000	0.157237	0.118303
Chr10_11930001_11950000	0.12126	0.544379
Chr10_11940001_11960000	0.112449	0.34739
Chr10_11950001_11970000	0.119326	0.275868
Chr10_11960001_11980000	0.132757	0.470745
Chr10_11970001_11990000	0.143208	0.693155
Chr10_11980001_12000000	0.163831	0.680742
Chr10_11990001_12010000	0.17564	0.900024
Chr10_12000001_12020000	0.185083	1.2933
Chr10_12010001_12030000	0.165387	1.44557
Chr10_12020001_12040000	0.175651	1.34231
Chr10_12030001_12050000	0.225087	1.39375
Chr10_12040001_12060000	0.222662	1.43006
Chr10_12050001_12070000	0.257494	1.22096
Chr10_12060001_12080000	0.273503	1.17118
Chr10_12070001_12090000	0.240054	0.796871
Chr10_12080001_12100000	0.206324	0.944522
Chr10_12090001_12110000	0.228572	1.13657
Chr10_12100001_12120000	0.191284	0.720308
Chr10_12110001_12130000	0.143707	0.926613
Chr10_12120001_12140000	0.124321	0.711384
Chr10_12130001_12150000	0.0905488	-0.116256
Chr10_12140001_12160000	0.146808	0.0653179
Chr10_12150001_12170000	0.21942	0.378755
Chr10_12160001_12180000	0.184886	0.448018
Chr10_12170001_12190000	0.204975	1.38004
Chr10_12180001_12200000	0.236383	1.6471
Chr10_12190001_12210000	0.247135	1.60337
Chr10_12200001_12220000	0.227652	1.49632
Chr10_12210001_12230000	0.224891	1.50149
Chr10_12220001_12240000	0.272983	1.60108
Chr10_12230001_12250000	0.263271	1.53334
Chr10_12240001_12260000	0.238147	1.32595
Chr10_12250001_12270000	0.312223	1.12141
Chr10_12260001_12280000	0.301974	1.50738
Chr10_12270001_12290000	0.207354	1.97899
Chr10_12280001_12300000	0.210828	1.60868
Chr10_12290001_12310000	0.200503	1.20618
Chr10_12300001_12320000	0.157631	0.985844
Chr10_12310001_12330000	0.165701	1.14885
Chr10_12320001_12340000	0.16454	1.3885
Chr10_12330001_12350000	0.15242	1.22199
Chr10_12340001_12360000	0.154053	1.23857
Chr10_12350001_12370000	0.193855	0.990186
Chr10_12360001_12380000	0.171788	0.668555
Chr10_12370001_12390000	0.136916	0.379433
Chr10_12380001_12400000	0.13128	0.207571
Chr10_12390001_12410000	0.0994736	0.335751
Chr10_12400001_12420000	0.108341	0.753568
Chr10_12410001_12430000	0.113796	1.23335
Chr10_12420001_12440000	0.126753	1.59191
Chr10_12430001_12450000	0.141684	1.72043
Chr10_12440001_12460000	0.13885	1.87624
Chr10_12450001_12470000	0.148976	1.90635
Chr10_12460001_12480000	0.152441	1.63869
Chr10_12470001_12490000	0.181457	1.97224
Chr10_12480001_12500000	0.218671	2.46459
Chr10_12490001_12510000	0.188987	1.83257
Chr10_12500001_12520000	0.193209	1.56303
Chr10_12510001_12530000	0.281077	2.45047
Chr10_12560001_12580000	0.0738945	1.90446
Chr10_12570001_12590000	0.0926931	1.86066
Chr10_12580001_12600000	0.10808	2.1223
Chr10_12590001_12610000	0.106301	2.15169
Chr10_12600001_12620000	0.0947861	1.58271
Chr10_12610001_12630000	0.102486	1.26054
Chr10_12620001_12640000	0.131326	1.83294
Chr10_12630001_12650000	0.127145	1.89732
Chr10_12640001_12660000	0.100291	1.51433
Chr10_12650001_12670000	0.115377	1.96367
Chr10_12690001_12710000	0.112201	2.13847
Chr10_12700001_12720000	0.093562	2.07812
Chr10_12710001_12730000	0.157117	1.79179
Chr10_12720001_12740000	0.189002	1.94013
Chr10_12730001_12750000	0.17643	2.22542
Chr10_12740001_12760000	0.182674	2.61078
Chr10_12750001_12770000	0.175023	2.61659
Chr10_12760001_12780000	0.190029	2.57947
Chr10_12770001_12790000	0.188576	1.80569
Chr10_12780001_12800000	0.123098	0.845373
Chr10_12790001_12810000	0.103764	0.975528
Chr10_12800001_12820000	0.133458	1.61491
Chr10_12810001_12830000	0.149507	1.77797
Chr10_12820001_12840000	0.103968	0.774165
Chr10_12830001_12850000	0.104407	-0.0193142
Chr10_12840001_12860000	0.105433	0.494651
Chr10_12850001_12870000	0.0712922	1.23308
Chr10_12860001_12880000	0.0789198	0.900497
Chr10_12870001_12890000	0.12484	0.690752
Chr10_12880001_12900000	0.154589	0.51157
Chr10_12890001_12910000	0.159751	0.318681
Chr10_12900001_12920000	0.113789	0.144907
Chr10_12910001_12930000	0.084792	0.484359
Chr10_12920001_12940000	0.12588	1.37346
Chr10_12930001_12950000	0.129496	1.20752
Chr10_12940001_12960000	0.116354	0.839149
Chr10_12950001_12970000	0.101886	1.19416
Chr10_12960001_12980000	0.104135	0.996553
Chr10_12970001_12990000	0.0834153	0.885884
Chr10_12980001_13000000	0.0797236	1.15461
Chr10_12990001_13010000	0.137315	0.999359
Chr10_13000001_13020000	0.153648	0.872079
Chr10_13010001_13030000	0.0894864	0.894608
Chr10_13020001_13040000	0.071275	0.598367
Chr10_13030001_13050000	0.0739702	0.603269
Chr10_13040001_13060000	0.0536495	0.937878
Chr10_13050001_13070000	0.040292	0.480579
Chr10_13060001_13080000	0.0854023	0.501202
Chr10_13070001_13090000	0.107155	0.797852
Chr10_13080001_13100000	0.0534168	0.881363
Chr10_13090001_13110000	0.0626587	0.537145
Chr10_13100001_13120000	0.115484	0.415924
Chr10_13110001_13130000	0.144062	0.918034
Chr10_13120001_13140000	0.163828	0.925593
Chr10_13130001_13150000	0.149501	0.537599
Chr10_13140001_13160000	0.0989578	0.443132
Chr10_13150001_13170000	0.116002	0.562886
Chr10_13160001_13180000	0.149732	1.13953
Chr10_13170001_13190000	0.11776	1.39777
Chr10_13180001_13200000	0.135828	1.23396
Chr10_13190001_13210000	0.247236	1.46776
Chr10_13200001_13220000	0.286757	0.55535
Chr10_13210001_13230000	0.227332	0.0511038
Chr10_13220001_13240000	0.220437	0.426636
Chr10_13230001_13250000	0.142142	0.307039
Chr10_13240001_13260000	0.10408	0.12087
Chr10_13250001_13270000	0.116698	-0.0599784
Chr10_13260001_13280000	0.119023	0.0506079
Chr10_13270001_13290000	0.105451	0.565331
Chr10_13280001_13300000	0.100474	0.820032
Chr10_13290001_13310000	0.113187	0.91232
Chr10_13300001_13320000	0.153005	1.12327
Chr10_13310001_13330000	0.190973	1.28177
Chr10_13320001_13340000	0.150393	1.41589
Chr10_13330001_13350000	0.151061	1.12127
Chr10_13340001_13360000	0.180878	1.04733
Chr10_13350001_13370000	0.173479	1.10296
Chr10_13360001_13380000	0.177939	1.2446
Chr10_13370001_13390000	0.143845	1.34517
Chr10_13380001_13400000	0.130296	1.32126
Chr10_13390001_13410000	0.145625	1.30313
Chr10_13400001_13420000	0.149527	1.14251
Chr10_13410001_13430000	0.142552	0.889689
Chr10_13420001_13440000	0.143361	0.760492
Chr10_13430001_13450000	0.211739	0.0934487
Chr10_13440001_13460000	0.211753	-0.165162
Chr10_13450001_13470000	0.17357	-0.0494449
Chr10_13460001_13480000	0.127346	0.203932
Chr10_13470001_13490000	0.143341	0.852978
Chr10_13480001_13500000	0.157597	1.34329
Chr10_13490001_13510000	0.151924	1.20862
Chr10_13500001_13520000	0.187511	1.01005
Chr10_13510001_13530000	0.195346	1.08868
Chr10_13520001_13540000	0.212248	1.01475
Chr10_13530001_13550000	0.265387	0.954117
Chr10_13540001_13560000	0.252401	1.04382
Chr10_13550001_13570000	0.251721	0.966718
Chr10_13560001_13580000	0.325578	0.722053
Chr10_13570001_13590000	0.316176	0.544741
Chr10_13580001_13600000	0.293075	0.547935
Chr10_13590001_13610000	0.26464	1.1655
Chr10_13600001_13620000	0.226234	1.39388
Chr10_13610001_13630000	0.234229	1.52255
Chr10_13620001_13640000	0.25566	1.3588
Chr10_13630001_13650000	0.242281	0.95888
Chr10_13640001_13660000	0.280418	0.895735
Chr10_13650001_13670000	0.250276	1.10604
Chr10_13660001_13680000	0.224462	1.46801
Chr10_13670001_13690000	0.182012	1.45559
Chr10_13680001_13700000	0.133766	1.31358
Chr10_13690001_13710000	0.175335	1.47062
Chr10_13700001_13720000	0.171909	1.67772
Chr10_13710001_13730000	0.216417	1.58638
Chr10_13720001_13740000	0.218112	1.22358
Chr10_13730001_13750000	0.10994	0.842571
Chr10_13740001_13760000	0.11125	0.942583
Chr10_13750001_13770000	0.177993	1.21362
Chr10_13760001_13780000	0.176551	1.07496
Chr10_13770001_13790000	0.112887	1.2836
Chr10_13780001_13800000	0.121367	1.3746
Chr10_13790001_13810000	0.145266	1.64254
Chr10_13800001_13820000	0.157292	1.68455
Chr10_13810001_13830000	0.172299	1.08363
Chr10_13820001_13840000	0.195867	1.15997
Chr10_13830001_13850000	0.167297	0.911367
Chr10_13840001_13860000	0.12834	0.571894
Chr10_13850001_13870000	0.142697	0.87268
Chr10_13860001_13880000	0.180496	1.28926
Chr10_13870001_13890000	0.188713	1.37579
Chr10_13880001_13900000	0.168222	1.2309
Chr10_13890001_13910000	0.157242	0.618936
Chr10_13900001_13920000	0.17424	0.404785
Chr10_13910001_13930000	0.190839	0.947976
Chr10_13920001_13940000	0.127322	1.80924
Chr10_13930001_13950000	0.0774092	1.10472
Chr10_13940001_13960000	0.0694601	0.438492
Chr10_13950001_13970000	0.0933573	0.669747
Chr10_13960001_13980000	0.113664	0.913944
Chr10_13970001_13990000	0.0969598	0.862242
Chr10_13980001_14000000	0.0872174	0.8605
Chr10_13990001_14010000	0.132968	0.76634
Chr10_14000001_14020000	0.137377	0.927191
Chr10_14010001_14030000	0.198677	1.496
Chr10_14020001_14040000	0.197408	1.48967
Chr10_14030001_14050000	0.168563	0.888352
Chr10_14040001_14060000	0.126155	0.741567
Chr10_14050001_14070000	0.0859886	1.1987
Chr10_14060001_14080000	0.0977027	1.05966
Chr10_14070001_14090000	0.118435	1.03756
Chr10_14080001_14100000	0.169621	1.25742
Chr10_14090001_14110000	0.222526	1.2085
Chr10_14100001_14120000	0.225772	1.32844
Chr10_14110001_14130000	0.286398	1.51684
Chr10_14120001_14140000	0.270501	1.64548
Chr10_14130001_14150000	0.208505	1.7572
Chr10_14140001_14160000	0.204257	1.54759
Chr10_14150001_14170000	0.13505	1.67131
Chr10_14160001_14180000	0.119332	1.41719
Chr10_14170001_14190000	0.156136	1.0136
Chr10_14180001_14200000	0.159118	0.963348
Chr10_14190001_14210000	0.152528	0.938091
Chr10_14200001_14220000	0.159274	0.942927
Chr10_14210001_14230000	0.159279	0.961922
Chr10_14220001_14240000	0.140677	1.04901
Chr10_14230001_14250000	0.106866	1.45231
Chr10_14240001_14260000	0.126402	1.77371
Chr10_14250001_14270000	0.140551	1.21417
Chr10_14260001_14280000	0.135539	0.92336
Chr10_14270001_14290000	0.152761	1.29798
Chr10_14280001_14300000	0.130747	1.46788
Chr10_14290001_14310000	0.101359	1.38543
Chr10_14300001_14320000	0.156365	1.60258
Chr10_14310001_14330000	0.18034	1.69517
Chr10_14320001_14340000	0.13822	1.50478
Chr10_14330001_14350000	0.0823834	1.3111
Chr10_14340001_14360000	0.0680065	1.18414
Chr10_14350001_14370000	0.106283	1.66586
Chr10_14360001_14380000	0.15898	2.26876
Chr10_14370001_14390000	0.139811	1.78055
Chr10_14380001_14400000	0.160974	1.32344
Chr10_14390001_14410000	0.165341	1.19873
Chr10_14400001_14420000	0.117207	1.38293
Chr10_14410001_14430000	0.133009	1.69654
Chr10_14420001_14440000	0.148517	1.88081
Chr10_14430001_14450000	0.146459	1.86319
Chr10_14440001_14460000	0.140802	1.31816
Chr10_14450001_14470000	0.157205	1.10962
Chr10_14460001_14480000	0.18499	1.61721
Chr10_14470001_14490000	0.155891	1.63906
Chr10_14480001_14500000	0.13648	1.39685
Chr10_14490001_14510000	0.131116	1.21915
Chr10_14500001_14520000	0.156999	1.66712
Chr10_14510001_14530000	0.177511	1.87606
Chr10_14520001_14540000	0.171998	1.66208
Chr10_14530001_14550000	0.132264	1.36581
Chr10_14540001_14560000	0.140654	1.02632
Chr10_14550001_14570000	0.122091	0.830916
Chr10_14560001_14580000	0.136466	0.838351
Chr10_14570001_14590000	0.164685	0.761121
Chr10_14580001_14600000	0.129751	0.129498
Chr10_14590001_14610000	0.129071	-0.030009
Chr10_14600001_14620000	0.223448	0.405911
Chr10_14610001_14630000	0.231713	1.01157
Chr10_14620001_14640000	0.205337	0.980292
Chr10_14630001_14650000	0.225567	0.896597
Chr10_14640001_14660000	0.181922	0.529249
Chr10_14650001_14670000	0.155657	0.453367
Chr10_14660001_14680000	0.132508	1.08974
Chr10_14670001_14690000	0.159747	0.848046
Chr10_14680001_14700000	0.264908	0.744254
Chr10_14690001_14710000	0.322513	1.27526
Chr10_14700001_14720000	0.281472	1.182
Chr10_14710001_14730000	0.237557	0.827481
Chr10_14720001_14740000	0.17238	0.862735
Chr10_14730001_14750000	0.209982	1.47529
Chr10_14740001_14760000	0.198697	0.6161
Chr10_14750001_14770000	0.186339	0.360709
Chr10_14760001_14780000	0.197506	0.73467
Chr10_14770001_14790000	0.181814	0.827078
Chr10_14780001_14800000	0.180884	0.884811
Chr10_14790001_14810000	0.213754	1.02036
Chr10_14800001_14820000	0.258899	1.10485
Chr10_14810001_14830000	0.224735	1.22431
Chr10_14820001_14840000	0.241908	1.43724
Chr10_14830001_14850000	0.271342	1.63186
Chr10_14840001_14860000	0.188711	1.42433
Chr10_14850001_14870000	0.185186	1.10967
Chr10_14860001_14880000	0.208763	1.00988
Chr10_14870001_14890000	0.182302	0.801441
Chr10_14880001_14900000	0.165667	0.633868
Chr10_14890001_14910000	0.160983	0.830081
Chr10_14900001_14920000	0.209031	1.27795
Chr10_14910001_14930000	0.249298	1.44439
Chr10_14920001_14940000	0.211361	1.20651
Chr10_14930001_14950000	0.25644	1.26176
Chr10_14940001_14960000	0.329449	1.13524
Chr10_14950001_14970000	0.319648	0.889327
Chr10_14960001_14980000	0.25836	0.991391
Chr10_14970001_14990000	0.243678	1.32819
Chr10_14980001_15000000	0.253963	1.36191
Chr10_14990001_15010000	0.269298	1.31285
Chr10_15000001_15020000	0.281366	1.56237
Chr10_15010001_15030000	0.275777	2.12429
Chr10_15020001_15040000	0.295662	2.41962
Chr10_15030001_15050000	0.270867	1.00627
Chr10_15040001_15060000	0.180157	-0.0558534
Chr10_15050001_15070000	0.198605	-0.0145399
Chr10_15060001_15080000	0.263018	0.608425
Chr10_15070001_15090000	0.438695	2.30319
Chr10_15080001_15100000	0.440068	1.7518
Chr10_15090001_15110000	0.354544	1.09547
Chr10_15100001_15120000	0.255996	0.890649
Chr10_15110001_15130000	0.334257	1.29883
Chr10_15120001_15140000	0.356681	1.83919
Chr10_15130001_15150000	0.241624	1.73591
Chr10_15140001_15160000	0.357373	1.7144
Chr10_15150001_15170000	0.397682	1.55359
Chr10_15160001_15180000	0.366667	1.09057
Chr10_15170001_15190000	0.477472	1.16486
Chr10_15180001_15200000	0.503622	1.52077
Chr10_15190001_15210000	0.414109	1.76741
Chr10_15200001_15220000	0.332637	0.993931
Chr10_15210001_15230000	0.327421	0.76178
Chr10_15220001_15240000	0.301742	0.636361
Chr10_15230001_15250000	0.325611	0.66692
Chr10_15240001_15260000	0.340198	1.09807
Chr10_15250001_15270000	0.391693	1.27036
Chr10_15260001_15280000	0.499545	2.31169
Chr10_15270001_15290000	0.410777	2.314
Chr10_15280001_15300000	0.327356	1.9889
Chr10_15290001_15310000	0.309775	2.15342
Chr10_15300001_15320000	0.343449	2.34934
Chr10_15310001_15330000	0.321278	1.60042
Chr10_15320001_15340000	0.349763	1.76156
Chr10_15330001_15350000	0.417822	2.4389
Chr10_15340001_15360000	0.330234	1.54178
Chr10_15350001_15370000	0.258691	1.3758
Chr10_15360001_15380000	0.3174	1.54191
Chr10_15370001_15390000	0.383595	1.77719
Chr10_15380001_15400000	0.339765	1.99459
Chr10_15390001_15410000	0.241535	1.90173
Chr10_15400001_15420000	0.208601	1.78954
Chr10_15410001_15430000	0.184338	1.78233
Chr10_15420001_15440000	0.211612	2.45613
Chr10_15430001_15450000	0.215507	2.0212
Chr10_15440001_15460000	0.151601	1.39636
Chr10_15450001_15470000	0.109151	1.64338
Chr10_15460001_15480000	0.133169	1.99565
Chr10_15470001_15490000	0.193347	1.57488
Chr10_15480001_15500000	0.251538	0.587183
Chr10_15490001_15510000	0.234429	0.430832
Chr10_15500001_15520000	0.243472	1.48175
Chr10_15510001_15530000	0.24911	0.835108
Chr10_15520001_15540000	0.235059	0.324947
Chr10_15530001_15550000	0.260189	0.683107
Chr10_15540001_15560000	0.227433	0.827125
Chr10_15550001_15570000	0.160204	0.347615
Chr10_15560001_15580000	0.209509	0.0651236
Chr10_15570001_15590000	0.237509	-0.266406
Chr10_15580001_15600000	0.237254	-0.462372
Chr10_15590001_15610000	0.289453	-0.571294
Chr10_15600001_15620000	0.244701	-0.404251
Chr10_15610001_15630000	0.181627	-0.136058
Chr10_15620001_15640000	0.281385	0.360862
Chr10_15630001_15650000	0.372	0.913504
Chr10_15640001_15660000	0.283413	0.544423
Chr10_15650001_15670000	0.349731	0.696465
Chr10_15660001_15680000	0.497192	1.67439
Chr10_15670001_15690000	0.424225	2.26112
Chr10_15680001_15700000	0.251396	2.43982
Chr10_15700001_15720000	0.204924	1.64176
Chr10_15710001_15730000	0.194606	0.447605
Chr10_15720001_15740000	0.264758	0.273372
Chr10_15730001_15750000	0.226026	0.176552
Chr10_15740001_15760000	0.171187	0.273568
Chr10_15750001_15770000	0.207787	0.731158
Chr10_15760001_15780000	0.18538	0.713407
Chr10_15770001_15790000	0.2655	0.94492
Chr10_15780001_15800000	0.371868	1.56996
Chr10_15790001_15810000	0.321811	1.15776
Chr10_15800001_15820000	0.230072	0.67672
Chr10_15810001_15830000	0.19349	0.773504
Chr10_15820001_15840000	0.218438	0.838091
Chr10_15830001_15850000	0.242717	0.852397
Chr10_15840001_15860000	0.238483	0.775103
Chr10_15850001_15870000	0.258256	0.552602
Chr10_15860001_15880000	0.361809	0.661636
Chr10_15870001_15890000	0.362737	1.71626
Chr10_15880001_15900000	0.295363	2.54596
Chr10_15890001_15910000	0.303682	2.4609
Chr10_15900001_15920000	0.282664	1.55708
Chr10_15910001_15930000	0.281841	1.0335
Chr10_15920001_15940000	0.241626	0.964535
Chr10_15930001_15950000	0.211631	0.825644
Chr10_15940001_15960000	0.221792	0.568183
Chr10_15950001_15970000	0.2636	0.623142
Chr10_15960001_15980000	0.197634	0.715591
Chr10_15970001_15990000	0.141974	0.878697
Chr10_15980001_16000000	0.1817	0.803761
Chr10_15990001_16010000	0.205836	0.883918
Chr10_16000001_16020000	0.181341	1.57128
Chr10_16010001_16030000	0.149275	1.40585
Chr10_16020001_16040000	0.143369	1.37279
Chr10_16030001_16050000	0.161331	1.50826
Chr10_16040001_16060000	0.16383	1.57951
Chr10_16050001_16070000	0.186454	1.61874
Chr10_16060001_16080000	0.195431	1.71108
Chr10_16070001_16090000	0.180184	1.74667
Chr10_16080001_16100000	0.174721	1.72647
Chr10_16090001_16110000	0.172137	2.05242
Chr10_16100001_16120000	0.15231	1.58418
Chr10_16110001_16130000	0.107139	0.63217
Chr10_16120001_16140000	0.119518	0.572162
Chr10_16130001_16150000	0.124424	0.39936
Chr10_16140001_16160000	0.0628456	0.26486
Chr10_16150001_16170000	0.0426454	0.426809
Chr10_16160001_16180000	0.171697	1.26343
Chr10_16170001_16190000	0.258803	1.34348
Chr10_16180001_16200000	0.210832	0.99388
Chr10_16190001_16210000	0.192508	1.40058
Chr10_16210001_16230000	0.19222	3.00981
Chr10_16220001_16240000	0.244148	2.09663
Chr10_16230001_16250000	0.237163	1.58956
Chr10_16240001_16260000	0.171038	1.70655
Chr10_16250001_16270000	0.183605	1.84156
Chr10_16260001_16280000	0.252708	1.9743
Chr10_16270001_16290000	0.223918	1.3684
Chr10_16280001_16300000	0.219965	0.671139
Chr10_16290001_16310000	0.217958	0.489096
Chr10_16300001_16320000	0.179044	0.403893
Chr10_16310001_16330000	0.147237	0.419933
Chr10_16320001_16340000	0.154099	0.318487
Chr10_16330001_16350000	0.158229	0.162559
Chr10_16340001_16360000	0.161347	0.574038
Chr10_16350001_16370000	0.21952	2.06306
Chr10_16360001_16380000	0.270927	3.11362
Chr10_16370001_16390000	0.269347	2.96313
Chr10_16380001_16400000	0.238057	2.82812
Chr10_16390001_16410000	0.237437	2.47944
Chr10_16400001_16420000	0.258211	2.75664
Chr10_16410001_16430000	0.23594	1.84754
Chr10_16420001_16440000	0.195821	0.58089
Chr10_16430001_16450000	0.166982	0.568439
Chr10_16440001_16460000	0.141351	0.641458
Chr10_16450001_16470000	0.167494	-0.0108072
Chr10_16460001_16480000	0.185037	0.126009
Chr10_16470001_16490000	0.16924	0.170346
Chr10_16480001_16500000	0.144518	0.305788
Chr10_16490001_16510000	0.150764	0.950153
Chr10_16500001_16520000	0.169023	1.7633
Chr10_16510001_16530000	0.131674	1.51711
Chr10_16520001_16540000	0.164716	1.81214
Chr10_16530001_16550000	0.181421	2.0776
Chr10_16540001_16560000	0.142443	1.25977
Chr10_16550001_16570000	0.143288	0.597167
Chr10_16560001_16580000	0.192279	0.900111
Chr10_16570001_16590000	0.163177	0.676083
Chr10_16580001_16600000	0.134249	0.575268
Chr10_16590001_16610000	0.182811	0.992462
Chr10_16600001_16620000	0.195458	0.579772
Chr10_16610001_16630000	0.176748	0.312756
Chr10_16620001_16640000	0.152434	0.518881
Chr10_16630001_16650000	0.179234	0.761741
Chr10_16640001_16660000	0.192052	1.40265
Chr10_16650001_16670000	0.174146	0.746026
Chr10_16660001_16680000	0.156973	0.267761
Chr10_16670001_16690000	0.20622	0.619994
Chr10_16680001_16700000	0.261371	1.22813
Chr10_16690001_16710000	0.221359	1.25583
Chr10_16700001_16720000	0.16191	0.779548
Chr10_16710001_16730000	0.210069	0.367368
Chr10_16720001_16740000	0.227592	0.0994929
Chr10_16730001_16750000	0.156583	0.351438
Chr10_16740001_16760000	0.18574	1.08766
Chr10_16750001_16770000	0.184959	1.23706
Chr10_16760001_16780000	0.129481	0.404922
Chr10_16770001_16790000	0.150286	0.412529
Chr10_16780001_16800000	0.18231	1.12393
Chr10_16790001_16810000	0.165827	1.07635
Chr10_16800001_16820000	0.212951	0.621081
Chr10_16810001_16830000	0.290731	0.605872
Chr10_16820001_16840000	0.18391	0.37017
Chr10_16830001_16850000	0.126438	0.428589
Chr10_16840001_16860000	0.163987	0.201693
Chr10_16850001_16870000	0.180183	0.268985
Chr10_16860001_16880000	0.185323	0.95904
Chr10_16870001_16890000	0.202746	0.892935
Chr10_16880001_16900000	0.213746	0.719354
Chr10_16890001_16910000	0.21796	0.461906
Chr10_16900001_16920000	0.215284	0.609122
Chr10_16910001_16930000	0.192662	0.754669
Chr10_16920001_16940000	0.179208	0.690565
Chr10_16930001_16950000	0.139368	0.200989
Chr10_16940001_16960000	0.154798	-0.0998361
Chr10_16950001_16970000	0.176091	0.0680039
Chr10_16960001_16980000	0.166502	0.123366
Chr10_16970001_16990000	0.342272	-1.36417
Chr10_16980001_17000000	0.375731	-1.16939
Chr10_16990001_17010000	0.210157	0.465513
Chr10_17000001_17020000	0.125008	1.05659
Chr10_17010001_17030000	0.197521	0.708406
Chr10_17020001_17040000	0.303384	0.428529
Chr10_17030001_17050000	0.402721	0.157956
Chr10_17040001_17060000	0.330379	0.104315
Chr10_17050001_17070000	0.245599	0.21387
Chr10_17060001_17080000	0.251994	0.38424
Chr10_17070001_17090000	0.306323	0.68421
Chr10_17080001_17100000	0.28422	0.665935
Chr10_17090001_17110000	0.247972	0.412785
Chr10_17100001_17120000	0.256416	0.218859
Chr10_17110001_17130000	0.257627	-0.0218551
Chr10_17120001_17140000	0.302415	-0.118189
Chr10_17130001_17150000	0.33178	0.19698
Chr10_17140001_17160000	0.353462	1.02567
Chr10_17150001_17170000	0.504628	0.665357
Chr10_17160001_17180000	0.542717	0.465843
Chr10_17170001_17190000	0.514621	0.440048
Chr10_17180001_17200000	0.358496	0.695382
Chr10_17190001_17210000	0.280384	1.02829
Chr10_17200001_17220000	0.306175	1.45842
Chr10_17210001_17230000	0.264101	1.55882
Chr10_17220001_17240000	0.387996	1.17048
Chr10_17230001_17250000	0.458632	1.22114
Chr10_17240001_17260000	0.319326	1.58377
Chr10_17250001_17270000	0.339895	1.59732
Chr10_17260001_17280000	0.32401	1.5952
Chr10_17270001_17290000	0.252476	1.62036
Chr10_17280001_17300000	0.268356	1.09311
Chr10_17290001_17310000	0.206154	0.413969
Chr10_17300001_17320000	0.225754	0.363973
Chr10_17310001_17330000	0.25282	0.679831
Chr10_17320001_17340000	0.317937	1.60423
Chr10_17330001_17350000	0.323657	0.588757
Chr10_17340001_17360000	0.250158	-0.12761
Chr10_17350001_17370000	0.290456	-0.274957
Chr10_17360001_17380000	0.284367	-0.53836
Chr10_17370001_17390000	0.216072	-0.021371
Chr10_17380001_17400000	0.276399	0.713874
Chr10_17390001_17410000	0.253351	-0.0261653
Chr10_17400001_17420000	0.166994	0.0150522
Chr10_17410001_17430000	0.157764	0.933639
Chr10_17420001_17440000	0.252567	0.938166
Chr10_17430001_17450000	0.252301	0.736572
Chr10_17440001_17460000	0.20289	0.801828
Chr10_17450001_17470000	0.197237	0.703658
Chr10_17460001_17480000	0.260769	0.966131
Chr10_17470001_17490000	0.340276	1.37109
Chr10_17480001_17500000	0.303824	2.0541
Chr10_17490001_17510000	0.243237	2.90635
Chr10_17500001_17520000	0.2312	2.32348
Chr10_17510001_17530000	0.237715	1.81845
Chr10_17520001_17540000	0.188602	1.73773
Chr10_17530001_17550000	0.171955	1.67017
Chr10_17540001_17560000	0.242818	1.56005
Chr10_17550001_17570000	0.234778	1.23586
Chr10_17560001_17580000	0.185384	1.12147
Chr10_17570001_17590000	0.142514	1.3789
Chr10_17580001_17600000	0.176217	1.68961
Chr10_17590001_17610000	0.354682	1.47546
Chr10_17600001_17620000	0.362454	1.53208
Chr10_17610001_17630000	0.337676	1.54851
Chr10_17620001_17640000	0.333025	1.30021
Chr10_17630001_17650000	0.321427	0.715643
Chr10_17640001_17660000	0.313675	0.554937
Chr10_17650001_17670000	0.297025	0.782523
Chr10_17660001_17680000	0.273457	0.984412
Chr10_17670001_17690000	0.279139	0.954966
Chr10_17680001_17700000	0.248041	0.537054
Chr10_17690001_17710000	0.165524	0.611534
Chr10_17700001_17720000	0.160722	1.17075
Chr10_17710001_17730000	0.204022	1.14483
Chr10_17720001_17740000	0.157713	0.453603
Chr10_17730001_17750000	0.172688	0.527037
Chr10_17740001_17760000	0.173222	1.08953
Chr10_17750001_17770000	0.147401	1.33995
Chr10_17760001_17780000	0.209706	1.40852
Chr10_17770001_17790000	0.234979	0.887368
Chr10_17780001_17800000	0.17083	0.174984
Chr10_17790001_17810000	0.131175	0.119649
Chr10_17800001_17820000	0.114403	0.251908
Chr10_17810001_17830000	0.192895	0.868183
Chr10_17820001_17840000	0.218152	1.37163
Chr10_17830001_17850000	0.200405	1.4943
Chr10_17840001_17860000	0.2229	1.6478
Chr10_17850001_17870000	0.2335	1.32655
Chr10_17860001_17880000	0.207654	0.7031
Chr10_17870001_17890000	0.156478	0.394717
Chr10_17880001_17900000	0.144728	0.557185
Chr10_17890001_17910000	0.184246	0.441398
Chr10_17900001_17920000	0.184497	0.241164
Chr10_17910001_17930000	0.173844	0.0998673
Chr10_17920001_17940000	0.179615	0.217637
Chr10_17930001_17950000	0.226925	1.34204
Chr10_17940001_17960000	0.244898	1.09928
Chr10_17950001_17970000	0.264812	0.270765
Chr10_17960001_17980000	0.29939	-0.0985281
Chr10_17970001_17990000	0.261766	-0.353541
Chr10_17980001_18000000	0.259256	-0.512306
Chr10_17990001_18010000	0.36709	0.0138145
Chr10_18000001_18020000	0.537654	1.5052
Chr10_18010001_18030000	0.575415	1.93316
Chr10_18020001_18040000	0.292497	0.144902
Chr10_18030001_18050000	0.166498	0.187158
Chr10_18040001_18060000	0.148338	0.829612
Chr10_18050001_18070000	0.179186	0.597498
Chr10_18060001_18080000	0.228641	0.731212
Chr10_18070001_18090000	0.466631	0.793929
Chr10_18080001_18100000	0.513262	1.08906
Chr10_18090001_18110000	0.362115	1.49836
Chr10_18100001_18120000	0.271507	1.62042
Chr10_18110001_18130000	0.235115	1.76962
Chr10_18120001_18140000	0.219009	1.71877
Chr10_18130001_18150000	0.196728	1.17786
Chr10_18140001_18160000	0.143132	0.615699
Chr10_18150001_18170000	0.127969	-0.102666
Chr10_18160001_18180000	0.114049	-0.187212
Chr10_18170001_18190000	0.126596	-0.0422634
Chr10_18180001_18200000	0.139082	-0.125227
Chr10_18190001_18210000	0.172923	-0.37726
Chr10_18200001_18220000	0.275711	-0.477186
Chr10_18210001_18230000	0.230149	-0.107545
Chr10_18220001_18240000	0.1891	0.227074
Chr10_18230001_18250000	0.144222	0.448648
Chr10_18240001_18260000	0.121661	0.469908
Chr10_18250001_18270000	0.134289	0.52812
Chr10_18260001_18280000	0.0896945	0.439048
Chr10_18270001_18290000	0.0909103	0.32889
Chr10_18280001_18300000	0.115796	0.245132
Chr10_18290001_18310000	0.162683	-0.00696994
Chr10_18300001_18320000	0.141261	-0.0258341
Chr10_18310001_18330000	0.111471	0.0401963
Chr10_18320001_18340000	0.129088	0.453212
Chr10_18330001_18350000	0.11252	1.07143
Chr10_18340001_18360000	0.161078	0.871547
Chr10_18350001_18370000	0.171237	0.670942
Chr10_18360001_18380000	0.160162	0.339389
Chr10_18370001_18390000	0.161142	0.121992
Chr10_18380001_18400000	0.164102	0.0857401
Chr10_18390001_18410000	0.174771	0.386082
Chr10_18400001_18420000	0.137768	0.412548
Chr10_18410001_18430000	0.176173	-0.185579
Chr10_18420001_18440000	0.152529	-0.121831
Chr10_18430001_18450000	0.103337	-0.065022
Chr10_18440001_18460000	0.124898	-0.0623937
Chr10_18450001_18470000	0.143508	0.271275
Chr10_18460001_18480000	0.132943	0.361138
Chr10_18470001_18490000	0.12692	0.532451
Chr10_18480001_18500000	0.203966	0.728192
Chr10_18490001_18510000	0.192842	0.626935
Chr10_18500001_18520000	0.136511	0.523898
Chr10_18510001_18530000	0.250693	0.809285
Chr10_18520001_18540000	0.297273	0.636737
Chr10_18530001_18550000	0.238924	-0.0234328
Chr10_18540001_18560000	0.20754	0.0724719
Chr10_18550001_18570000	0.221122	0.252186
Chr10_18560001_18580000	0.203773	0.127287
Chr10_18570001_18590000	0.18977	0.475794
Chr10_18580001_18600000	0.168038	0.525296
Chr10_18590001_18610000	0.134047	0.372681
Chr10_18600001_18620000	0.137726	0.505281
Chr10_18610001_18630000	0.169296	0.537108
Chr10_18620001_18640000	0.147214	0.298782
Chr10_18630001_18650000	0.133697	0.381533
Chr10_18640001_18660000	0.142437	0.578302
Chr10_18650001_18670000	0.100708	0.376853
Chr10_18660001_18680000	0.0768428	0.36533
Chr10_18670001_18690000	0.068112	0.354852
Chr10_18680001_18700000	0.0788206	0.196065
Chr10_18690001_18710000	0.104644	0.136544
Chr10_18700001_18720000	0.0873094	0.187871
Chr10_18710001_18730000	0.0752514	0.28978
Chr10_18720001_18740000	0.105296	0.30927
Chr10_18730001_18750000	0.132793	0.28705
Chr10_18740001_18760000	0.132544	0.263305
Chr10_18750001_18770000	0.124775	0.135554
Chr10_18760001_18780000	0.126036	0.209478
Chr10_18770001_18790000	0.119636	0.440934
Chr10_18780001_18800000	0.130516	0.239041
Chr10_18790001_18810000	0.129977	0.1363
Chr10_18800001_18820000	0.114063	0.336944
Chr10_18810001_18830000	0.104973	0.30071
Chr10_18820001_18840000	0.105522	0.28922
Chr10_18830001_18850000	0.140614	0.509035
Chr10_18840001_18860000	0.153927	0.599396
Chr10_18850001_18870000	0.128763	0.53541
Chr10_18860001_18880000	0.115269	0.451391
Chr10_18870001_18890000	0.139669	0.207051
Chr10_18880001_18900000	0.1353	-0.0330486
Chr10_18890001_18910000	0.135915	0.140882
Chr10_18900001_18920000	0.133765	0.235282
Chr10_18910001_18930000	0.11537	0.347032
Chr10_18920001_18940000	0.103137	0.110467
Chr10_18930001_18950000	0.128406	-0.0849243
Chr10_18940001_18960000	0.104422	0.0779455
Chr10_18950001_18970000	0.049395	0.207269
Chr10_18960001_18980000	0.0313705	0.200216
Chr10_18970001_18990000	0.0445982	0.311598
Chr10_18980001_19000000	0.0520137	0.354882
Chr10_18990001_19010000	0.029233	0.238798
Chr10_19000001_19020000	0.0555194	0.165837
Chr10_19010001_19030000	0.0334042	0.220462
Chr10_19020001_19040000	0.0235894	0.258454
Chr10_19030001_19050000	0.0629985	0.434495
Chr10_19040001_19060000	0.080249	0.196102
Chr10_19050001_19070000	0.0382478	-0.128297
Chr10_19060001_19080000	0.0256057	-0.0822999
Chr10_19070001_19090000	0.0607555	0.0300223
Chr10_19080001_19100000	0.0795003	0.0436603
Chr10_19090001_19110000	0.19809	-0.0703943
Chr10_19100001_19120000	0.297863	-0.23305
Chr10_19110001_19130000	0.272866	-0.0345002
Chr10_19120001_19140000	0.194862	0.0454995
Chr10_19130001_19150000	0.217653	0.0145984
Chr10_19140001_19160000	0.318634	-0.0390383
Chr10_19150001_19170000	0.296649	-0.0227474
Chr10_19160001_19180000	0.189104	0.266453
Chr10_19170001_19190000	0.161179	0.273062
Chr10_19180001_19200000	0.154799	0.116795
Chr10_19190001_19210000	0.130544	0.0734794
Chr10_19200001_19220000	0.158486	-0.00934452
Chr10_19210001_19230000	0.158934	0.0239009
Chr10_19220001_19240000	0.160535	0.0485084
Chr10_19230001_19250000	0.194496	-0.0148704
Chr10_19240001_19260000	0.152977	0.00186499
Chr10_19250001_19270000	0.133144	0.0417932
Chr10_19260001_19280000	0.14391	0.134251
Chr10_19270001_19290000	0.159845	0.131675
Chr10_19280001_19300000	0.169486	0.100545
Chr10_19290001_19310000	0.175109	0.0247649
Chr10_19300001_19320000	0.204712	-0.0783598
Chr10_19310001_19330000	0.219176	-0.197523
Chr10_19320001_19340000	0.246967	-0.181476
Chr10_19330001_19350000	0.272802	-0.103705
Chr10_19340001_19360000	0.285281	-0.133983
Chr10_19350001_19370000	0.203361	-0.0773276
Chr10_19360001_19380000	0.181488	-0.0747452
Chr10_19370001_19390000	0.274426	-0.0522069
Chr10_19380001_19400000	0.261829	-0.00157461
Chr10_19390001_19410000	0.285896	-0.13115
Chr10_19400001_19420000	0.281435	-0.199224
Chr10_19410001_19430000	0.183237	-0.368728
Chr10_19420001_19440000	0.192394	-0.472824
Chr10_19430001_19450000	0.159214	-0.456293
Chr10_19440001_19460000	0.127841	-0.122966
Chr10_19450001_19470000	0.162596	0.160936
Chr10_19460001_19480000	0.155924	0.0989133
Chr10_19470001_19490000	0.0818209	0.0965126
Chr10_19480001_19500000	0.040417	0.11079
Chr10_19490001_19510000	0.082924	-0.0869844
Chr10_19500001_19520000	0.133417	-0.241105
Chr10_19510001_19530000	0.112139	-0.17788
Chr10_19520001_19540000	0.102624	-0.0519219
Chr10_19530001_19550000	0.123703	-0.00937383
Chr10_19540001_19560000	0.129254	0.135479
Chr10_19550001_19570000	0.116932	0.405088
Chr10_19560001_19580000	0.181415	0.758097
Chr10_19570001_19590000	0.259401	1.38028
Chr10_19580001_19600000	0.24465	1.15212
Chr10_19590001_19610000	0.146556	0.490371
Chr10_19600001_19620000	0.106443	0.375639
Chr10_19610001_19630000	0.0799123	0.290679
Chr10_19620001_19640000	0.0796627	0.38793
Chr10_19630001_19650000	0.09891	0.514963
Chr10_19640001_19660000	0.100288	0.191073
Chr10_19650001_19670000	0.107961	0.121334
Chr10_19660001_19680000	0.110878	0.289058
Chr10_19670001_19690000	0.123432	0.690132
Chr10_19680001_19700000	0.174711	0.897835
Chr10_19690001_19710000	0.193428	1.26804
Chr10_19700001_19720000	0.108635	0.526799
Chr10_19710001_19730000	0.0728009	0.346656
Chr10_19720001_19740000	0.077139	0.416795
Chr10_19730001_19750000	0.0874725	0.516307
Chr10_19740001_19760000	0.11196	0.657799
Chr10_19750001_19770000	0.131473	0.629166
Chr10_19760001_19780000	0.107661	0.407882
Chr10_19770001_19790000	0.0932808	0.264479
Chr10_19780001_19800000	0.0843374	0.322135
Chr10_19790001_19810000	0.0943077	0.556059
Chr10_19800001_19820000	0.0545273	0.369436
Chr10_19810001_19830000	0.0584052	0.165589
Chr10_19820001_19840000	0.0886511	0.212517
Chr10_19830001_19850000	0.0984553	0.458861
Chr10_19840001_19860000	0.0931308	0.427279
Chr10_19850001_19870000	0.0477311	0.07491
Chr10_19860001_19880000	0.0681669	0.0812288
Chr10_19870001_19890000	0.09885	0.135753
Chr10_19880001_19900000	0.0964547	0.153908
Chr10_19890001_19910000	0.0476955	0.0736471
Chr10_19900001_19920000	0.0600888	0.0480357
Chr10_19910001_19930000	0.127805	0.161281
Chr10_19920001_19940000	0.155024	0.571718
Chr10_19930001_19950000	0.0978437	0.806514
Chr10_19940001_19960000	0.083579	0.897
Chr10_19950001_19970000	0.125352	0.631139
Chr10_19960001_19980000	0.159199	0.292444
Chr10_19970001_19990000	0.189299	0.540228
Chr10_19980001_20000000	0.177611	0.843878
Chr10_19990001_20010000	0.172655	0.647029
Chr10_20000001_20020000	0.189119	0.708948
Chr10_20010001_20030000	0.137226	0.669053
Chr10_20020001_20040000	0.115701	0.826818
Chr10_20030001_20050000	0.132947	0.729379
Chr10_20040001_20060000	0.115917	0.186537
Chr10_20050001_20070000	0.113581	0.173019
Chr10_20060001_20080000	0.11941	0.354438
Chr10_20070001_20090000	0.107171	0.28097
Chr10_20080001_20100000	0.160001	0.632704
Chr10_20090001_20110000	0.216959	1.05938
Chr10_20100001_20120000	0.197427	0.759105
Chr10_20110001_20130000	0.164714	0.487768
Chr10_20120001_20140000	0.131378	0.411567
Chr10_20130001_20150000	0.129	0.410507
Chr10_20140001_20160000	0.142278	0.61307
Chr10_20150001_20170000	0.141773	0.920186
Chr10_20160001_20180000	0.137624	0.482699
Chr10_20170001_20190000	0.150408	0.144682
[truncated: 255,602+ more rows]
