# Supplementary material for: Selection signatures in tropical cattle are enriched for promoter and coding regions and reveal missense mutations in the damage response gene HELB
Source: Genet Sel Evol. 2020 May 27;52:27. doi: 10.1186/s12711-020-00546-6 (PMC7251699; doi:10.1186/s12711-020-00546-6)
Supplement: Supplementary file 8 — Additional file 8: Table S7. 1194 detected selective sweeps (206 kb) bins in African taurine cattle compared to African indicine. [file 12711_2020_546_MOESM8_ESM.xlsx]

## Sheet: Table S7
Table S7 : Detected Selective sweeps (20 Kb) bins in African Taurine cattle compared to African Indicine
Reg_id	chr	start	end	Fst	pi
Chr1_8580001_8600000	Chr1	8580001	8600000	0.333984	2.72881
Chr1_25590001_25610000	Chr1	25590001	25610000	0.330537	2.46959
Chr1_30130001_30150000	Chr1	30130001	30150000	0.306926	2.88511
Chr1_33510001_33530000	Chr1	33510001	33530000	0.356434	2.32452
Chr1_33840001_33860000	Chr1	33840001	33860000	0.396745	2.63027
Chr1_50260001_50280000	Chr1	50260001	50280000	0.37828	2.2974
Chr1_50270001_50290000	Chr1	50270001	50290000	0.387154	2.27905
Chr1_59230001_59250000	Chr1	59230001	59250000	0.36879	2.47465
Chr1_59290001_59310000	Chr1	59290001	59310000	0.399906	2.27405
Chr1_64500001_64520000	Chr1	64500001	64520000	0.430758	2.08094
Chr1_64510001_64530000	Chr1	64510001	64530000	0.457974	2.14783
Chr1_64530001_64550000	Chr1	64530001	64550000	0.475444	1.76237
Chr1_64540001_64560000	Chr1	64540001	64560000	0.435728	2.05099
Chr1_65830001_65850000	Chr1	65830001	65850000	0.360002	2.5128
Chr1_65870001_65890000	Chr1	65870001	65890000	0.31586	2.86849
Chr1_66760001_66780000	Chr1	66760001	66780000	0.383692	2.96193
Chr1_66920001_66940000	Chr1	66920001	66940000	0.425251	1.90982
Chr1_66930001_66950000	Chr1	66930001	66950000	0.538384	2.07353
Chr1_66940001_66960000	Chr1	66940001	66960000	0.544645	1.73891
Chr1_67270001_67290000	Chr1	67270001	67290000	0.419589	2.28845
Chr1_67280001_67300000	Chr1	67280001	67300000	0.403302	2.6879
Chr1_74710001_74730000	Chr1	74710001	74730000	0.391395	2.15315
Chr1_75970001_75990000	Chr1	75970001	75990000	0.337307	3.22752
Chr1_80710001_80730000	Chr1	80710001	80730000	0.348726	2.34476
Chr1_80780001_80800000	Chr1	80780001	80800000	0.32601	2.63725
Chr1_80810001_80830000	Chr1	80810001	80830000	0.376158	2.6492
Chr1_81720001_81740000	Chr1	81720001	81740000	0.39177	2.19096
Chr1_81730001_81750000	Chr1	81730001	81750000	0.382348	2.25111
Chr1_82010001_82030000	Chr1	82010001	82030000	0.403294	2.0223
Chr1_89330001_89350000	Chr1	89330001	89350000	0.377283	2.15497
Chr1_111820001_111840000	Chr1	111820001	111840000	0.417759	2.3289
Chr1_111830001_111850000	Chr1	111830001	111850000	0.405657	2.13031
Chr1_111920001_111940000	Chr1	111920001	111940000	0.348992	2.90928
Chr1_112540001_112560000	Chr1	112540001	112560000	0.393944	2.43368
Chr1_112570001_112590000	Chr1	112570001	112590000	0.30897	2.76894
Chr1_113860001_113880000	Chr1	113860001	113880000	0.450731	1.82285
Chr1_113870001_113890000	Chr1	113870001	113890000	0.470338	1.76189
Chr1_115610001_115630000	Chr1	115610001	115630000	0.309516	2.7194
Chr1_132190001_132210000	Chr1	132190001	132210000	0.399539	2.16614
Chr1_132200001_132220000	Chr1	132200001	132220000	0.363113	2.48228
Chr1_137840001_137860000	Chr1	137840001	137860000	0.310489	2.75259
Chr1_137850001_137870000	Chr1	137850001	137870000	0.341949	2.76051
Chr1_137860001_137880000	Chr1	137860001	137880000	0.385506	2.72173
Chr1_137870001_137890000	Chr1	137870001	137890000	0.356767	2.43368
Chr1_137880001_137900000	Chr1	137880001	137900000	0.382454	2.30457
Chr1_153660001_153680000	Chr1	153660001	153680000	0.309333	2.89827
Chr1_156840001_156860000	Chr1	156840001	156860000	0.304565	2.83482
Chr10_1140001_1160000	Chr10	1140001	1160000	0.405336	2.45514
Chr10_15070001_15090000	Chr10	15070001	15090000	0.438695	2.30319
Chr10_15260001_15280000	Chr10	15260001	15280000	0.499545	2.31169
Chr10_15270001_15290000	Chr10	15270001	15290000	0.410777	2.314
Chr10_15330001_15350000	Chr10	15330001	15350000	0.417822	2.4389
Chr10_15660001_15680000	Chr10	15660001	15680000	0.497192	1.67439
Chr10_15670001_15690000	Chr10	15670001	15690000	0.424225	2.26112
Chr10_18010001_18030000	Chr10	18010001	18030000	0.575415	1.93316
Chr10_34830001_34850000	Chr10	34830001	34850000	0.400567	2.58953
Chr10_34970001_34990000	Chr10	34970001	34990000	0.349221	2.33815
Chr10_35050001_35070000	Chr10	35050001	35070000	0.414287	2.66624
Chr10_35060001_35080000	Chr10	35060001	35080000	0.432983	2.59746
Chr10_38090001_38110000	Chr10	38090001	38110000	0.434579	2.21005
Chr10_43610001_43630000	Chr10	43610001	43630000	0.335655	2.47904
Chr10_44330001_44350000	Chr10	44330001	44350000	0.30017	2.93365
Chr10_60310001_60330000	Chr10	60310001	60330000	0.290758	2.99431
Chr10_67700001_67720000	Chr10	67700001	67720000	0.366847	2.42674
Chr10_76110001_76130000	Chr10	76110001	76130000	0.422821	2.01723
Chr10_76120001_76140000	Chr10	76120001	76140000	0.434728	1.914
Chr10_84250001_84270000	Chr10	84250001	84270000	0.3423	2.96558
Chr10_94550001_94570000	Chr10	94550001	94570000	0.335509	2.9755
Chr10_98560001_98580000	Chr10	98560001	98580000	0.334682	2.55242
Chr11_8880001_8900000	Chr11	8880001	8900000	0.46667	2.59104
Chr11_8890001_8910000	Chr11	8890001	8910000	0.444765	2.63678
Chr11_8960001_8980000	Chr11	8960001	8980000	0.34935	2.33082
Chr11_9720001_9740000	Chr11	9720001	9740000	0.329558	2.84104
Chr11_9730001_9750000	Chr11	9730001	9750000	0.434757	2.28642
Chr11_26050001_26070000	Chr11	26050001	26070000	0.289842	2.99265
Chr11_26900001_26920000	Chr11	26900001	26920000	0.397526	2.61865
Chr11_26910001_26930000	Chr11	26910001	26930000	0.392791	2.39629
Chr11_27200001_27220000	Chr11	27200001	27220000	0.483267	1.81134
Chr11_27210001_27230000	Chr11	27210001	27230000	0.474592	2.36747
Chr11_27470001_27490000	Chr11	27470001	27490000	0.446296	2.27837
Chr11_27610001_27630000	Chr11	27610001	27630000	0.389417	2.23282
Chr11_27730001_27750000	Chr11	27730001	27750000	0.375864	2.18524
Chr11_27750001_27770000	Chr11	27750001	27770000	0.346747	2.69177
Chr11_27760001_27780000	Chr11	27760001	27780000	0.380148	2.25873
Chr11_27850001_27870000	Chr11	27850001	27870000	0.61351	1.97935
Chr11_27860001_27880000	Chr11	27860001	27880000	0.620788	2.19117
Chr11_27870001_27890000	Chr11	27870001	27890000	0.522381	1.96423
Chr11_27960001_27980000	Chr11	27960001	27980000	0.394436	2.04466
Chr11_27980001_28000000	Chr11	27980001	28000000	0.416203	2.28749
Chr11_28090001_28110000	Chr11	28090001	28110000	0.337703	3.62957
Chr11_28920001_28940000	Chr11	28920001	28940000	0.338093	2.41792
Chr11_31750001_31770000	Chr11	31750001	31770000	0.360067	2.28308
Chr11_31850001_31870000	Chr11	31850001	31870000	0.388115	3.34833
Chr11_31870001_31890000	Chr11	31870001	31890000	0.527942	2.61463
Chr11_31880001_31900000	Chr11	31880001	31900000	0.632917	2.41059
Chr11_31900001_31920000	Chr11	31900001	31920000	0.460848	2.7261
Chr11_32000001_32020000	Chr11	32000001	32020000	0.418498	2.19702
Chr11_33000001_33020000	Chr11	33000001	33020000	0.391492	2.23084
Chr11_33500001_33520000	Chr11	33500001	33520000	0.299846	2.99797
Chr11_34220001_34240000	Chr11	34220001	34240000	0.446617	1.95859
Chr11_34230001_34250000	Chr11	34230001	34250000	0.435728	2.16102
Chr11_34270001_34290000	Chr11	34270001	34290000	0.410382	1.99118
Chr11_38090001_38110000	Chr11	38090001	38110000	0.571422	1.78456
Chr11_38100001_38120000	Chr11	38100001	38120000	0.579268	2.15806
Chr11_38110001_38130000	Chr11	38110001	38130000	0.520719	2.07646
Chr11_38120001_38140000	Chr11	38120001	38140000	0.475962	1.91278
Chr11_38170001_38190000	Chr11	38170001	38190000	0.466416	1.78468
Chr11_38180001_38200000	Chr11	38180001	38200000	0.371998	2.18001
Chr11_38190001_38210000	Chr11	38190001	38210000	0.348877	2.39379
Chr11_38200001_38220000	Chr11	38200001	38220000	0.36827	2.59973
Chr11_38350001_38370000	Chr11	38350001	38370000	0.496881	1.82652
Chr11_38360001_38380000	Chr11	38360001	38380000	0.42764	1.86873
Chr11_38830001_38850000	Chr11	38830001	38850000	0.41361	2.47844
Chr11_38970001_38990000	Chr11	38970001	38990000	0.324939	2.55234
Chr11_39310001_39330000	Chr11	39310001	39330000	0.427121	1.97362
Chr11_40040001_40060000	Chr11	40040001	40060000	0.377492	2.3423
Chr11_40360001_40380000	Chr11	40360001	40380000	0.4187	2.04803
Chr11_48720001_48740000	Chr11	48720001	48740000	0.447567	1.99971
Chr11_48730001_48750000	Chr11	48730001	48750000	0.450353	1.86504
Chr11_48780001_48800000	Chr11	48780001	48800000	0.505297	2.16147
Chr11_48790001_48810000	Chr11	48790001	48810000	0.548777	1.82322
Chr11_48980001_49000000	Chr11	48980001	49000000	0.389517	2.32548
Chr11_49180001_49200000	Chr11	49180001	49200000	0.510338	1.60708
Chr11_49190001_49210000	Chr11	49190001	49210000	0.453009	1.87416
Chr11_49740001_49760000	Chr11	49740001	49760000	0.32146	2.67291
Chr11_49750001_49770000	Chr11	49750001	49770000	0.343431	3.01323
Chr11_49760001_49780000	Chr11	49760001	49780000	0.35398	2.61903
Chr11_50030001_50050000	Chr11	50030001	50050000	0.340848	2.58273
Chr11_50430001_50450000	Chr11	50430001	50450000	0.393118	2.16163
Chr11_50450001_50470000	Chr11	50450001	50470000	0.401535	2.28888
Chr11_50460001_50480000	Chr11	50460001	50480000	0.391285	3.05226
Chr11_50530001_50550000	Chr11	50530001	50550000	0.434934	2.22333
Chr11_50640001_50660000	Chr11	50640001	50660000	0.418037	2.10731
Chr11_50650001_50670000	Chr11	50650001	50670000	0.424291	2.45625
Chr11_56980001_57000000	Chr11	56980001	57000000	0.401467	2.14447
Chr11_60380001_60400000	Chr11	60380001	60400000	0.363625	2.38814
Chr11_60390001_60410000	Chr11	60390001	60410000	0.355101	2.76253
Chr11_62880001_62900000	Chr11	62880001	62900000	0.514796	1.8079
Chr11_62890001_62910000	Chr11	62890001	62910000	0.500972	1.67495
Chr11_63550001_63570000	Chr11	63550001	63570000	0.426511	1.98331
Chr11_63560001_63580000	Chr11	63560001	63580000	0.411567	2.72495
Chr11_63570001_63590000	Chr11	63570001	63590000	0.395078	3.00047
Chr11_64380001_64400000	Chr11	64380001	64400000	0.393135	2.1076
Chr11_65840001_65860000	Chr11	65840001	65860000	0.355712	2.34686
Chr11_65860001_65880000	Chr11	65860001	65880000	0.402176	2.3707
Chr11_65870001_65890000	Chr11	65870001	65890000	0.437413	2.02007
Chr11_65950001_65970000	Chr11	65950001	65970000	0.328479	2.61936
Chr11_66030001_66050000	Chr11	66030001	66050000	0.408009	2.11711
Chr11_66220001_66240000	Chr11	66220001	66240000	0.413859	2.75983
Chr11_66230001_66250000	Chr11	66230001	66250000	0.311538	2.74759
Chr11_77310001_77330000	Chr11	77310001	77330000	0.349108	2.34952
Chr11_79030001_79050000	Chr11	79030001	79050000	0.390886	2.39052
Chr11_79040001_79060000	Chr11	79040001	79060000	0.439496	1.88524
Chr11_80290001_80310000	Chr11	80290001	80310000	0.395691	2.02165
Chr11_82310001_82330000	Chr11	82310001	82330000	0.323099	2.56218
Chr11_82320001_82340000	Chr11	82320001	82340000	0.372167	2.35872
Chr11_82330001_82350000	Chr11	82330001	82350000	0.353565	2.53675
Chr11_82340001_82360000	Chr11	82340001	82360000	0.364355	2.35096
Chr11_82350001_82370000	Chr11	82350001	82370000	0.444994	2.18353
Chr11_82360001_82380000	Chr11	82360001	82380000	0.375928	2.37858
Chr11_91880001_91900000	Chr11	91880001	91900000	0.372525	2.68537
Chr11_92010001_92030000	Chr11	92010001	92030000	0.365617	2.48789
Chr11_92020001_92040000	Chr11	92020001	92040000	0.347861	2.67014
Chr11_101640001_101660000	Chr11	101640001	101660000	0.432633	1.89775
Chr11_101650001_101670000	Chr11	101650001	101670000	0.495856	2.4156
Chr11_101660001_101680000	Chr11	101660001	101680000	0.450098	2.58536
Chr11_104550001_104570000	Chr11	104550001	104570000	0.364456	2.72685
Chr11_104560001_104580000	Chr11	104560001	104580000	0.381283	2.47151
Chr12_10470001_10490000	Chr12	10470001	10490000	0.369031	2.52857
Chr12_10480001_10500000	Chr12	10480001	10500000	0.36156	2.96605
Chr12_12570001_12590000	Chr12	12570001	12590000	0.44842	2.24837
Chr12_13770001_13790000	Chr12	13770001	13790000	0.42128	1.93211
Chr12_13780001_13800000	Chr12	13780001	13800000	0.446778	2.19098
Chr12_14790001_14810000	Chr12	14790001	14810000	0.527188	1.65192
Chr12_16990001_17010000	Chr12	16990001	17010000	0.383626	2.45836
Chr12_17550001_17570000	Chr12	17550001	17570000	0.326056	2.59765
Chr12_18810001_18830000	Chr12	18810001	18830000	0.481282	1.72193
Chr12_18930001_18950000	Chr12	18930001	18950000	0.506851	2.09445
Chr12_18940001_18960000	Chr12	18940001	18960000	0.653699	2.53752
Chr12_18950001_18970000	Chr12	18950001	18970000	0.603883	2.40633
Chr12_18960001_18980000	Chr12	18960001	18980000	0.452386	2.44064
Chr12_18970001_18990000	Chr12	18970001	18990000	0.485204	1.88226
Chr12_18980001_19000000	Chr12	18980001	19000000	0.535682	1.55382
Chr12_18990001_19010000	Chr12	18990001	19010000	0.542826	1.95859
Chr12_19000001_19020000	Chr12	19000001	19020000	0.410918	2.31613
Chr12_20190001_20210000	Chr12	20190001	20210000	0.374847	3.04706
Chr12_20200001_20220000	Chr12	20200001	20220000	0.380652	2.24799
Chr12_20490001_20510000	Chr12	20490001	20510000	0.353837	2.32662
Chr12_20680001_20700000	Chr12	20680001	20700000	0.360648	2.50352
Chr12_26380001_26400000	Chr12	26380001	26400000	0.354979	2.40285
Chr12_26390001_26410000	Chr12	26390001	26410000	0.376737	2.74769
Chr12_26400001_26420000	Chr12	26400001	26420000	0.378146	2.52901
Chr12_26410001_26430000	Chr12	26410001	26430000	0.369898	2.29316
Chr12_26420001_26440000	Chr12	26420001	26440000	0.361482	2.41367
Chr12_26500001_26520000	Chr12	26500001	26520000	0.485544	2.4305
Chr12_26510001_26530000	Chr12	26510001	26530000	0.479929	2.4208
Chr12_26550001_26570000	Chr12	26550001	26570000	0.407948	2.12816
Chr12_26830001_26850000	Chr12	26830001	26850000	0.4486	2.03695
Chr12_27590001_27610000	Chr12	27590001	27610000	0.52781	1.69303
Chr12_27620001_27640000	Chr12	27620001	27640000	0.423599	1.98946
Chr12_27630001_27650000	Chr12	27630001	27650000	0.417509	2.24091
Chr12_27640001_27660000	Chr12	27640001	27660000	0.426883	2.42485
Chr12_27650001_27670000	Chr12	27650001	27670000	0.452015	2.37833
Chr12_27660001_27680000	Chr12	27660001	27680000	0.445472	2.13745
Chr12_27850001_27870000	Chr12	27850001	27870000	0.522883	2.29959
Chr12_27860001_27880000	Chr12	27860001	27880000	0.469669	2.13614
Chr12_29190001_29210000	Chr12	29190001	29210000	0.59487	1.63681
Chr12_29880001_29900000	Chr12	29880001	29900000	0.376667	2.6485
Chr12_29950001_29970000	Chr12	29950001	29970000	0.549222	2.54173
Chr12_29960001_29980000	Chr12	29960001	29980000	0.571687	2.13624
Chr12_29970001_29990000	Chr12	29970001	29990000	0.486788	1.72753
Chr12_35520001_35540000	Chr12	35520001	35540000	0.554614	1.59694
Chr12_35530001_35550000	Chr12	35530001	35550000	0.686051	1.8959
Chr12_35540001_35560000	Chr12	35540001	35560000	0.629033	1.40824
Chr12_36890001_36910000	Chr12	36890001	36910000	0.416843	1.93778
Chr12_36960001_36980000	Chr12	36960001	36980000	0.536694	1.96631
Chr12_37040001_37060000	Chr12	37040001	37060000	0.457093	1.99318
Chr12_37150001_37170000	Chr12	37150001	37170000	0.446543	1.91391
Chr12_37800001_37820000	Chr12	37800001	37820000	0.403758	2.50074
Chr12_37810001_37830000	Chr12	37810001	37830000	0.419586	2.77142
Chr12_37840001_37860000	Chr12	37840001	37860000	0.524272	2.30827
Chr12_37850001_37870000	Chr12	37850001	37870000	0.514558	2.40331
Chr12_37860001_37880000	Chr12	37860001	37880000	0.555175	2.50738
Chr12_37870001_37890000	Chr12	37870001	37890000	0.614304	2.36118
Chr12_37880001_37900000	Chr12	37880001	37900000	0.598474	2.30749
Chr12_37910001_37930000	Chr12	37910001	37930000	0.495427	2.13494
Chr12_37920001_37940000	Chr12	37920001	37940000	0.487895	2.26165
Chr12_37930001_37950000	Chr12	37930001	37950000	0.496472	2.36916
Chr12_37940001_37960000	Chr12	37940001	37960000	0.548197	2.60067
Chr12_37950001_37970000	Chr12	37950001	37970000	0.562864	2.44485
Chr12_37960001_37980000	Chr12	37960001	37980000	0.450459	1.94462
Chr12_38000001_38020000	Chr12	38000001	38020000	0.399001	2.21976
Chr12_38010001_38030000	Chr12	38010001	38030000	0.529807	1.76339
Chr12_38020001_38040000	Chr12	38020001	38040000	0.554527	1.93272
Chr12_38030001_38050000	Chr12	38030001	38050000	0.574648	1.86471
Chr12_38040001_38060000	Chr12	38040001	38060000	0.525094	1.84891
Chr12_38050001_38070000	Chr12	38050001	38070000	0.477043	1.79257
Chr12_38710001_38730000	Chr12	38710001	38730000	0.382959	2.19137
Chr12_38750001_38770000	Chr12	38750001	38770000	0.378277	2.15199
Chr12_38760001_38780000	Chr12	38760001	38780000	0.407975	2.90034
Chr12_38770001_38790000	Chr12	38770001	38790000	0.448167	2.4191
Chr12_38780001_38800000	Chr12	38780001	38800000	0.416033	2.21332
Chr12_38840001_38860000	Chr12	38840001	38860000	0.365878	2.34195
Chr12_42230001_42250000	Chr12	42230001	42250000	0.331438	2.54051
Chr12_47950001_47970000	Chr12	47950001	47970000	0.423417	2.05253
Chr12_48330001_48350000	Chr12	48330001	48350000	0.327585	2.96283
Chr12_51010001_51030000	Chr12	51010001	51030000	0.49247	2.16327
Chr12_51020001_51040000	Chr12	51020001	51040000	0.447179	2.14249
Chr12_51080001_51100000	Chr12	51080001	51100000	0.377942	2.46478
Chr12_51090001_51110000	Chr12	51090001	51110000	0.328065	2.7094
Chr12_51110001_51130000	Chr12	51110001	51130000	0.421972	2.22146
Chr12_51270001_51290000	Chr12	51270001	51290000	0.383113	2.50102
Chr12_51390001_51410000	Chr12	51390001	51410000	0.327891	2.6653
Chr12_51470001_51490000	Chr12	51470001	51490000	0.330144	2.51726
Chr12_52180001_52200000	Chr12	52180001	52200000	0.40427	2.85346
Chr12_52190001_52210000	Chr12	52190001	52210000	0.381277	2.85328
Chr12_52430001_52450000	Chr12	52430001	52450000	0.513921	2.07489
Chr12_52440001_52460000	Chr12	52440001	52460000	0.459801	1.78602
Chr12_52500001_52520000	Chr12	52500001	52520000	0.512126	1.83499
Chr12_53110001_53130000	Chr12	53110001	53130000	0.353113	3.37394
Chr12_53120001_53140000	Chr12	53120001	53140000	0.341962	3.04494
Chr12_53350001_53370000	Chr12	53350001	53370000	0.446783	2.97798
Chr12_53360001_53380000	Chr12	53360001	53380000	0.376759	2.78871
Chr12_54040001_54060000	Chr12	54040001	54060000	0.413976	2.76841
Chr12_57360001_57380000	Chr12	57360001	57380000	0.379683	2.23298
Chr12_58020001_58040000	Chr12	58020001	58040000	0.269066	3.32621
Chr12_60840001_60860000	Chr12	60840001	60860000	0.364367	2.62159
Chr12_60850001_60870000	Chr12	60850001	60870000	0.397174	2.4636
Chr12_60860001_60880000	Chr12	60860001	60880000	0.522775	2.07167
Chr12_61090001_61110000	Chr12	61090001	61110000	0.43178	2.90657
Chr12_61100001_61120000	Chr12	61100001	61120000	0.440967	2.93015
Chr12_61110001_61130000	Chr12	61110001	61130000	0.399322	2.87562
Chr12_61120001_61140000	Chr12	61120001	61140000	0.484765	2.43629
Chr12_61130001_61150000	Chr12	61130001	61150000	0.516658	1.74772
Chr12_61250001_61270000	Chr12	61250001	61270000	0.33284	2.83128
Chr12_61260001_61280000	Chr12	61260001	61280000	0.367208	2.83607
Chr12_61270001_61290000	Chr12	61270001	61290000	0.416946	3.06548
Chr12_61280001_61300000	Chr12	61280001	61300000	0.340972	2.9518
Chr12_61510001_61530000	Chr12	61510001	61530000	0.379095	2.13967
Chr12_64110001_64130000	Chr12	64110001	64130000	0.390987	2.40281
Chr12_64120001_64140000	Chr12	64120001	64140000	0.360606	2.51983
Chr12_66920001_66940000	Chr12	66920001	66940000	0.347711	2.45392
Chr12_66930001_66950000	Chr12	66930001	66950000	0.399639	2.46151
Chr12_89840001_89860000	Chr12	89840001	89860000	0.340765	2.60033
Chr12_89850001_89870000	Chr12	89850001	89870000	0.329544	2.85557
Chr12_89930001_89950000	Chr12	89930001	89950000	0.352417	2.43155
Chr12_89940001_89960000	Chr12	89940001	89960000	0.32481	2.72942
Chr12_89950001_89970000	Chr12	89950001	89970000	0.322584	2.71414
Chr12_89990001_90010000	Chr12	89990001	90010000	0.322599	3.02037
Chr12_90000001_90020000	Chr12	90000001	90020000	0.306265	2.74017
Chr12_90630001_90650000	Chr12	90630001	90650000	0.374915	2.55276
Chr12_90640001_90660000	Chr12	90640001	90660000	0.357999	2.46505
Chr13_33880001_33900000	Chr13	33880001	33900000	0.463787	2.53413
Chr13_33890001_33910000	Chr13	33890001	33910000	0.493555	2.29234
Chr13_33900001_33920000	Chr13	33900001	33920000	0.57443	2.20342
Chr13_33910001_33930000	Chr13	33910001	33930000	0.627554	2.31068
Chr13_33940001_33960000	Chr13	33940001	33960000	0.616619	2.307
Chr13_33950001_33970000	Chr13	33950001	33970000	0.459995	2.06697
Chr13_33960001_33980000	Chr13	33960001	33980000	0.355786	2.69957
Chr13_33970001_33990000	Chr13	33970001	33990000	0.371855	2.62199
Chr13_34050001_34070000	Chr13	34050001	34070000	0.391982	2.65175
Chr13_35150001_35170000	Chr13	35150001	35170000	0.469055	2.33484
Chr13_35240001_35260000	Chr13	35240001	35260000	0.393011	2.05454
Chr13_36250001_36270000	Chr13	36250001	36270000	0.346232	2.40888
Chr13_36320001_36340000	Chr13	36320001	36340000	0.513707	2.20474
Chr13_36330001_36350000	Chr13	36330001	36350000	0.511536	2.18087
Chr13_36340001_36360000	Chr13	36340001	36360000	0.575756	2.80488
Chr13_37920001_37940000	Chr13	37920001	37940000	0.44411	1.8993
Chr13_37950001_37970000	Chr13	37950001	37970000	0.456255	1.9074
Chr13_38000001_38020000	Chr13	38000001	38020000	0.374003	2.36249
Chr13_38010001_38030000	Chr13	38010001	38030000	0.365179	2.69601
Chr13_38030001_38050000	Chr13	38030001	38050000	0.37233	2.3117
Chr13_38040001_38060000	Chr13	38040001	38060000	0.412455	2.14667
Chr13_39180001_39200000	Chr13	39180001	39200000	0.451456	1.98222
Chr13_39200001_39220000	Chr13	39200001	39220000	0.431214	1.95964
Chr13_77620001_77640000	Chr13	77620001	77640000	0.389075	2.45237
Chr13_78960001_78980000	Chr13	78960001	78980000	0.3642	2.49758
Chr14_2090001_2110000	Chr14	2090001	2110000	0.411585	2.75329
Chr14_2100001_2120000	Chr14	2100001	2120000	0.447312	2.40967
Chr14_8490001_8510000	Chr14	8490001	8510000	0.408048	2.32859
Chr14_8500001_8520000	Chr14	8500001	8520000	0.398664	2.66284
Chr14_8510001_8530000	Chr14	8510001	8530000	0.393656	2.22242
Chr14_37660001_37680000	Chr14	37660001	37680000	0.305862	3.17363
Chr14_60800001_60820000	Chr14	60800001	60820000	0.379636	2.59328
Chr14_60810001_60830000	Chr14	60810001	60830000	0.398719	2.69756
Chr14_63610001_63630000	Chr14	63610001	63630000	0.382269	2.08948
Chr14_63620001_63640000	Chr14	63620001	63640000	0.429174	2.32734
Chr14_63630001_63650000	Chr14	63630001	63650000	0.42118	2.60038
Chr14_63640001_63660000	Chr14	63640001	63660000	0.333332	2.63671
Chr14_71560001_71580000	Chr14	71560001	71580000	0.393039	2.14356
Chr14_71820001_71840000	Chr14	71820001	71840000	0.491152	1.83182
Chr14_71960001_71980000	Chr14	71960001	71980000	0.412592	2.02457
Chr14_83820001_83840000	Chr14	83820001	83840000	0.298719	2.94311
Chr15_15390001_15410000	Chr15	15390001	15410000	0.283894	3.0903
Chr15_22920001_22940000	Chr15	22920001	22940000	0.353145	2.29967
Chr15_23440001_23460000	Chr15	23440001	23460000	0.370518	2.5766
Chr15_23450001_23470000	Chr15	23450001	23470000	0.32611	2.92107
Chr15_26860001_26880000	Chr15	26860001	26880000	0.394844	2.41033
Chr15_37170001_37190000	Chr15	37170001	37190000	0.356918	2.70775
Chr15_39200001_39220000	Chr15	39200001	39220000	0.404599	2.33152
Chr15_39800001_39820000	Chr15	39800001	39820000	0.476283	2.26562
Chr15_39910001_39930000	Chr15	39910001	39930000	0.331662	2.56887
Chr15_39920001_39940000	Chr15	39920001	39940000	0.468324	2.61677
Chr15_39930001_39950000	Chr15	39930001	39950000	0.384801	2.23615
Chr15_40040001_40060000	Chr15	40040001	40060000	0.425074	2.35044
Chr15_40050001_40070000	Chr15	40050001	40070000	0.490476	2.58825
Chr15_40570001_40590000	Chr15	40570001	40590000	0.377572	2.29054
Chr15_57770001_57790000	Chr15	57770001	57790000	0.353085	2.92983
Chr15_57840001_57860000	Chr15	57840001	57860000	0.566318	2.33537
Chr15_57850001_57870000	Chr15	57850001	57870000	0.511427	2.0561
Chr15_57940001_57960000	Chr15	57940001	57960000	0.449517	2.0858
Chr15_57950001_57970000	Chr15	57950001	57970000	0.47702	1.8774
Chr15_66090001_66110000	Chr15	66090001	66110000	0.361423	2.44323
Chr15_67170001_67190000	Chr15	67170001	67190000	0.414257	2.00381
Chr16_300001_320000	Chr16	300001	320000	0.300986	3.09169
Chr16_5180001_5200000	Chr16	5180001	5200000	0.447744	1.88396
Chr16_6240001_6260000	Chr16	6240001	6260000	0.472536	1.91231
Chr16_6250001_6270000	Chr16	6250001	6270000	0.478268	1.85624
Chr16_6270001_6290000	Chr16	6270001	6290000	0.607572	1.56406
Chr16_6280001_6300000	Chr16	6280001	6300000	0.577608	1.91848
Chr16_6290001_6310000	Chr16	6290001	6310000	0.553885	1.64565
Chr16_6300001_6320000	Chr16	6300001	6320000	0.547788	1.7323
Chr16_6310001_6330000	Chr16	6310001	6330000	0.485392	1.94054
Chr16_6320001_6340000	Chr16	6320001	6340000	0.476046	1.80548
Chr16_6330001_6350000	Chr16	6330001	6350000	0.429042	1.89801
Chr16_6430001_6450000	Chr16	6430001	6450000	0.34529	2.45343
Chr16_6440001_6460000	Chr16	6440001	6460000	0.427338	2.4205
Chr16_6450001_6470000	Chr16	6450001	6470000	0.561483	2.26582
Chr16_6460001_6480000	Chr16	6460001	6480000	0.571438	2.12078
Chr16_6470001_6490000	Chr16	6470001	6490000	0.403209	2.25901
Chr16_6510001_6530000	Chr16	6510001	6530000	0.375219	2.26217
Chr16_8160001_8180000	Chr16	8160001	8180000	0.355152	2.5694
Chr16_8300001_8320000	Chr16	8300001	8320000	0.300974	3.24455
Chr16_8570001_8590000	Chr16	8570001	8590000	0.289945	3.30258
Chr16_8580001_8600000	Chr16	8580001	8600000	0.305082	2.99862
Chr16_8590001_8610000	Chr16	8590001	8610000	0.334553	2.63461
Chr16_8630001_8650000	Chr16	8630001	8650000	0.37687	2.92085
Chr16_8640001_8660000	Chr16	8640001	8660000	0.35386	2.94402
Chr16_8690001_8710000	Chr16	8690001	8710000	0.254924	3.7226
Chr16_8910001_8930000	Chr16	8910001	8930000	0.257109	3.68215
Chr16_25980001_26000000	Chr16	25980001	26000000	0.361807	2.37512
Chr16_25990001_26010000	Chr16	25990001	26010000	0.513976	2.48156
Chr16_26000001_26020000	Chr16	26000001	26020000	0.564519	1.86636
Chr16_27100001_27120000	Chr16	27100001	27120000	0.460296	2.02262
Chr16_27130001_27150000	Chr16	27130001	27150000	0.358739	2.29273
Chr16_27300001_27320000	Chr16	27300001	27320000	0.359151	2.28326
Chr16_27450001_27470000	Chr16	27450001	27470000	0.288925	3.21469
Chr16_30450001_30470000	Chr16	30450001	30470000	0.413449	1.98157
Chr16_30460001_30480000	Chr16	30460001	30480000	0.436624	2.09781
Chr16_40420001_40440000	Chr16	40420001	40440000	0.418919	2.68489
Chr16_40430001_40450000	Chr16	40430001	40450000	0.420445	2.34251
Chr16_40440001_40460000	Chr16	40440001	40460000	0.459356	1.78112
Chr16_45890001_45910000	Chr16	45890001	45910000	0.339219	2.59895
Chr16_46640001_46660000	Chr16	46640001	46660000	0.396126	3.18412
Chr16_46650001_46670000	Chr16	46650001	46670000	0.315838	2.78107
Chr17_5230001_5250000	Chr17	5230001	5250000	0.319716	2.88698
Chr17_16230001_16250000	Chr17	16230001	16250000	0.361105	2.40039
Chr17_19020001_19040000	Chr17	19020001	19040000	0.366363	2.61321
Chr17_20140001_20160000	Chr17	20140001	20160000	0.404338	2.52913
Chr17_20150001_20170000	Chr17	20150001	20170000	0.418429	2.72794
Chr17_21370001_21390000	Chr17	21370001	21390000	0.402108	2.046
Chr17_29150001_29170000	Chr17	29150001	29170000	0.351918	3.08514
Chr17_29160001_29180000	Chr17	29160001	29180000	0.356126	2.92226
Chr17_29170001_29190000	Chr17	29170001	29190000	0.326573	2.61665
Chr17_29230001_29250000	Chr17	29230001	29250000	0.305948	3.02047
Chr17_29240001_29260000	Chr17	29240001	29260000	0.382112	2.96706
Chr17_34550001_34570000	Chr17	34550001	34570000	0.395554	2.82383
Chr17_42740001_42760000	Chr17	42740001	42760000	0.35359	2.47479
Chr17_42830001_42850000	Chr17	42830001	42850000	0.419408	2.53165
Chr17_42840001_42860000	Chr17	42840001	42860000	0.411642	2.24281
Chr17_42960001_42980000	Chr17	42960001	42980000	0.339763	2.42738
Chr17_42980001_43000000	Chr17	42980001	43000000	0.304498	3.16321
Chr17_43100001_43120000	Chr17	43100001	43120000	0.315858	3.31493
Chr17_43110001_43130000	Chr17	43110001	43130000	0.407812	2.9494
Chr17_43120001_43140000	Chr17	43120001	43140000	0.392911	2.69793
Chr17_43140001_43160000	Chr17	43140001	43160000	0.442304	2.7263
Chr17_43150001_43170000	Chr17	43150001	43170000	0.437438	2.6817
Chr17_43280001_43300000	Chr17	43280001	43300000	0.4185	2.0894
Chr17_49230001_49250000	Chr17	49230001	49250000	0.307035	2.72205
Chr17_54640001_54660000	Chr17	54640001	54660000	0.40816	2.10577
Chr17_60940001_60960000	Chr17	60940001	60960000	0.399871	2.09031
Chr17_60950001_60970000	Chr17	60950001	60970000	0.398612	2.13147
Chr17_73480001_73500000	Chr17	73480001	73500000	0.412573	2.185
Chr17_73490001_73510000	Chr17	73490001	73510000	0.422729	2.36169
Chr17_73500001_73520000	Chr17	73500001	73520000	0.362704	2.43287
Chr17_73510001_73530000	Chr17	73510001	73530000	0.384516	2.89203
Chr17_73520001_73540000	Chr17	73520001	73540000	0.40433	3.51012
Chr18_39750001_39770000	Chr18	39750001	39770000	0.385921	2.46228
Chr18_39760001_39780000	Chr18	39760001	39780000	0.383235	2.41649
Chr18_41080001_41100000	Chr18	41080001	41100000	0.333922	2.71248
Chr18_52070001_52090000	Chr18	52070001	52090000	0.479984	1.98366
Chr18_52080001_52100000	Chr18	52080001	52100000	0.502981	2.52804
Chr18_52090001_52110000	Chr18	52090001	52110000	0.390827	2.81318
Chr18_52100001_52120000	Chr18	52100001	52120000	0.339038	3.09339
Chr18_52160001_52180000	Chr18	52160001	52180000	0.491834	1.74462
Chr19_2960001_2980000	Chr19	2960001	2980000	0.311492	3.1674
Chr19_23580001_23600000	Chr19	23580001	23600000	0.302335	2.81199
Chr19_23590001_23610000	Chr19	23590001	23610000	0.314286	2.88155
Chr19_24020001_24040000	Chr19	24020001	24040000	0.393585	2.24249
Chr19_24030001_24050000	Chr19	24030001	24050000	0.510492	2.04219
Chr19_24800001_24820000	Chr19	24800001	24820000	0.407155	2.13137
Chr19_28690001_28710000	Chr19	28690001	28710000	0.461757	1.82799
Chr19_39600001_39620000	Chr19	39600001	39620000	0.535844	1.65969
Chr19_39610001_39630000	Chr19	39610001	39630000	0.577697	1.9444
Chr19_39620001_39640000	Chr19	39620001	39640000	0.422467	2.24542
Chr19_47800001_47820000	Chr19	47800001	47820000	0.327033	2.57878
Chr19_48500001_48520000	Chr19	48500001	48520000	0.434008	1.93732
Chr19_48510001_48530000	Chr19	48510001	48530000	0.399128	2.48447
Chr19_48530001_48550000	Chr19	48530001	48550000	0.380878	2.55207
Chr19_48540001_48560000	Chr19	48540001	48560000	0.37753	2.50699
Chr19_48700001_48720000	Chr19	48700001	48720000	0.35376	2.3426
Chr19_52090001_52110000	Chr19	52090001	52110000	0.374536	2.28175
Chr19_52100001_52120000	Chr19	52100001	52120000	0.340781	2.68267
Chr2_6740001_6760000	Chr2	6740001	6760000	0.400489	3.23393
Chr2_6750001_6770000	Chr2	6750001	6770000	0.350794	3.29711
Chr2_7000001_7020000	Chr2	7000001	7020000	0.32823	2.52294
Chr2_9910001_9930000	Chr2	9910001	9930000	0.384326	2.2913
Chr2_11680001_11700000	Chr2	11680001	11700000	0.37493	2.69079
Chr2_11690001_11710000	Chr2	11690001	11710000	0.309961	2.80187
Chr2_29990001_30010000	Chr2	29990001	30010000	0.396408	2.12135
Chr2_31160001_31180000	Chr2	31160001	31180000	0.49051	2.105
Chr2_31170001_31190000	Chr2	31170001	31190000	0.480721	1.83978
Chr2_31410001_31430000	Chr2	31410001	31430000	0.410596	1.96766
Chr2_31460001_31480000	Chr2	31460001	31480000	0.480919	1.70336
Chr2_35750001_35770000	Chr2	35750001	35770000	0.413349	1.94703
Chr2_43730001_43750000	Chr2	43730001	43750000	0.450853	2.46912
Chr2_43740001_43760000	Chr2	43740001	43760000	0.413444	2.32176
Chr2_56940001_56960000	Chr2	56940001	56960000	0.371043	2.21785
Chr2_69890001_69910000	Chr2	69890001	69910000	0.378794	2.5064
Chr2_70140001_70160000	Chr2	70140001	70160000	0.408482	2.08063
Chr2_70810001_70830000	Chr2	70810001	70830000	0.469171	1.84195
Chr2_70820001_70840000	Chr2	70820001	70840000	0.512988	1.7476
Chr2_71030001_71050000	Chr2	71030001	71050000	0.511171	1.6873
Chr2_71040001_71060000	Chr2	71040001	71060000	0.531974	2.07379
Chr2_71050001_71070000	Chr2	71050001	71070000	0.508371	1.83986
Chr2_71080001_71100000	Chr2	71080001	71100000	0.499414	1.68156
Chr2_71090001_71110000	Chr2	71090001	71110000	0.489521	1.92572
Chr2_71820001_71840000	Chr2	71820001	71840000	0.365315	2.31075
Chr2_72380001_72400000	Chr2	72380001	72400000	0.554535	2.60144
Chr2_72430001_72450000	Chr2	72430001	72450000	0.375679	2.26195
Chr2_72590001_72610000	Chr2	72590001	72610000	0.371545	2.31098
Chr2_72870001_72890000	Chr2	72870001	72890000	0.345718	2.98683
Chr2_72880001_72900000	Chr2	72880001	72900000	0.396555	2.98074
Chr2_73450001_73470000	Chr2	73450001	73470000	0.399594	2.1196
Chr2_73880001_73900000	Chr2	73880001	73900000	0.354354	2.50493
Chr2_104630001_104650000	Chr2	104630001	104650000	0.328537	2.83211
Chr2_104680001_104700000	Chr2	104680001	104700000	0.338032	3.22023
Chr2_104690001_104710000	Chr2	104690001	104710000	0.377255	3.35953
Chr2_122280001_122300000	Chr2	122280001	122300000	0.432978	2.25993
Chr2_122320001_122340000	Chr2	122320001	122340000	0.488904	1.77604
Chr2_122670001_122690000	Chr2	122670001	122690000	0.389017	2.33453
Chr2_123410001_123430000	Chr2	123410001	123430000	0.327757	2.54298
Chr2_125020001_125040000	Chr2	125020001	125040000	0.394783	2.45329
Chr2_125060001_125080000	Chr2	125060001	125080000	0.358364	2.42789
Chr2_125340001_125360000	Chr2	125340001	125360000	0.464591	2.15257
Chr2_125350001_125370000	Chr2	125350001	125370000	0.372628	2.42498
Chr2_125390001_125410000	Chr2	125390001	125410000	0.5381	1.80998
Chr2_125420001_125440000	Chr2	125420001	125440000	0.637281	1.3844
Chr2_125470001_125490000	Chr2	125470001	125490000	0.887955	1.53688
Chr2_125480001_125500000	Chr2	125480001	125500000	0.862552	1.43508
Chr2_125490001_125510000	Chr2	125490001	125510000	0.723827	1.60715
Chr2_125500001_125520000	Chr2	125500001	125520000	0.705025	2.13502
Chr20_2110001_2130000	Chr20	2110001	2130000	0.364297	2.44404
Chr20_32540001_32560000	Chr20	32540001	32560000	0.35621	2.57667
Chr20_32550001_32570000	Chr20	32550001	32570000	0.403995	2.45801
Chr20_32560001_32580000	Chr20	32560001	32580000	0.405957	2.11473
Chr20_65100001_65120000	Chr20	65100001	65120000	0.352358	2.32552
Chr20_68240001_68260000	Chr20	68240001	68260000	0.324225	2.54483
Chr20_71160001_71180000	Chr20	71160001	71180000	0.369782	2.44488
Chr21_7650001_7670000	Chr21	7650001	7670000	0.395022	2.0829
Chr21_7760001_7780000	Chr21	7760001	7780000	0.298355	2.83331
Chr21_24120001_24140000	Chr21	24120001	24140000	0.432823	2.17064
Chr21_24130001_24150000	Chr21	24130001	24150000	0.417745	2.4293
Chr21_28630001_28650000	Chr21	28630001	28650000	0.525176	1.87748
Chr21_29100001_29120000	Chr21	29100001	29120000	0.365594	2.38839
Chr21_29110001_29130000	Chr21	29110001	29130000	0.380313	2.3625
Chr21_29170001_29190000	Chr21	29170001	29190000	0.518019	2.76013
Chr21_29180001_29200000	Chr21	29180001	29200000	0.50854	2.87385
Chr21_29560001_29580000	Chr21	29560001	29580000	0.336839	2.94888
Chr21_29580001_29600000	Chr21	29580001	29600000	0.300534	2.93879
Chr21_40480001_40500000	Chr21	40480001	40500000	0.33444	2.62623
Chr21_42280001_42300000	Chr21	42280001	42300000	0.439211	2.39049
Chr21_42290001_42310000	Chr21	42290001	42310000	0.398164	2.18223
Chr21_44340001_44360000	Chr21	44340001	44360000	0.358516	2.45228
Chr21_44440001_44460000	Chr21	44440001	44460000	0.340086	2.47845
Chr21_44480001_44500000	Chr21	44480001	44500000	0.399155	2.55066
Chr21_44490001_44510000	Chr21	44490001	44510000	0.306444	2.73791
Chr21_59990001_60010000	Chr21	59990001	60010000	0.304915	2.80767
Chr21_60350001_60370000	Chr21	60350001	60370000	0.367276	2.1902
Chr21_60390001_60410000	Chr21	60390001	60410000	0.410794	2.05039
Chr21_60420001_60440000	Chr21	60420001	60440000	0.483995	1.69838
Chr21_60440001_60460000	Chr21	60440001	60460000	0.507411	1.97817
Chr21_60450001_60470000	Chr21	60450001	60470000	0.59658	2.31447
Chr21_60460001_60480000	Chr21	60460001	60480000	0.615204	2.32403
Chr21_60470001_60490000	Chr21	60470001	60490000	0.614945	2.29089
Chr21_60480001_60500000	Chr21	60480001	60500000	0.607492	2.47238
Chr21_60490001_60510000	Chr21	60490001	60510000	0.558574	2.0774
Chr21_60840001_60860000	Chr21	60840001	60860000	0.352666	2.35235
Chr21_60870001_60890000	Chr21	60870001	60890000	0.364905	2.34965
Chr21_60880001_60900000	Chr21	60880001	60900000	0.376045	2.4186
Chr21_60890001_60910000	Chr21	60890001	60910000	0.381047	2.3743
Chr21_60900001_60920000	Chr21	60900001	60920000	0.371337	2.6842
Chr21_62970001_62990000	Chr21	62970001	62990000	0.425027	1.97488
Chr21_65820001_65840000	Chr21	65820001	65840000	0.323699	2.62065
Chr22_14300001_14320000	Chr22	14300001	14320000	0.288497	2.98946
Chr22_17890001_17910000	Chr22	17890001	17910000	0.413003	2.41037
Chr22_40830001_40850000	Chr22	40830001	40850000	0.358049	2.43071
Chr22_40910001_40930000	Chr22	40910001	40930000	0.356392	2.28822
Chr22_42560001_42580000	Chr22	42560001	42580000	0.320468	2.8332
Chr22_42570001_42590000	Chr22	42570001	42590000	0.334556	2.62023
Chr22_44030001_44050000	Chr22	44030001	44050000	0.439534	1.90326
Chr22_44110001_44130000	Chr22	44110001	44130000	0.357765	2.37301
Chr22_44120001_44140000	Chr22	44120001	44140000	0.379643	2.50486
Chr22_44130001_44150000	Chr22	44130001	44150000	0.430373	2.52505
Chr22_44140001_44160000	Chr22	44140001	44160000	0.401542	2.37639
Chr22_44150001_44170000	Chr22	44150001	44170000	0.372458	2.18052
Chr22_44240001_44260000	Chr22	44240001	44260000	0.307762	2.74708
Chr22_44360001_44380000	Chr22	44360001	44380000	0.467892	2.067
Chr22_44370001_44390000	Chr22	44370001	44390000	0.533877	2.25364
Chr22_45720001_45740000	Chr22	45720001	45740000	0.376438	2.20934
Chr22_45790001_45810000	Chr22	45790001	45810000	0.527863	2.25053
Chr22_45800001_45820000	Chr22	45800001	45820000	0.5063	1.78846
Chr22_46290001_46310000	Chr22	46290001	46310000	0.397614	2.18711
Chr22_47340001_47360000	Chr22	47340001	47360000	0.407454	1.98452
Chr22_54150001_54170000	Chr22	54150001	54170000	0.39331	2.11367
Chr22_56390001_56410000	Chr22	56390001	56410000	0.361868	2.56758
Chr22_56400001_56420000	Chr22	56400001	56420000	0.434529	2.30234
Chr22_57280001_57300000	Chr22	57280001	57300000	0.313987	3.73671
Chr22_59400001_59420000	Chr22	59400001	59420000	0.285795	3.28918
Chr22_59420001_59440000	Chr22	59420001	59440000	0.373417	2.55897
Chr22_59610001_59630000	Chr22	59610001	59630000	0.607706	1.96202
Chr22_59620001_59640000	Chr22	59620001	59640000	0.417598	1.95447
Chr22_59770001_59790000	Chr22	59770001	59790000	0.355392	2.34061
Chr22_59890001_59910000	Chr22	59890001	59910000	0.533547	1.88653
Chr23_40000001_40020000	Chr23	40000001	40020000	0.347918	2.67303
Chr23_40040001_40060000	Chr23	40040001	40060000	0.381517	2.2119
Chr23_40080001_40100000	Chr23	40080001	40100000	0.42409	2.93941
Chr23_40090001_40110000	Chr23	40090001	40110000	0.343859	2.82845
Chr24_1_20000	Chr24	1	20000	0.326713	3.02922
Chr24_70001_90000	Chr24	70001	90000	0.349164	3.06458
Chr24_80001_100000	Chr24	80001	100000	0.338005	2.91299
Chr24_90001_110000	Chr24	90001	110000	0.30106	2.81976
Chr24_100001_120000	Chr24	100001	120000	0.299367	3.18326
Chr24_530001_550000	Chr24	530001	550000	0.45267	2.8421
Chr24_540001_560000	Chr24	540001	560000	0.413828	2.60125
Chr24_550001_570000	Chr24	550001	570000	0.350962	2.54914
Chr24_560001_580000	Chr24	560001	580000	0.372589	2.39509
Chr24_570001_590000	Chr24	570001	590000	0.432568	2.32617
Chr24_580001_600000	Chr24	580001	600000	0.456374	2.27325
Chr24_9840001_9860000	Chr24	9840001	9860000	0.387939	2.72942
Chr24_9850001_9870000	Chr24	9850001	9870000	0.451672	2.55467
Chr24_13550001_13570000	Chr24	13550001	13570000	0.364118	2.58577
Chr24_27400001_27420000	Chr24	27400001	27420000	0.469328	2.34383
Chr24_27840001_27860000	Chr24	27840001	27860000	0.290499	3.35738
Chr24_30690001_30710000	Chr24	30690001	30710000	0.401586	2.38252
Chr24_30820001_30840000	Chr24	30820001	30840000	0.341205	2.73676
Chr24_40280001_40300000	Chr24	40280001	40300000	0.421689	2.15261
Chr24_45830001_45850000	Chr24	45830001	45850000	0.399128	2.06612
Chr24_46120001_46140000	Chr24	46120001	46140000	0.402115	2.06022
Chr24_46190001_46210000	Chr24	46190001	46210000	0.400408	2.02166
Chr24_46840001_46860000	Chr24	46840001	46860000	0.347215	2.62775
Chr24_46850001_46870000	Chr24	46850001	46870000	0.343115	2.68695
Chr24_49520001_49540000	Chr24	49520001	49540000	0.373837	2.70679
Chr24_49530001_49550000	Chr24	49530001	49550000	0.343479	2.38519
Chr24_49560001_49580000	Chr24	49560001	49580000	0.332185	2.95489
Chr24_49570001_49590000	Chr24	49570001	49590000	0.323067	2.71084
Chr24_49720001_49740000	Chr24	49720001	49740000	0.331746	2.55472
Chr24_50690001_50710000	Chr24	50690001	50710000	0.478896	2.40813
Chr24_50700001_50720000	Chr24	50700001	50720000	0.442023	1.98918
Chr24_51260001_51280000	Chr24	51260001	51280000	0.402378	2.57299
Chr24_51670001_51690000	Chr24	51670001	51690000	0.306908	2.80482
Chr24_51680001_51700000	Chr24	51680001	51700000	0.318002	2.99552
Chr24_56790001_56810000	Chr24	56790001	56810000	0.435273	2.41997
Chr24_56800001_56820000	Chr24	56800001	56820000	0.418186	1.9282
Chr24_57250001_57270000	Chr24	57250001	57270000	0.417211	2.67944
Chr24_57260001_57280000	Chr24	57260001	57280000	0.334706	2.45643
Chr24_60550001_60570000	Chr24	60550001	60570000	0.442515	2.70296
Chr24_60690001_60710000	Chr24	60690001	60710000	0.377911	2.69684
Chr24_60700001_60720000	Chr24	60700001	60720000	0.382285	2.50124
Chr24_61020001_61040000	Chr24	61020001	61040000	0.448928	2.5194
Chr24_61180001_61200000	Chr24	61180001	61200000	0.466322	1.94877
Chr25_8670001_8690000	Chr25	8670001	8690000	0.403724	2.1217
Chr25_10690001_10710000	Chr25	10690001	10710000	0.343003	2.41125
Chr25_14450001_14470000	Chr25	14450001	14470000	0.527594	1.69768
Chr25_14580001_14600000	Chr25	14580001	14600000	0.429249	2.1508
Chr25_14610001_14630000	Chr25	14610001	14630000	0.346158	3.13181
Chr25_14620001_14640000	Chr25	14620001	14640000	0.327439	2.73601
Chr25_14900001_14920000	Chr25	14900001	14920000	0.274381	3.43357
Chr25_27390001_27410000	Chr25	27390001	27410000	0.406527	2.256
Chr25_28440001_28460000	Chr25	28440001	28460000	0.385715	2.35323
Chr25_28870001_28890000	Chr25	28870001	28890000	0.356982	2.39227
Chr25_28970001_28990000	Chr25	28970001	28990000	0.405258	2.07777
Chr25_29140001_29160000	Chr25	29140001	29160000	0.446851	1.8721
Chr25_29150001_29170000	Chr25	29150001	29170000	0.43629	2.10575
Chr25_40020001_40040000	Chr25	40020001	40040000	0.325497	2.72105
Chr25_40100001_40120000	Chr25	40100001	40120000	0.361581	2.4565
Chr25_40110001_40130000	Chr25	40110001	40130000	0.386328	2.56704
Chr25_40120001_40140000	Chr25	40120001	40140000	0.345956	2.86746
Chr25_40130001_40150000	Chr25	40130001	40150000	0.362476	2.33685
Chr25_40230001_40250000	Chr25	40230001	40250000	0.33934	2.60244
Chr25_40240001_40260000	Chr25	40240001	40260000	0.382926	3.06473
Chr25_40480001_40500000	Chr25	40480001	40500000	0.307307	2.72741
Chr25_40660001_40680000	Chr25	40660001	40680000	0.29146	3.10729
Chr25_40670001_40690000	Chr25	40670001	40690000	0.338215	3.31664
Chr25_40680001_40700000	Chr25	40680001	40700000	0.337482	3.33024
Chr25_40960001_40980000	Chr25	40960001	40980000	0.297206	3.11298
Chr25_40970001_40990000	Chr25	40970001	40990000	0.292347	3.43475
Chr25_41010001_41030000	Chr25	41010001	41030000	0.319414	3.25033
Chr26_36630001_36650000	Chr26	36630001	36650000	0.327393	3.15529
Chr26_36640001_36660000	Chr26	36640001	36660000	0.391344	3.08467
Chr26_36650001_36670000	Chr26	36650001	36670000	0.329985	2.93214
Chr26_36690001_36710000	Chr26	36690001	36710000	0.360834	3.02572
Chr26_36700001_36720000	Chr26	36700001	36720000	0.345885	2.76421
Chr26_36840001_36860000	Chr26	36840001	36860000	0.322338	3.18307
Chr26_36850001_36870000	Chr26	36850001	36870000	0.365818	3.2002
Chr26_36860001_36880000	Chr26	36860001	36880000	0.367663	2.81879
Chr26_36880001_36900000	Chr26	36880001	36900000	0.354919	2.33192
Chr26_36890001_36910000	Chr26	36890001	36910000	0.359284	2.84194
Chr26_38710001_38730000	Chr26	38710001	38730000	0.349488	2.44832
Chr26_40010001_40030000	Chr26	40010001	40030000	0.348216	2.54258
Chr26_41970001_41990000	Chr26	41970001	41990000	0.36661	2.2614
Chr26_48540001_48560000	Chr26	48540001	48560000	0.535584	2.42174
Chr27_970001_990000	Chr27	970001	990000	0.308553	3.15753
Chr27_980001_1000000	Chr27	980001	1000000	0.324466	3.03234
Chr27_1170001_1190000	Chr27	1170001	1190000	0.411207	2.09057
Chr28_18320001_18340000	Chr28	18320001	18340000	0.405465	2.42917
Chr28_18360001_18380000	Chr28	18360001	18380000	0.457082	2.32976
Chr28_18370001_18390000	Chr28	18370001	18390000	0.389957	3.00763
Chr28_18380001_18400000	Chr28	18380001	18400000	0.335188	3.52799
Chr28_18780001_18800000	Chr28	18780001	18800000	0.365952	3.22047
Chr28_18790001_18810000	Chr28	18790001	18810000	0.348917	2.96714
Chr28_24830001_24850000	Chr28	24830001	24850000	0.327289	3.06733
Chr28_24980001_25000000	Chr28	24980001	25000000	0.399086	2.56338
Chr28_25020001_25040000	Chr28	25020001	25040000	0.417555	2.00979
Chr28_25330001_25350000	Chr28	25330001	25350000	0.40016	2.24942
Chr28_25370001_25390000	Chr28	25370001	25390000	0.354919	2.66997
Chr28_25870001_25890000	Chr28	25870001	25890000	0.369406	2.32198
Chr28_26040001_26060000	Chr28	26040001	26060000	0.463826	2.01429
Chr28_26330001_26350000	Chr28	26330001	26350000	0.373082	2.26439
Chr28_26460001_26480000	Chr28	26460001	26480000	0.365467	2.28987
Chr28_29150001_29170000	Chr28	29150001	29170000	0.359708	2.39162
Chr29_13020001_13040000	Chr29	13020001	13040000	0.435095	2.10441
Chr29_13030001_13050000	Chr29	13030001	13050000	0.358524	2.56383
Chr29_26290001_26310000	Chr29	26290001	26310000	0.424537	2.09131
Chr29_42970001_42990000	Chr29	42970001	42990000	0.398196	2.0858
Chr29_43450001_43470000	Chr29	43450001	43470000	0.414354	1.94073
Chr29_43480001_43500000	Chr29	43480001	43500000	0.584968	1.6907
Chr29_43490001_43510000	Chr29	43490001	43510000	0.523796	1.68157
Chr29_43540001_43560000	Chr29	43540001	43560000	0.489587	1.69843
Chr29_47200001_47220000	Chr29	47200001	47220000	0.515883	1.69207
Chr3_10630001_10650000	Chr3	10630001	10650000	0.37268	2.19025
Chr3_10640001_10660000	Chr3	10640001	10660000	0.388719	2.24532
Chr3_16830001_16850000	Chr3	16830001	16850000	0.364735	2.39065
Chr3_16840001_16860000	Chr3	16840001	16860000	0.45666	2.11452
Chr3_18140001_18160000	Chr3	18140001	18160000	0.412201	2.18434
Chr3_20020001_20040000	Chr3	20020001	20040000	0.55136	1.76147
Chr3_20030001_20050000	Chr3	20030001	20050000	0.517509	1.68131
Chr3_20130001_20150000	Chr3	20130001	20150000	0.475068	1.79084
Chr3_36630001_36650000	Chr3	36630001	36650000	0.464107	1.77809
Chr3_36640001_36660000	Chr3	36640001	36660000	0.444583	1.94245
Chr3_37370001_37390000	Chr3	37370001	37390000	0.325606	2.55066
Chr3_37900001_37920000	Chr3	37900001	37920000	0.351087	2.33342
Chr3_38360001_38380000	Chr3	38360001	38380000	0.447129	1.95528
Chr3_38370001_38390000	Chr3	38370001	38390000	0.420043	2.09197
Chr3_38450001_38470000	Chr3	38450001	38470000	0.322677	2.60038
Chr3_38460001_38480000	Chr3	38460001	38480000	0.346765	2.46206
Chr3_38870001_38890000	Chr3	38870001	38890000	0.342442	2.52164
Chr3_44680001_44700000	Chr3	44680001	44700000	0.53774	1.78296
Chr3_54800001_54820000	Chr3	54800001	54820000	0.363877	2.53574
Chr3_57510001_57530000	Chr3	57510001	57530000	0.501642	1.75851
Chr3_57600001_57620000	Chr3	57600001	57620000	0.487601	2.08426
Chr3_57610001_57630000	Chr3	57610001	57630000	0.474194	1.80297
Chr3_62420001_62440000	Chr3	62420001	62440000	0.35268	2.51959
Chr3_62430001_62450000	Chr3	62430001	62450000	0.40535	2.80897
Chr3_68240001_68260000	Chr3	68240001	68260000	0.351892	2.32571
Chr3_68320001_68340000	Chr3	68320001	68340000	0.373865	2.32977
Chr3_77820001_77840000	Chr3	77820001	77840000	0.43202	2.01816
Chr3_81020001_81040000	Chr3	81020001	81040000	0.383856	2.07911
Chr3_81040001_81060000	Chr3	81040001	81060000	0.373878	2.30509
Chr3_84590001_84610000	Chr3	84590001	84610000	0.472113	1.92016
Chr3_84800001_84820000	Chr3	84800001	84820000	0.56168	2.38523
Chr3_84810001_84830000	Chr3	84810001	84830000	0.532148	1.97
Chr3_84840001_84860000	Chr3	84840001	84860000	0.517069	2.04446
Chr3_84850001_84870000	Chr3	84850001	84870000	0.399412	2.12909
Chr3_89640001_89660000	Chr3	89640001	89660000	0.378109	2.32129
Chr4_1590001_1610000	Chr4	1590001	1610000	0.32753	2.63923
Chr4_9970001_9990000	Chr4	9970001	9990000	0.328122	2.72456
Chr4_10090001_10110000	Chr4	10090001	10110000	0.475369	2.24357
Chr4_10360001_10380000	Chr4	10360001	10380000	0.32746	2.61393
Chr4_10370001_10390000	Chr4	10370001	10390000	0.31871	2.82415
Chr4_10410001_10430000	Chr4	10410001	10430000	0.468072	2.018
Chr4_10420001_10440000	Chr4	10420001	10440000	0.531853	2.32925
Chr4_10430001_10450000	Chr4	10430001	10450000	0.457166	2.05908
Chr4_10450001_10470000	Chr4	10450001	10470000	0.419864	2.33509
Chr4_10480001_10500000	Chr4	10480001	10500000	0.395538	2.70527
Chr4_10600001_10620000	Chr4	10600001	10620000	0.341648	2.44206
Chr4_11800001_11820000	Chr4	11800001	11820000	0.464394	1.76268
Chr4_11810001_11830000	Chr4	11810001	11830000	0.576766	1.711
Chr4_11820001_11840000	Chr4	11820001	11840000	0.507232	1.75654
Chr4_11840001_11860000	Chr4	11840001	11860000	0.435937	1.8837
Chr4_11850001_11870000	Chr4	11850001	11870000	0.417647	2.10166
Chr4_18340001_18360000	Chr4	18340001	18360000	0.366112	2.78794
Chr4_18350001_18370000	Chr4	18350001	18370000	0.365902	2.68813
Chr4_19540001_19560000	Chr4	19540001	19560000	0.333249	2.49261
Chr4_20210001_20230000	Chr4	20210001	20230000	0.561769	2.35529
Chr4_20220001_20240000	Chr4	20220001	20240000	0.38214	2.13636
Chr4_20800001_20820000	Chr4	20800001	20820000	0.445353	2.25361
Chr4_20860001_20880000	Chr4	20860001	20880000	0.370904	2.30421
Chr4_20870001_20890000	Chr4	20870001	20890000	0.36959	2.65567
Chr4_21630001_21650000	Chr4	21630001	21650000	0.440046	1.88145
Chr4_21960001_21980000	Chr4	21960001	21980000	0.31718	2.66693
Chr4_21970001_21990000	Chr4	21970001	21990000	0.391854	2.5716
Chr4_21980001_22000000	Chr4	21980001	22000000	0.399631	2.525
Chr4_22750001_22770000	Chr4	22750001	22770000	0.415285	2.61936
Chr4_22760001_22780000	Chr4	22760001	22780000	0.408973	2.13724
Chr4_22970001_22990000	Chr4	22970001	22990000	0.359319	2.98878
Chr4_22980001_23000000	Chr4	22980001	23000000	0.371322	2.86197
Chr4_22990001_23010000	Chr4	22990001	23010000	0.354996	2.2817
Chr4_23070001_23090000	Chr4	23070001	23090000	0.345857	2.36557
Chr4_26210001_26230000	Chr4	26210001	26230000	0.405996	2.48663
Chr4_26220001_26240000	Chr4	26220001	26240000	0.356185	2.44524
Chr4_26270001_26290000	Chr4	26270001	26290000	0.35122	2.62436
Chr4_26280001_26300000	Chr4	26280001	26300000	0.359367	2.31569
Chr4_26380001_26400000	Chr4	26380001	26400000	0.356166	2.75686
Chr4_26390001_26410000	Chr4	26390001	26410000	0.345193	2.7884
Chr4_26860001_26880000	Chr4	26860001	26880000	0.325738	2.60274
Chr4_27520001_27540000	Chr4	27520001	27540000	0.462471	1.96704
Chr4_29820001_29840000	Chr4	29820001	29840000	0.413495	2.21069
Chr4_29870001_29890000	Chr4	29870001	29890000	0.400539	1.99656
Chr4_30190001_30210000	Chr4	30190001	30210000	0.375939	2.20467
Chr4_30430001_30450000	Chr4	30430001	30450000	0.378869	2.522
Chr4_30670001_30690000	Chr4	30670001	30690000	0.436451	1.91563
Chr4_30700001_30720000	Chr4	30700001	30720000	0.424019	2.02111
Chr4_59340001_59360000	Chr4	59340001	59360000	0.409625	2.37056
Chr4_104720001_104740000	Chr4	104720001	104740000	0.3717	2.73176
Chr4_104730001_104750000	Chr4	104730001	104750000	0.386516	2.78152
Chr4_114750001_114770000	Chr4	114750001	114770000	0.298619	3.00801
Chr4_115340001_115360000	Chr4	115340001	115360000	0.407897	1.96712
Chr5_13630001_13650000	Chr5	13630001	13650000	0.330364	2.80855
Chr5_13940001_13960000	Chr5	13940001	13960000	0.457054	1.81856
Chr5_14010001_14030000	Chr5	14010001	14030000	0.40816	2.05372
Chr5_14470001_14490000	Chr5	14470001	14490000	0.433239	2.9877
Chr5_14480001_14500000	Chr5	14480001	14500000	0.36683	2.72945
Chr5_23470001_23490000	Chr5	23470001	23490000	0.387224	2.35225
Chr5_26540001_26560000	Chr5	26540001	26560000	0.379756	2.38566
Chr5_26870001_26890000	Chr5	26870001	26890000	0.365749	2.31887
Chr5_27120001_27140000	Chr5	27120001	27140000	0.48944	2.07026
Chr5_27130001_27150000	Chr5	27130001	27150000	0.418643	2.19646
Chr5_27380001_27400000	Chr5	27380001	27400000	0.325538	2.58967
Chr5_27400001_27420000	Chr5	27400001	27420000	0.362364	2.22694
Chr5_27410001_27430000	Chr5	27410001	27430000	0.382196	2.32983
Chr5_27820001_27840000	Chr5	27820001	27840000	0.424871	2.4925
Chr5_28180001_28200000	Chr5	28180001	28200000	0.395766	2.05385
Chr5_28230001_28250000	Chr5	28230001	28250000	0.451488	2.02574
Chr5_28240001_28260000	Chr5	28240001	28260000	0.464749	2.08069
Chr5_28560001_28580000	Chr5	28560001	28580000	0.552447	1.87457
Chr5_28960001_28980000	Chr5	28960001	28980000	0.427869	1.93194
Chr5_29720001_29740000	Chr5	29720001	29740000	0.365359	2.5475
Chr5_29730001_29750000	Chr5	29730001	29750000	0.42394	2.24438
Chr5_30030001_30050000	Chr5	30030001	30050000	0.441405	1.91853
Chr5_30720001_30740000	Chr5	30720001	30740000	0.320846	2.67616
Chr5_31300001_31320000	Chr5	31300001	31320000	0.562133	1.72221
Chr5_31310001_31330000	Chr5	31310001	31330000	0.508904	1.91317
Chr5_31350001_31370000	Chr5	31350001	31370000	0.362752	2.49287
Chr5_31360001_31380000	Chr5	31360001	31380000	0.433348	2.24164
Chr5_31410001_31430000	Chr5	31410001	31430000	0.307819	3.0679
Chr5_32000001_32020000	Chr5	32000001	32020000	0.324055	2.56954
Chr5_36260001_36280000	Chr5	36260001	36280000	0.309069	2.94451
Chr5_36270001_36290000	Chr5	36270001	36290000	0.319388	2.91035
Chr5_36470001_36490000	Chr5	36470001	36490000	0.354666	2.38275
Chr5_37010001_37030000	Chr5	37010001	37030000	0.424898	2.36094
Chr5_40800001_40820000	Chr5	40800001	40820000	0.39601	2.30888
Chr5_50930001_50950000	Chr5	50930001	50950000	0.407315	2.03767
Chr5_52520001_52540000	Chr5	52520001	52540000	0.313018	2.72733
Chr5_52710001_52730000	Chr5	52710001	52730000	0.489715	1.68018
Chr5_52760001_52780000	Chr5	52760001	52780000	0.40691	2.11334
Chr5_52870001_52890000	Chr5	52870001	52890000	0.313551	3.32879
Chr5_52880001_52900000	Chr5	52880001	52900000	0.287979	3.75122
Chr5_52900001_52920000	Chr5	52900001	52920000	0.370298	3.91629
Chr5_52910001_52930000	Chr5	52910001	52930000	0.409893	3.44895
Chr5_52920001_52940000	Chr5	52920001	52940000	0.499912	2.92077
Chr5_52930001_52950000	Chr5	52930001	52950000	0.469589	2.48562
Chr5_52940001_52960000	Chr5	52940001	52960000	0.380914	2.26587
Chr5_53050001_53070000	Chr5	53050001	53070000	0.396424	2.43959
Chr5_53130001_53150000	Chr5	53130001	53150000	0.343528	2.51639
Chr5_53480001_53500000	Chr5	53480001	53500000	0.337006	2.70307
Chr5_54260001_54280000	Chr5	54260001	54280000	0.322127	2.64985
Chr5_54320001_54340000	Chr5	54320001	54340000	0.330848	2.67616
Chr5_56730001_56750000	Chr5	56730001	56750000	0.547036	1.95044
Chr5_56740001_56760000	Chr5	56740001	56760000	0.476174	1.71671
Chr5_56760001_56780000	Chr5	56760001	56780000	0.579654	1.53995
Chr5_56780001_56800000	Chr5	56780001	56800000	0.513962	1.68867
Chr5_56790001_56810000	Chr5	56790001	56810000	0.48353	1.8573
Chr5_61320001_61340000	Chr5	61320001	61340000	0.370617	2.7844
Chr5_61330001_61350000	Chr5	61330001	61350000	0.362426	2.62083
Chr5_78590001_78610000	Chr5	78590001	78610000	0.397954	2.61934
Chr5_93060001_93080000	Chr5	93060001	93080000	0.375874	2.17868
Chr5_94930001_94950000	Chr5	94930001	94950000	0.321564	2.97314
Chr5_94940001_94960000	Chr5	94940001	94960000	0.297165	2.93118
Chr5_103680001_103700000	Chr5	103680001	103700000	0.455638	2.13899
Chr5_103700001_103720000	Chr5	103700001	103720000	0.467654	2.07796
Chr5_105710001_105730000	Chr5	105710001	105730000	0.40821	1.95912
Chr5_105720001_105740000	Chr5	105720001	105740000	0.410181	2.01929
Chr5_105820001_105840000	Chr5	105820001	105840000	0.326159	2.66518
Chr5_107090001_107110000	Chr5	107090001	107110000	0.398955	2.44608
Chr5_107100001_107120000	Chr5	107100001	107120000	0.42949	2.11293
Chr5_111810001_111830000	Chr5	111810001	111830000	0.414478	2.0826
Chr5_111820001_111840000	Chr5	111820001	111840000	0.535465	1.96148
Chr5_112440001_112460000	Chr5	112440001	112460000	0.432375	1.89668
Chr5_112450001_112470000	Chr5	112450001	112470000	0.455183	2.0683
Chr5_112460001_112480000	Chr5	112460001	112480000	0.436655	1.95876
Chr5_113190001_113210000	Chr5	113190001	113210000	0.403669	2.0675
Chr5_113210001_113230000	Chr5	113210001	113230000	0.456094	1.98425
Chr5_113350001_113370000	Chr5	113350001	113370000	0.430041	2.52196
Chr5_113360001_113380000	Chr5	113360001	113380000	0.409399	2.18526
Chr5_113510001_113530000	Chr5	113510001	113530000	0.399881	2.13849
Chr5_114490001_114510000	Chr5	114490001	114510000	0.318949	2.71996
Chr5_114520001_114540000	Chr5	114520001	114540000	0.293875	3.07536
Chr5_114530001_114550000	Chr5	114530001	114550000	0.321482	3.235
Chr5_114540001_114560000	Chr5	114540001	114560000	0.3219	2.73213
Chr5_114650001_114670000	Chr5	114650001	114670000	0.415401	2.17282
Chr6_14030001_14050000	Chr6	14030001	14050000	0.367241	2.89019
Chr6_14040001_14060000	Chr6	14040001	14060000	0.416312	2.88631
Chr6_25270001_25290000	Chr6	25270001	25290000	0.419988	2.03221
Chr6_25280001_25300000	Chr6	25280001	25300000	0.422294	2.12922
Chr6_25330001_25350000	Chr6	25330001	25350000	0.481734	1.96112
Chr6_25370001_25390000	Chr6	25370001	25390000	0.604534	2.12773
Chr6_25380001_25400000	Chr6	25380001	25400000	0.63794	2.2304
Chr6_25390001_25410000	Chr6	25390001	25410000	0.633767	1.79957
Chr6_25400001_25420000	Chr6	25400001	25420000	0.618761	2.13473
Chr6_26840001_26860000	Chr6	26840001	26860000	0.405725	2.48087
Chr6_26910001_26930000	Chr6	26910001	26930000	0.463566	1.99674
Chr6_30100001_30120000	Chr6	30100001	30120000	0.406439	2.15174
Chr6_30110001_30130000	Chr6	30110001	30130000	0.554709	2.17631
Chr6_30120001_30140000	Chr6	30120001	30140000	0.66078	2.26361
Chr6_30140001_30160000	Chr6	30140001	30160000	0.657541	2.51441
Chr6_30150001_30170000	Chr6	30150001	30170000	0.509101	1.87404
Chr6_30320001_30340000	Chr6	30320001	30340000	0.390102	2.31862
Chr6_30510001_30530000	Chr6	30510001	30530000	0.349498	2.36787
Chr6_30520001_30540000	Chr6	30520001	30540000	0.458129	2.04684
Chr6_32550001_32570000	Chr6	32550001	32570000	0.342119	2.65546
Chr6_32560001_32580000	Chr6	32560001	32580000	0.475212	3.12198
Chr6_32570001_32590000	Chr6	32570001	32590000	0.542104	2.28516
Chr6_32670001_32690000	Chr6	32670001	32690000	0.3286	2.50102
Chr6_34910001_34930000	Chr6	34910001	34930000	0.460868	1.89676
Chr6_34920001_34940000	Chr6	34920001	34940000	0.478361	2.26409
Chr6_34930001_34950000	Chr6	34930001	34950000	0.370596	2.24392
Chr6_35240001_35260000	Chr6	35240001	35260000	0.420918	2.39732
Chr6_35250001_35270000	Chr6	35250001	35270000	0.488803	2.43501
Chr6_35260001_35280000	Chr6	35260001	35280000	0.436124	2.06135
Chr6_36400001_36420000	Chr6	36400001	36420000	0.372737	2.77969
Chr6_36410001_36430000	Chr6	36410001	36430000	0.38736	2.7673
Chr6_51740001_51760000	Chr6	51740001	51760000	0.41942	2.11269
Chr7_4300001_4320000	Chr7	4300001	4320000	0.367351	2.44564
Chr7_4310001_4330000	Chr7	4310001	4330000	0.39323	2.3287
Chr7_17120001_17140000	Chr7	17120001	17140000	0.317512	2.60771
Chr7_17130001_17150000	Chr7	17130001	17150000	0.334644	2.46917
Chr7_35430001_35450000	Chr7	35430001	35450000	0.366742	2.45972
Chr7_35890001_35910000	Chr7	35890001	35910000	0.372386	2.47614
Chr7_101320001_101340000	Chr7	101320001	101340000	0.393653	2.19673
Chr7_101330001_101350000	Chr7	101330001	101350000	0.413328	2.72419
Chr7_101340001_101360000	Chr7	101340001	101360000	0.39388	2.77801
Chr7_101430001_101450000	Chr7	101430001	101450000	0.385116	2.9093
Chr7_101440001_101460000	Chr7	101440001	101460000	0.56363	2.74839
Chr7_101450001_101470000	Chr7	101450001	101470000	0.561011	2.0778
Chr7_101620001_101640000	Chr7	101620001	101640000	0.395231	2.92675
Chr7_101630001_101650000	Chr7	101630001	101650000	0.367283	2.9087
Chr7_101640001_101660000	Chr7	101640001	101660000	0.387212	2.59936
Chr7_101840001_101860000	Chr7	101840001	101860000	0.337081	2.60666
Chr7_101850001_101870000	Chr7	101850001	101870000	0.438008	2.0759
Chr7_107360001_107380000	Chr7	107360001	107380000	0.333062	2.46509
Chr8_7430001_7450000	Chr8	7430001	7450000	0.397291	2.06746
Chr8_7440001_7460000	Chr8	7440001	7460000	0.396449	2.46909
Chr8_31610001_31630000	Chr8	31610001	31630000	0.46838	1.97385
Chr8_31620001_31640000	Chr8	31620001	31640000	0.486657	2.33294
Chr8_32610001_32630000	Chr8	32610001	32630000	0.478589	2.12108
Chr8_32670001_32690000	Chr8	32670001	32690000	0.44217	2.37761
Chr8_32680001_32700000	Chr8	32680001	32700000	0.432816	2.07875
Chr8_33040001_33060000	Chr8	33040001	33060000	0.334035	2.56216
Chr8_33180001_33200000	Chr8	33180001	33200000	0.397956	2.09722
Chr8_38730001_38750000	Chr8	38730001	38750000	0.347164	2.35223
Chr8_51390001_51410000	Chr8	51390001	51410000	0.351956	2.63123
Chr8_94250001_94270000	Chr8	94250001	94270000	0.355178	2.76653
Chr8_94260001_94280000	Chr8	94260001	94280000	0.400092	2.88022
Chr8_94970001_94990000	Chr8	94970001	94990000	0.447445	2.61789
Chr8_94980001_95000000	Chr8	94980001	95000000	0.413991	1.95118
Chr8_99690001_99710000	Chr8	99690001	99710000	0.467013	2.6581
Chr8_99700001_99720000	Chr8	99700001	99720000	0.485139	3.12821
Chr8_99710001_99730000	Chr8	99710001	99730000	0.331441	2.50134
Chr8_101670001_101690000	Chr8	101670001	101690000	0.420847	2.98005
Chr8_101680001_101700000	Chr8	101680001	101700000	0.380214	2.94591
Chr8_104250001_104270000	Chr8	104250001	104270000	0.39258	2.42885
Chr8_104320001_104340000	Chr8	104320001	104340000	0.351216	2.57114
Chr8_104330001_104350000	Chr8	104330001	104350000	0.373486	2.62636
Chr8_104340001_104360000	Chr8	104340001	104360000	0.337697	2.56523
Chr8_112780001_112800000	Chr8	112780001	112800000	0.32688	3.13723
Chr8_112790001_112810000	Chr8	112790001	112810000	0.331961	2.73627
Chr9_7630001_7650000	Chr9	7630001	7650000	0.316151	2.89216
Chr9_7660001_7680000	Chr9	7660001	7680000	0.334055	3.06667
Chr9_7670001_7690000	Chr9	7670001	7690000	0.405768	2.17061
Chr9_10180001_10200000	Chr9	10180001	10200000	0.409806	1.96418
Chr9_10310001_10330000	Chr9	10310001	10330000	0.384775	2.46649
Chr9_10320001_10340000	Chr9	10320001	10340000	0.394066	2.05964
Chr9_10810001_10830000	Chr9	10810001	10830000	0.398394	2.1766
Chr9_10860001_10880000	Chr9	10860001	10880000	0.36642	2.47092
Chr9_10870001_10890000	Chr9	10870001	10890000	0.348954	2.38833
Chr9_12310001_12330000	Chr9	12310001	12330000	0.357672	2.41411
Chr9_12980001_13000000	Chr9	12980001	13000000	0.316823	2.6918
Chr9_12990001_13010000	Chr9	12990001	13010000	0.373325	2.45677
Chr9_13000001_13020000	Chr9	13000001	13020000	0.544435	2.39844
Chr9_13010001_13030000	Chr9	13010001	13030000	0.527267	2.34739
Chr9_13380001_13400000	Chr9	13380001	13400000	0.379604	2.68817
Chr9_13390001_13410000	Chr9	13390001	13410000	0.333566	2.68239
Chr9_13710001_13730000	Chr9	13710001	13730000	0.336933	2.45033
Chr9_17670001_17690000	Chr9	17670001	17690000	0.39192	2.03546
Chr9_17910001_17930000	Chr9	17910001	17930000	0.355653	3.15559
Chr9_17920001_17940000	Chr9	17920001	17940000	0.349994	3.61605
Chr9_28790001_28810000	Chr9	28790001	28810000	0.371097	2.21084
Chr9_30230001_30250000	Chr9	30230001	30250000	0.42741	2.43788
Chr9_59280001_59300000	Chr9	59280001	59300000	0.424235	2.32
Chr9_59290001_59310000	Chr9	59290001	59310000	0.42182	2.65838
Chr9_76340001_76360000	Chr9	76340001	76360000	0.402498	2.02133
Chr9_76350001_76370000	Chr9	76350001	76370000	0.401107	2.77222
Chr9_76410001_76430000	Chr9	76410001	76430000	0.348632	2.53695
Chr9_76420001_76440000	Chr9	76420001	76440000	0.33318	2.65285
Chr9_76450001_76470000	Chr9	76450001	76470000	0.386014	2.08954
Chr9_76460001_76480000	Chr9	76460001	76480000	0.553113	2.56004
Chr9_76470001_76490000	Chr9	76470001	76490000	0.569605	1.99598
Chr9_77790001_77810000	Chr9	77790001	77810000	0.35833	2.273
Chr9_84250001_84270000	Chr9	84250001	84270000	0.372085	2.5208
Chr9_96770001_96790000	Chr9	96770001	96790000	0.359599	2.23714
Chr9_96780001_96800000	Chr9	96780001	96800000	0.430582	2.09489
Chr9_96790001_96810000	Chr9	96790001	96810000	0.492034	1.81974
Chr9_96800001_96820000	Chr9	96800001	96820000	0.453029	2.01288
Chr9_96830001_96850000	Chr9	96830001	96850000	0.422475	2.34982
Chr9_96840001_96860000	Chr9	96840001	96860000	0.386385	2.28157
Chr9_98830001_98850000	Chr9	98830001	98850000	0.313703	2.80531
ChrX_230001_250000	ChrX	230001	250000	0.593027	1.58001
ChrX_270001_290000	ChrX	270001	290000	0.488706	2.0178
ChrX_280001_300000	ChrX	280001	300000	0.535402	2.33037
ChrX_290001_310000	ChrX	290001	310000	0.541753	1.98101
ChrX_300001_320000	ChrX	300001	320000	0.54902	1.6482
ChrX_310001_330000	ChrX	310001	330000	0.54896	1.8126
ChrX_320001_340000	ChrX	320001	340000	0.515281	1.77402
ChrX_490001_510000	ChrX	490001	510000	0.350245	2.38908
ChrX_680001_700000	ChrX	680001	700000	0.574494	1.73893
ChrX_690001_710000	ChrX	690001	710000	0.451126	2.24341
ChrX_700001_720000	ChrX	700001	720000	0.459747	2.11255
ChrX_710001_730000	ChrX	710001	730000	0.554002	1.9457
ChrX_980001_1000000	ChrX	980001	1000000	0.375672	2.55754
ChrX_990001_1010000	ChrX	990001	1010000	0.404586	2.34497
ChrX_1130001_1150000	ChrX	1130001	1150000	0.510081	1.77998
ChrX_1140001_1160000	ChrX	1140001	1160000	0.554595	1.66681
ChrX_1170001_1190000	ChrX	1170001	1190000	0.382901	2.37601
ChrX_1180001_1200000	ChrX	1180001	1200000	0.377238	2.51802
ChrX_1890001_1910000	ChrX	1890001	1910000	0.49177	1.75576
ChrX_1930001_1950000	ChrX	1930001	1950000	0.404134	2.70075
ChrX_1940001_1960000	ChrX	1940001	1960000	0.474837	2.42869
ChrX_2360001_2380000	ChrX	2360001	2380000	0.496659	1.72334
ChrX_2570001_2590000	ChrX	2570001	2590000	0.481359	1.83543
ChrX_2580001_2600000	ChrX	2580001	2600000	0.525829	2.13802
ChrX_2590001_2610000	ChrX	2590001	2610000	0.54975	2.41607
ChrX_3410001_3430000	ChrX	3410001	3430000	0.390761	2.07603
ChrX_3560001_3580000	ChrX	3560001	3580000	0.500709	2.34707
ChrX_3570001_3590000	ChrX	3570001	3590000	0.492991	2.22984
ChrX_4610001_4630000	ChrX	4610001	4630000	0.49246	2.42678
ChrX_4620001_4640000	ChrX	4620001	4640000	0.466853	3.02282
ChrX_10590001_10610000	ChrX	10590001	10610000	0.426418	2.40597
ChrX_10600001_10620000	ChrX	10600001	10620000	0.403537	2.01738
ChrX_23220001_23240000	ChrX	23220001	23240000	0.491044	1.66552
ChrX_23360001_23380000	ChrX	23360001	23380000	0.500378	1.7284
ChrX_23420001_23440000	ChrX	23420001	23440000	0.33323	3.60622
ChrX_23830001_23850000	ChrX	23830001	23850000	0.477159	1.74951
ChrX_24820001_24840000	ChrX	24820001	24840000	0.515918	1.77616
ChrX_25130001_25150000	ChrX	25130001	25150000	0.381577	2.27953
ChrX_25330001_25350000	ChrX	25330001	25350000	0.464	2.03018
ChrX_25630001_25650000	ChrX	25630001	25650000	0.475298	1.7346
ChrX_26560001_26580000	ChrX	26560001	26580000	0.399199	2.11194
ChrX_26570001_26590000	ChrX	26570001	26590000	0.486861	1.96704
ChrX_26980001_27000000	ChrX	26980001	27000000	0.417259	2.1167
ChrX_27010001_27030000	ChrX	27010001	27030000	0.349457	2.44916
ChrX_27020001_27040000	ChrX	27020001	27040000	0.340068	2.44928
ChrX_27220001_27240000	ChrX	27220001	27240000	0.346379	2.35529
ChrX_27250001_27270000	ChrX	27250001	27270000	0.521837	2.33201
ChrX_27260001_27280000	ChrX	27260001	27280000	0.625549	1.81072
ChrX_27270001_27290000	ChrX	27270001	27290000	0.547005	1.84931
ChrX_27640001_27660000	ChrX	27640001	27660000	0.683882	1.72525
ChrX_27650001_27670000	ChrX	27650001	27670000	0.645944	1.4208
ChrX_29120001_29140000	ChrX	29120001	29140000	0.451948	2.25215
ChrX_29340001_29360000	ChrX	29340001	29360000	0.732155	1.49016
ChrX_29420001_29440000	ChrX	29420001	29440000	0.377674	2.14819
ChrX_29450001_29470000	ChrX	29450001	29470000	0.385682	2.17886
ChrX_29520001_29540000	ChrX	29520001	29540000	0.465891	2.01104
ChrX_30020001_30040000	ChrX	30020001	30040000	0.42259	1.89494
ChrX_30080001_30100000	ChrX	30080001	30100000	0.610564	1.67087
ChrX_30490001_30510000	ChrX	30490001	30510000	0.424265	2.13044
ChrX_30570001_30590000	ChrX	30570001	30590000	0.466082	2.17032
ChrX_30580001_30600000	ChrX	30580001	30600000	0.446897	2.39007
ChrX_30590001_30610000	ChrX	30590001	30610000	0.33843	2.48002
ChrX_30620001_30640000	ChrX	30620001	30640000	0.398048	2.29543
ChrX_31260001_31280000	ChrX	31260001	31280000	0.513297	1.86819
ChrX_31270001_31290000	ChrX	31270001	31290000	0.528516	1.77211
ChrX_31300001_31320000	ChrX	31300001	31320000	0.420804	2.35038
ChrX_31530001_31550000	ChrX	31530001	31550000	0.528611	1.76026
ChrX_31680001_31700000	ChrX	31680001	31700000	0.388583	2.05784
ChrX_32330001_32350000	ChrX	32330001	32350000	0.507361	1.9045
ChrX_32340001_32360000	ChrX	32340001	32360000	0.482749	1.77214
ChrX_32940001_32960000	ChrX	32940001	32960000	0.373819	2.29268
ChrX_33850001_33870000	ChrX	33850001	33870000	0.510492	2.38482
ChrX_34450001_34470000	ChrX	34450001	34470000	0.501719	1.65289
ChrX_35300001_35320000	ChrX	35300001	35320000	0.506277	1.71752
ChrX_44210001_44230000	ChrX	44210001	44230000	0.556062	1.57791
ChrX_44730001_44750000	ChrX	44730001	44750000	0.452923	1.84731
ChrX_45270001_45290000	ChrX	45270001	45290000	0.629114	1.4986
ChrX_45280001_45300000	ChrX	45280001	45300000	0.575192	1.58643
ChrX_45320001_45340000	ChrX	45320001	45340000	0.556756	1.55939
ChrX_45340001_45360000	ChrX	45340001	45360000	0.560167	1.59691
ChrX_45350001_45370000	ChrX	45350001	45370000	0.49054	1.70427
ChrX_45380001_45400000	ChrX	45380001	45400000	0.550175	1.88976
ChrX_45390001_45410000	ChrX	45390001	45410000	0.528943	1.87761
ChrX_45400001_45420000	ChrX	45400001	45420000	0.51632	1.88462
ChrX_45410001_45430000	ChrX	45410001	45430000	0.539554	1.72637
ChrX_45420001_45440000	ChrX	45420001	45440000	0.548761	1.69053
ChrX_45430001_45450000	ChrX	45430001	45450000	0.580799	1.77978
ChrX_45440001_45460000	ChrX	45440001	45460000	0.594633	1.62694
ChrX_45480001_45500000	ChrX	45480001	45500000	0.580811	1.53395
ChrX_45490001_45510000	ChrX	45490001	45510000	0.602783	1.62687
ChrX_45500001_45520000	ChrX	45500001	45520000	0.622663	1.91857
ChrX_45560001_45580000	ChrX	45560001	45580000	0.526724	1.77584
ChrX_45590001_45610000	ChrX	45590001	45610000	0.629313	1.69487
ChrX_45600001_45620000	ChrX	45600001	45620000	0.61586	1.54944
ChrX_45610001_45630000	ChrX	45610001	45630000	0.549453	1.58144
ChrX_45640001_45660000	ChrX	45640001	45660000	0.500195	1.67381
ChrX_45670001_45690000	ChrX	45670001	45690000	0.483056	1.70735
ChrX_45750001_45770000	ChrX	45750001	45770000	0.535234	1.87712
ChrX_45760001_45780000	ChrX	45760001	45780000	0.571217	2.06353
ChrX_45810001_45830000	ChrX	45810001	45830000	0.497665	1.95466
ChrX_45830001_45850000	ChrX	45830001	45850000	0.515071	1.60663
ChrX_45870001_45890000	ChrX	45870001	45890000	0.52888	1.66653
ChrX_45880001_45900000	ChrX	45880001	45900000	0.520468	1.79347
ChrX_45890001_45910000	ChrX	45890001	45910000	0.518709	1.59444
ChrX_45900001_45920000	ChrX	45900001	45920000	0.444454	2.04887
ChrX_45910001_45930000	ChrX	45910001	45930000	0.436912	2.0884
ChrX_46010001_46030000	ChrX	46010001	46030000	0.614092	1.44239
ChrX_46240001_46260000	ChrX	46240001	46260000	0.573208	1.61843
ChrX_46330001_46350000	ChrX	46330001	46350000	0.538049	1.64358
ChrX_46590001_46610000	ChrX	46590001	46610000	0.552368	1.62504
ChrX_46730001_46750000	ChrX	46730001	46750000	0.551244	1.66127
ChrX_47050001_47070000	ChrX	47050001	47070000	0.488953	1.66492
ChrX_47090001_47110000	ChrX	47090001	47110000	0.493668	1.80258
ChrX_47100001_47120000	ChrX	47100001	47120000	0.480156	1.72098
ChrX_48480001_48500000	ChrX	48480001	48500000	0.431159	1.89547
ChrX_49110001_49130000	ChrX	49110001	49130000	0.372372	2.28757
ChrX_49160001_49180000	ChrX	49160001	49180000	0.548026	2.13667
ChrX_49310001_49330000	ChrX	49310001	49330000	0.38471	2.65688
ChrX_50180001_50200000	ChrX	50180001	50200000	0.447464	1.79984
ChrX_50710001_50730000	ChrX	50710001	50730000	0.411192	2.03555
ChrX_52210001_52230000	ChrX	52210001	52230000	0.491837	1.75141
ChrX_52220001_52240000	ChrX	52220001	52240000	0.485564	1.84896
ChrX_52230001_52250000	ChrX	52230001	52250000	0.471834	1.95994
ChrX_52670001_52690000	ChrX	52670001	52690000	0.406972	2.41482
ChrX_54760001_54780000	ChrX	54760001	54780000	0.602292	1.43696
ChrX_54830001_54850000	ChrX	54830001	54850000	0.450542	1.97215
ChrX_55450001_55470000	ChrX	55450001	55470000	0.584937	1.61117
ChrX_55500001_55520000	ChrX	55500001	55520000	0.529479	1.66894
ChrX_55510001_55530000	ChrX	55510001	55530000	0.581641	1.61713
ChrX_55520001_55540000	ChrX	55520001	55540000	0.586226	1.94943
ChrX_55530001_55550000	ChrX	55530001	55550000	0.553392	1.7393
ChrX_55790001_55810000	ChrX	55790001	55810000	0.665544	1.38961
ChrX_55860001_55880000	ChrX	55860001	55880000	0.506378	1.67483
ChrX_57110001_57130000	ChrX	57110001	57130000	0.373626	2.1548
ChrX_57510001_57530000	ChrX	57510001	57530000	0.382818	2.39169
ChrX_57520001_57540000	ChrX	57520001	57540000	0.411229	2.66828
ChrX_57610001_57630000	ChrX	57610001	57630000	0.420499	2.16888
ChrX_57640001_57660000	ChrX	57640001	57660000	0.534927	2.08568
ChrX_57650001_57670000	ChrX	57650001	57670000	0.516473	1.76665
ChrX_57770001_57790000	ChrX	57770001	57790000	0.480188	1.94998
ChrX_59480001_59500000	ChrX	59480001	59500000	0.450915	1.87152
ChrX_59490001_59510000	ChrX	59490001	59510000	0.503776	2.04821
ChrX_59510001_59530000	ChrX	59510001	59530000	0.495353	1.89699
ChrX_61660001_61680000	ChrX	61660001	61680000	0.329299	2.51255
ChrX_61670001_61690000	ChrX	61670001	61690000	0.348158	2.57856
ChrX_61700001_61720000	ChrX	61700001	61720000	0.332679	2.48447
ChrX_62700001_62720000	ChrX	62700001	62720000	0.352854	2.33102
ChrX_62710001_62730000	ChrX	62710001	62730000	0.436988	2.71275
ChrX_62720001_62740000	ChrX	62720001	62740000	0.460265	2.5745
ChrX_64970001_64990000	ChrX	64970001	64990000	0.502064	2.13691
ChrX_65610001_65630000	ChrX	65610001	65630000	0.44254	2.26281
ChrX_65620001_65640000	ChrX	65620001	65640000	0.475132	1.78206
ChrX_68500001_68520000	ChrX	68500001	68520000	0.414065	1.97893
ChrX_69820001_69840000	ChrX	69820001	69840000	0.504688	1.63703
ChrX_69870001_69890000	ChrX	69870001	69890000	0.525508	1.82235
ChrX_69890001_69910000	ChrX	69890001	69910000	0.577637	1.60378
ChrX_69950001_69970000	ChrX	69950001	69970000	0.5459	1.81798
ChrX_70080001_70100000	ChrX	70080001	70100000	0.518636	1.62899
ChrX_70090001_70110000	ChrX	70090001	70110000	0.582051	1.58427
ChrX_70160001_70180000	ChrX	70160001	70180000	0.562512	1.70789
ChrX_70190001_70210000	ChrX	70190001	70210000	0.555737	1.78736
ChrX_70220001_70240000	ChrX	70220001	70240000	0.537622	1.60686
ChrX_71980001_72000000	ChrX	71980001	72000000	0.361725	2.30285
ChrX_72290001_72310000	ChrX	72290001	72310000	0.340121	2.55648
ChrX_72300001_72320000	ChrX	72300001	72320000	0.337409	2.72159
ChrX_72320001_72340000	ChrX	72320001	72340000	0.324712	2.67564
ChrX_72330001_72350000	ChrX	72330001	72350000	0.334264	2.68439
ChrX_72340001_72360000	ChrX	72340001	72360000	0.357886	2.69372
ChrX_72360001_72380000	ChrX	72360001	72380000	0.360078	2.74567
ChrX_72370001_72390000	ChrX	72370001	72390000	0.362554	2.82224
ChrX_72390001_72410000	ChrX	72390001	72410000	0.32639	2.60753
ChrX_72400001_72420000	ChrX	72400001	72420000	0.343637	2.47658
ChrX_73260001_73280000	ChrX	73260001	73280000	0.544757	1.5706
ChrX_73350001_73370000	ChrX	73350001	73370000	0.56294	1.56316
ChrX_73510001_73530000	ChrX	73510001	73530000	0.441452	1.84633
ChrX_73580001_73600000	ChrX	73580001	73600000	0.461906	1.80534
ChrX_83000001_83020000	ChrX	83000001	83020000	0.419973	2.06313
ChrX_83360001_83380000	ChrX	83360001	83380000	0.393112	2.40179
ChrX_83850001_83870000	ChrX	83850001	83870000	0.506082	1.88047
ChrX_86030001_86050000	ChrX	86030001	86050000	0.461724	1.91369
ChrX_93890001_93910000	ChrX	93890001	93910000	0.419495	1.97795
ChrX_93900001_93920000	ChrX	93900001	93920000	0.468527	1.78656
ChrX_94000001_94020000	ChrX	94000001	94020000	0.483034	1.71174
ChrX_95360001_95380000	ChrX	95360001	95380000	0.398136	2.20244
ChrX_95880001_95900000	ChrX	95880001	95900000	0.5012	1.70503
ChrX_99270001_99290000	ChrX	99270001	99290000	0.540574	1.60041
ChrX_101710001_101730000	ChrX	101710001	101730000	0.45893	1.79354
ChrX_101720001_101740000	ChrX	101720001	101740000	0.463706	1.9066
ChrX_101730001_101750000	ChrX	101730001	101750000	0.457374	1.85149
ChrX_103190001_103210000	ChrX	103190001	103210000	0.534626	1.67273
ChrX_103220001_103240000	ChrX	103220001	103240000	0.396304	2.01897
ChrX_103430001_103450000	ChrX	103430001	103450000	0.477945	1.79359
ChrX_103440001_103460000	ChrX	103440001	103460000	0.410583	2.29077
ChrX_104980001_105000000	ChrX	104980001	105000000	0.444743	1.95369
ChrX_105080001_105100000	ChrX	105080001	105100000	0.499379	1.75294
ChrX_106460001_106480000	ChrX	106460001	106480000	0.416088	2.10897
ChrX_106470001_106490000	ChrX	106470001	106490000	0.440398	2.11887
ChrX_106790001_106810000	ChrX	106790001	106810000	0.405942	2.02788
ChrX_106940001_106960000	ChrX	106940001	106960000	0.482673	1.86603
ChrX_107040001_107060000	ChrX	107040001	107060000	0.443935	2.04849
ChrX_107050001_107070000	ChrX	107050001	107070000	0.488491	2.33688
ChrX_107060001_107080000	ChrX	107060001	107080000	0.436372	2.30173
ChrX_107630001_107650000	ChrX	107630001	107650000	0.388072	2.15739
ChrX_111160001_111180000	ChrX	111160001	111180000	0.395045	2.05608
ChrX_111170001_111190000	ChrX	111170001	111190000	0.486453	2.03192
ChrX_111180001_111200000	ChrX	111180001	111200000	0.562602	2.20484
ChrX_111230001_111250000	ChrX	111230001	111250000	0.472681	1.81388
ChrX_111380001_111400000	ChrX	111380001	111400000	0.442251	1.86423
ChrX_131690001_131710000	ChrX	131690001	131710000	0.585241	1.54909
ChrX_131700001_131720000	ChrX	131700001	131720000	0.568865	1.51002
ChrX_131880001_131900000	ChrX	131880001	131900000	0.418772	2.29933
ChrX_131930001_131950000	ChrX	131930001	131950000	0.453461	1.95748
ChrX_132300001_132320000	ChrX	132300001	132320000	0.49467	1.65979
ChrX_135570001_135590000	ChrX	135570001	135590000	0.361684	2.53788
ChrX_136830001_136850000	ChrX	136830001	136850000	0.331671	2.75016
ChrX_136930001_136950000	ChrX	136930001	136950000	0.455831	2.25986
ChrX_136940001_136960000	ChrX	136940001	136960000	0.415704	2.29891
